# Supplementary material
Source: PubMed Central journal article supplement (PMC5111717)
Supplement: pnas.1608765113.sapp.pdf [file pnas.1608765113.sapp.pdf]

## Supplementary information

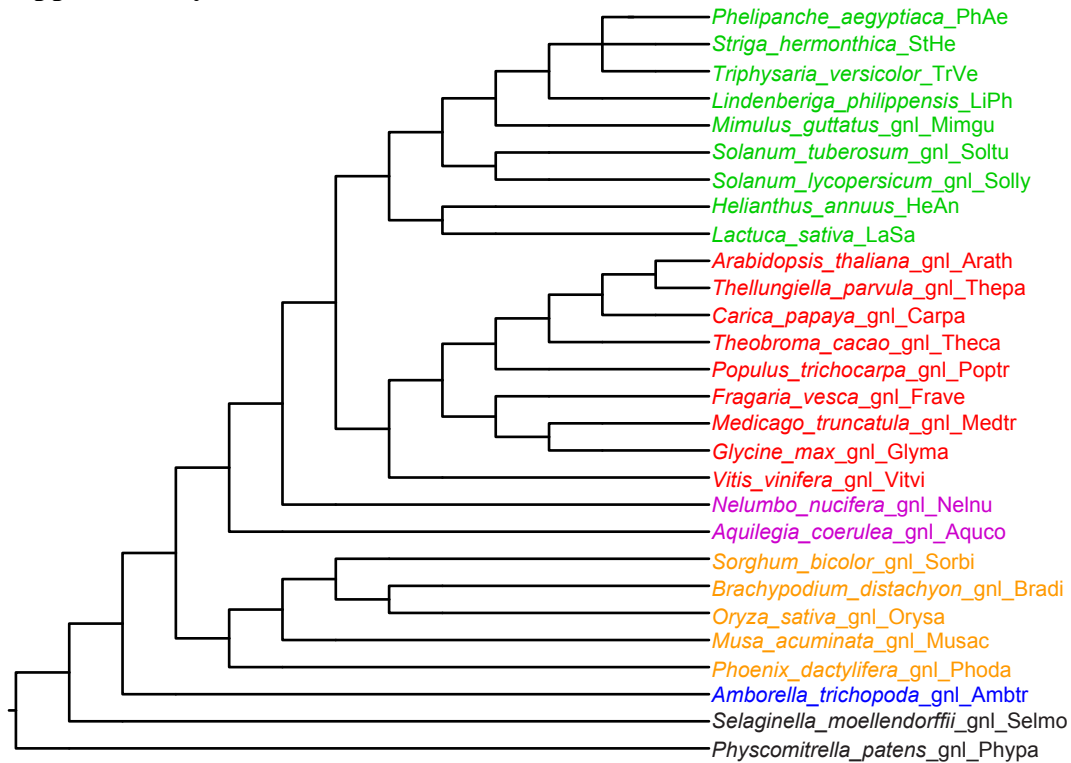

**Figure S1.** The species tree for HGT discovery. This tree includes 22 sequenced plant genomes containing “gnl\_” followed by the first three letters of the genus name, and first two letters of the species name. It also includes four transcriptomes generated in this study – one nonparasitic outgroup *Lindenbergia*, and three parasitic plants *Triphysaria*, *Striga*, and *Phelipanche*, as well as two additional asterids with extensive EST sequence datasets – *Helianthus* and *Lactuca*. Color codes: asterid (green); rosid (red); basal eudicot (purple); monocot (gold); basal angiosperm (blue); outgroup (black).

Fig. S2.1 - orthogroup 17

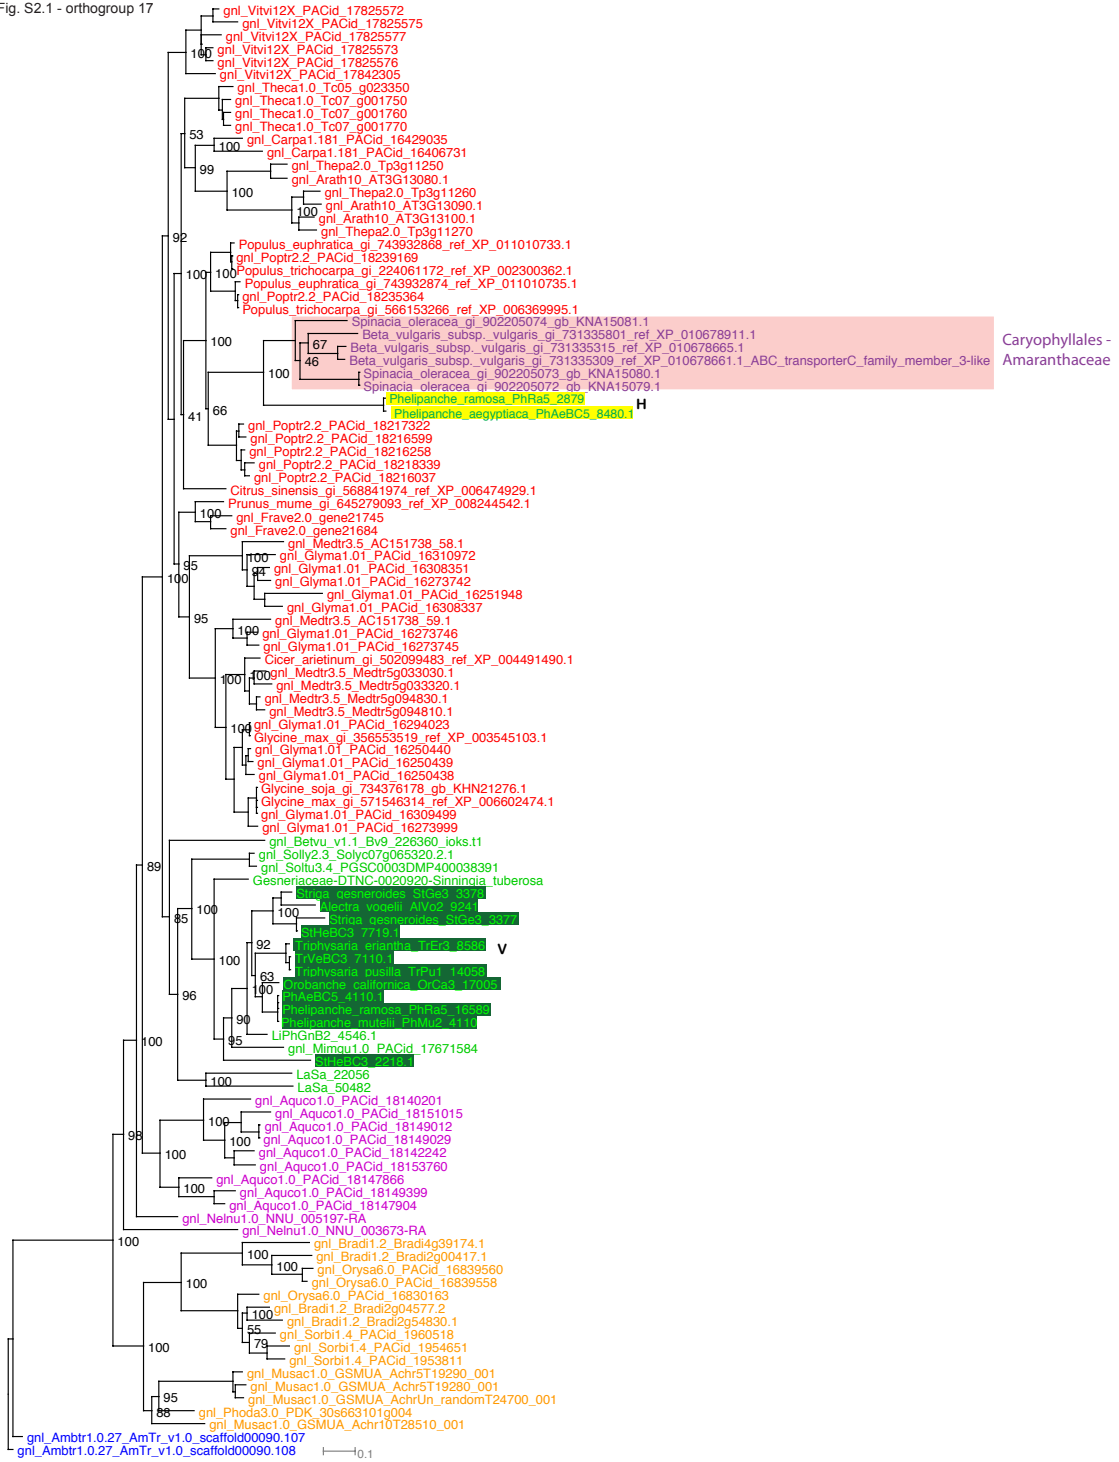

Fig. S2.2 - orthogroup 218

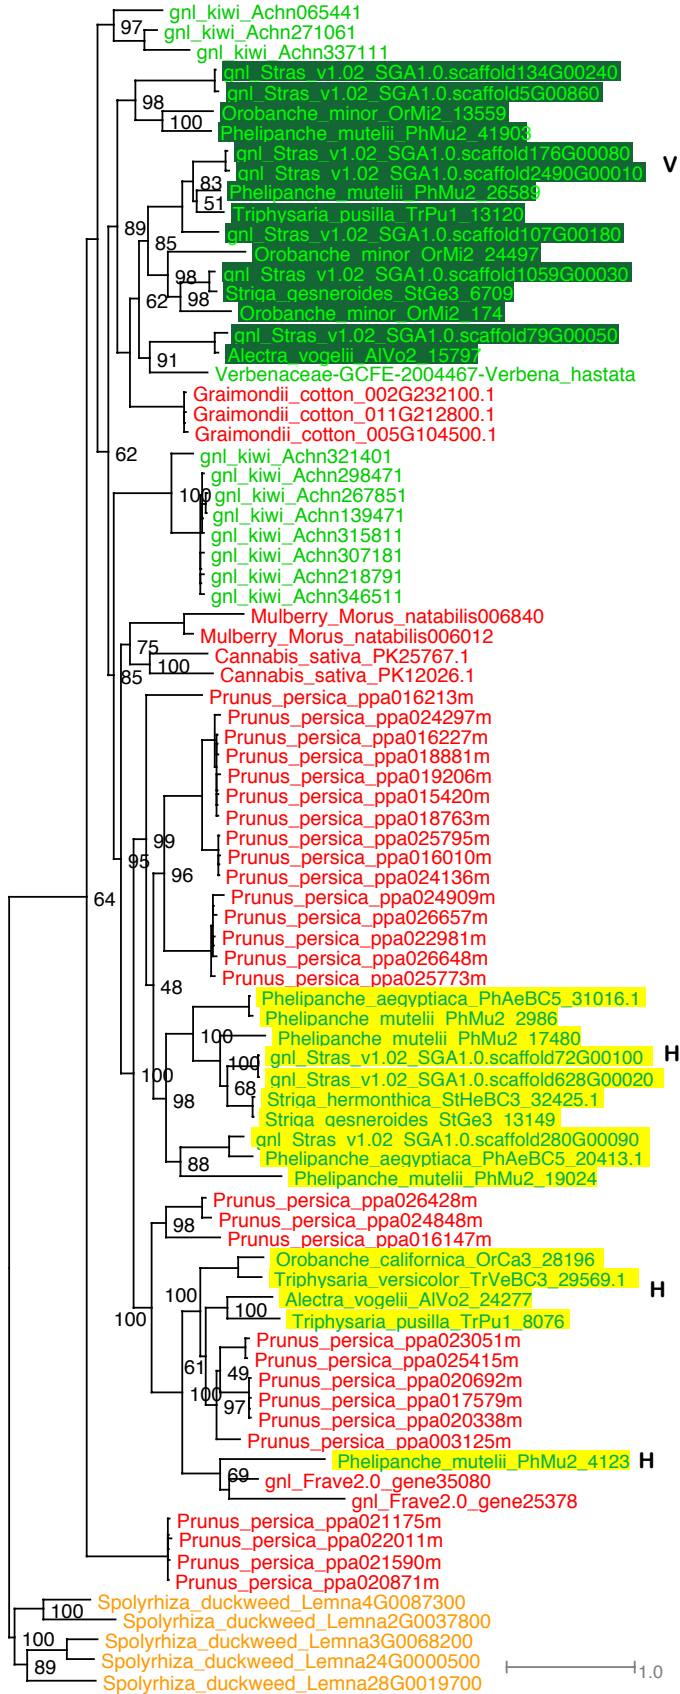

Fig. S2.3- orthogroup 226

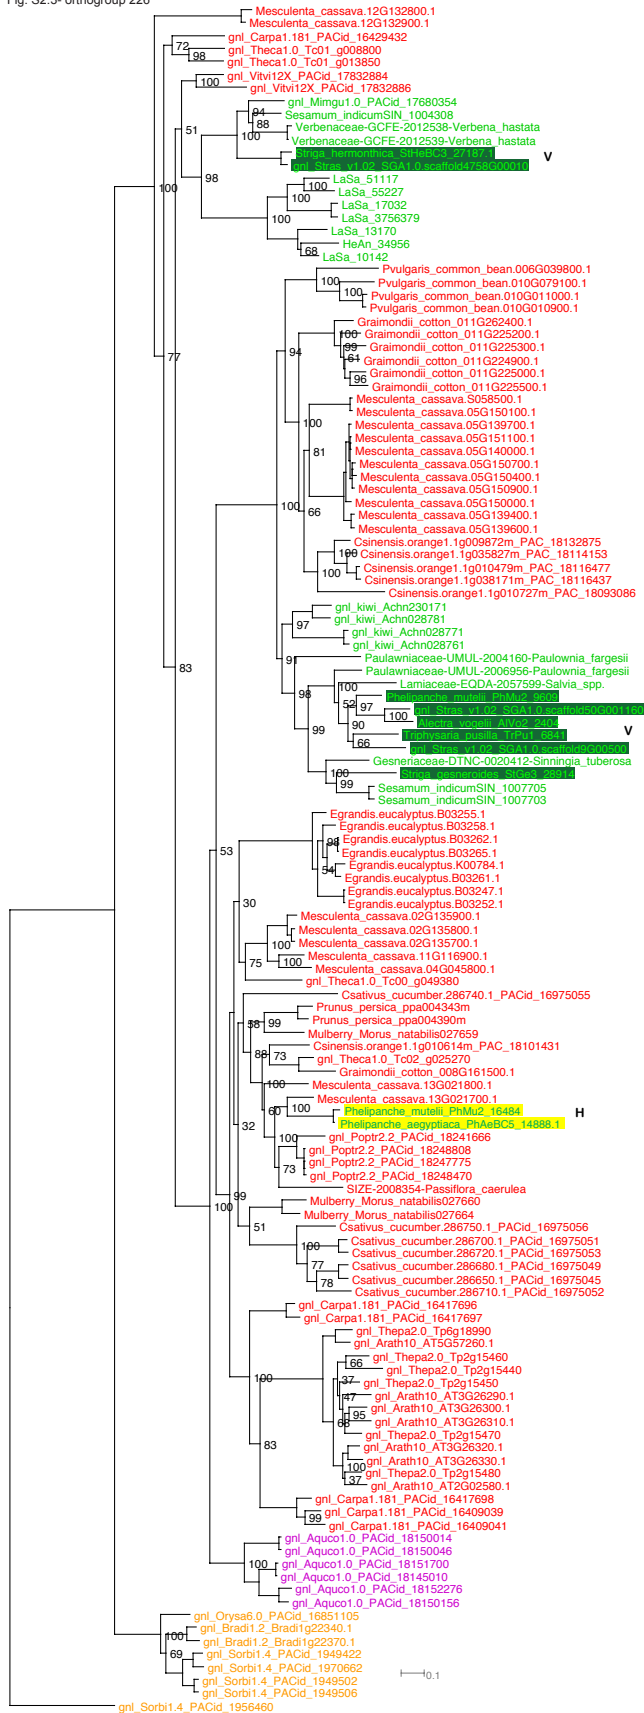

Fig. S2.4 - orthogroup 806

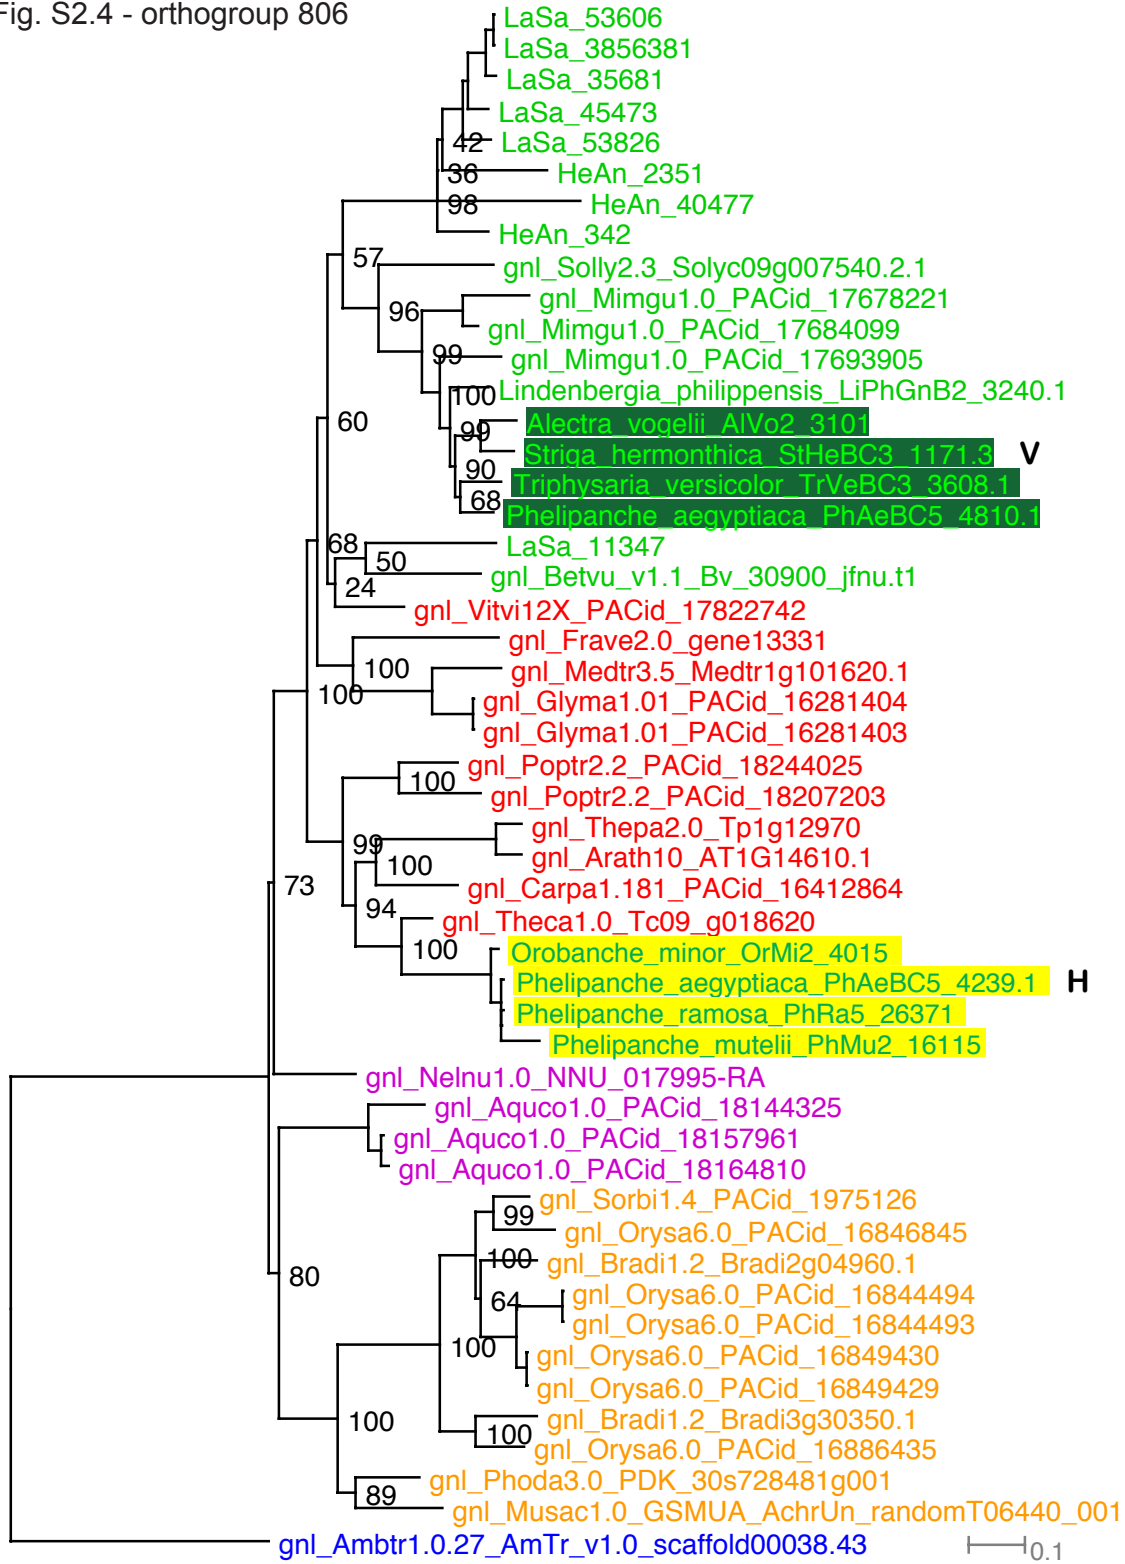

Fig. S2.5 - orthogroup 1021

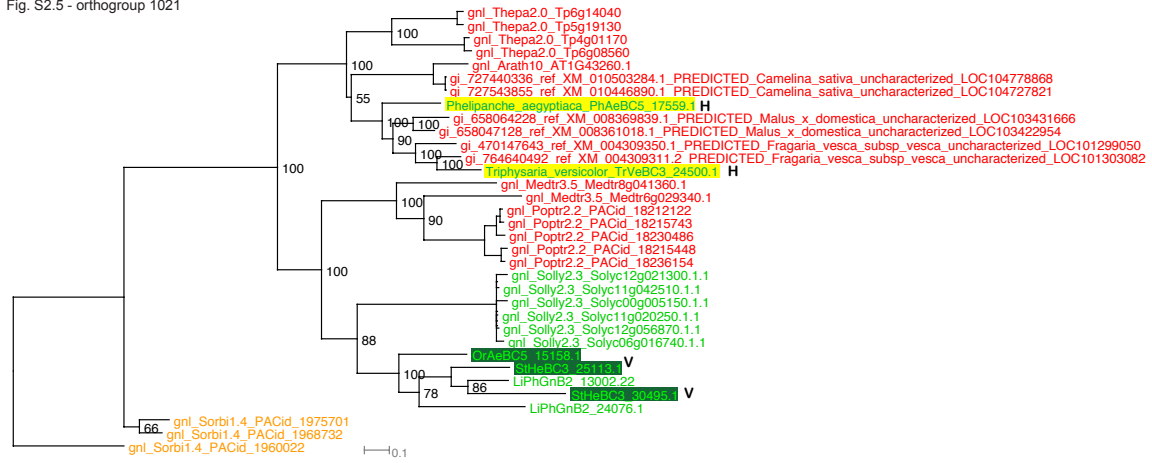

Fig. S2.6 - orthogroup 1226

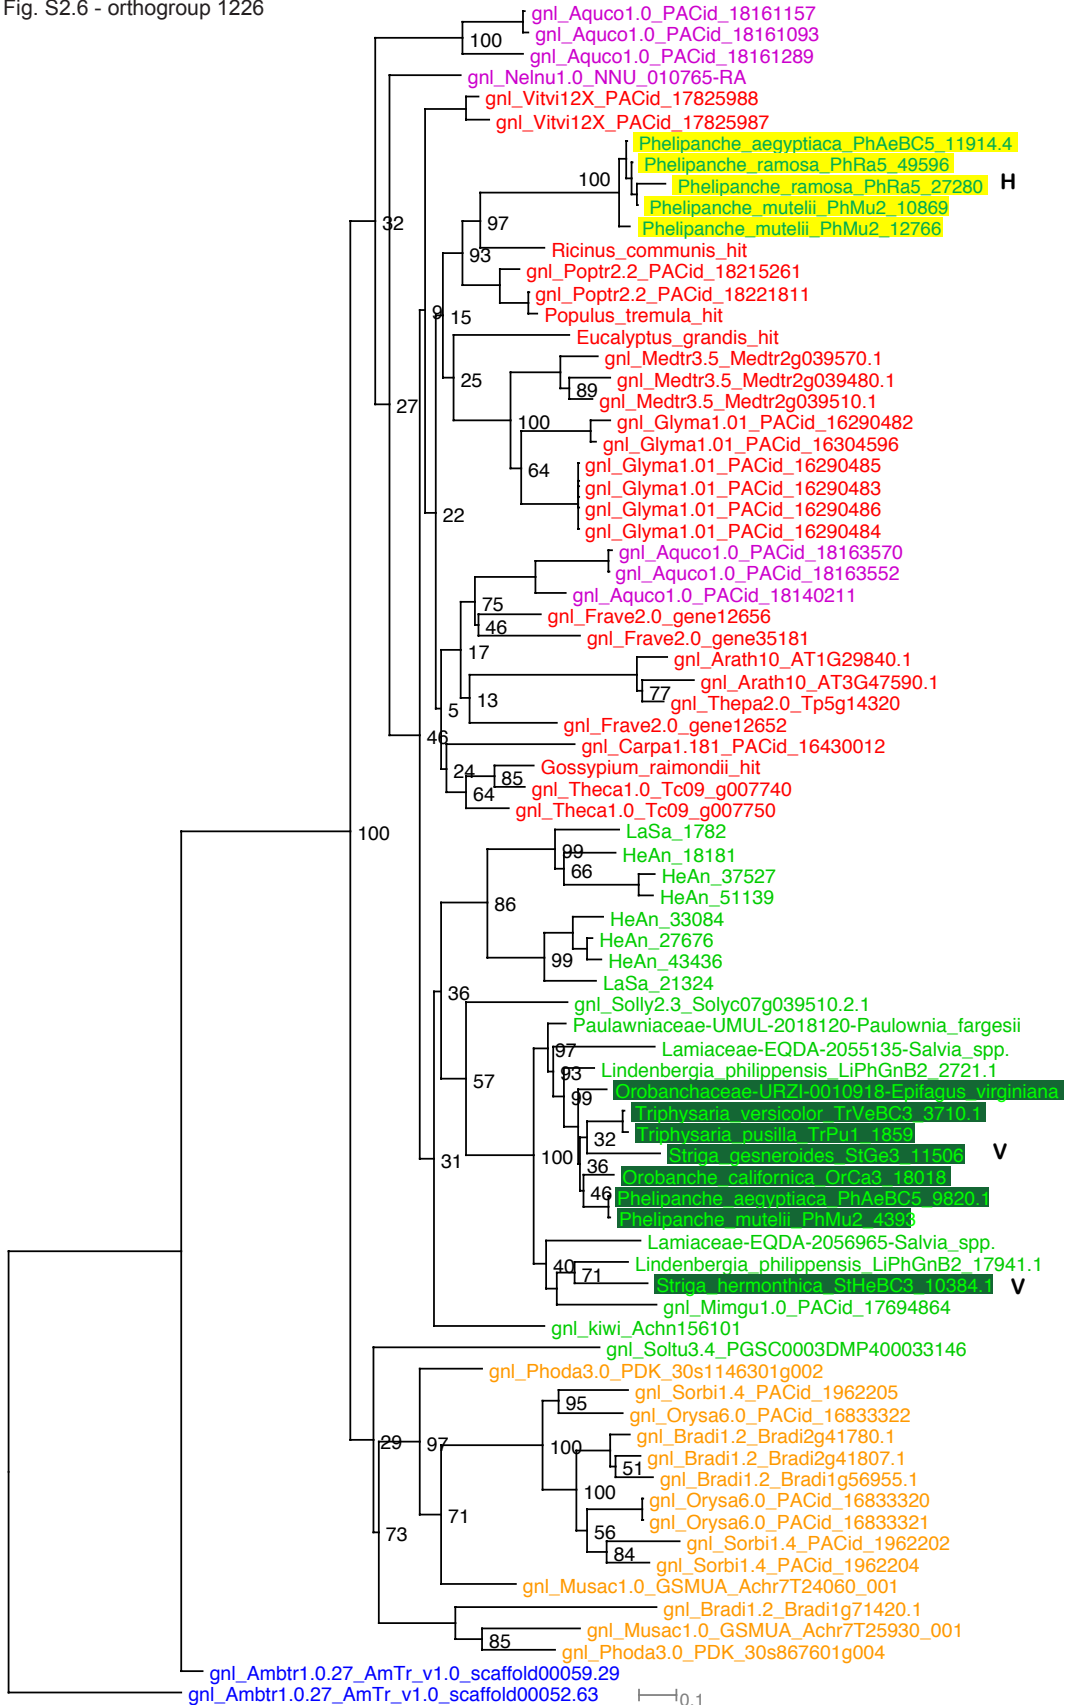

Fig. S2.7 - orthogroup 1685

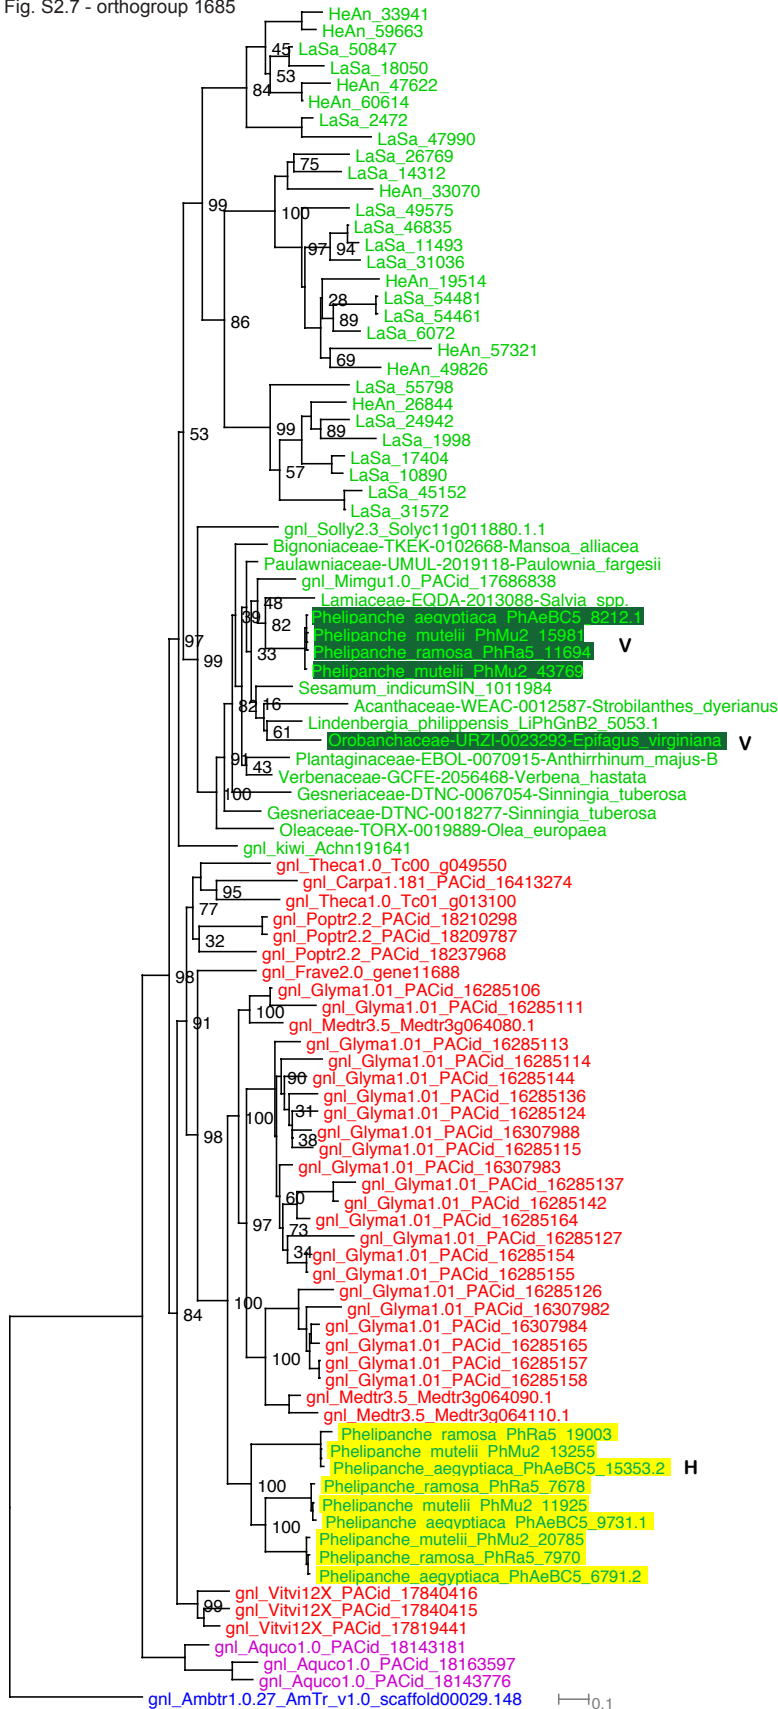



Fig. S2.8 - orthogroup 1886

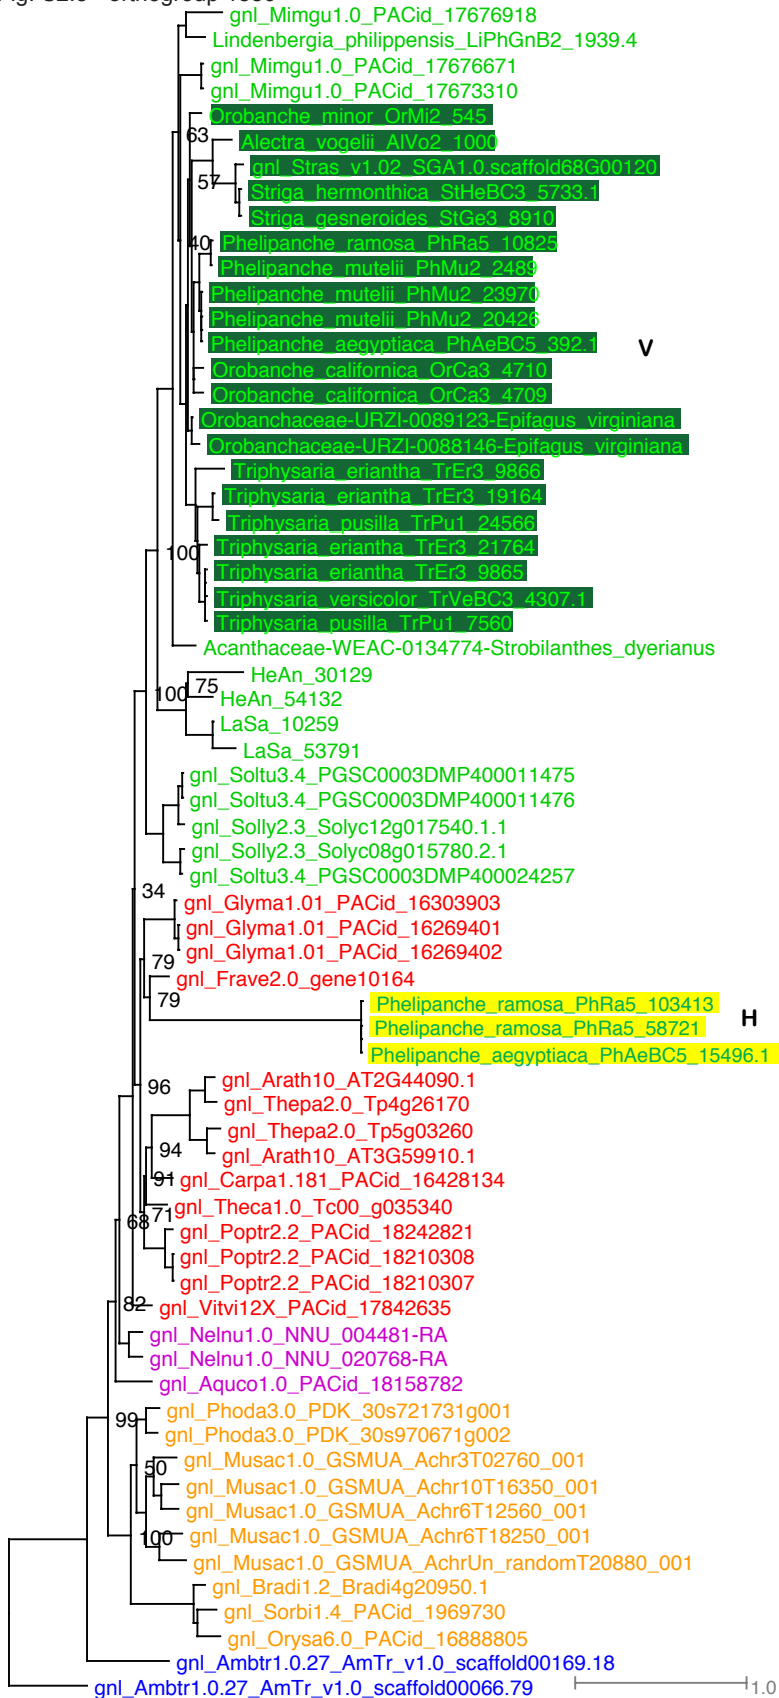

Fig. S2.9 - orthogroup 2270

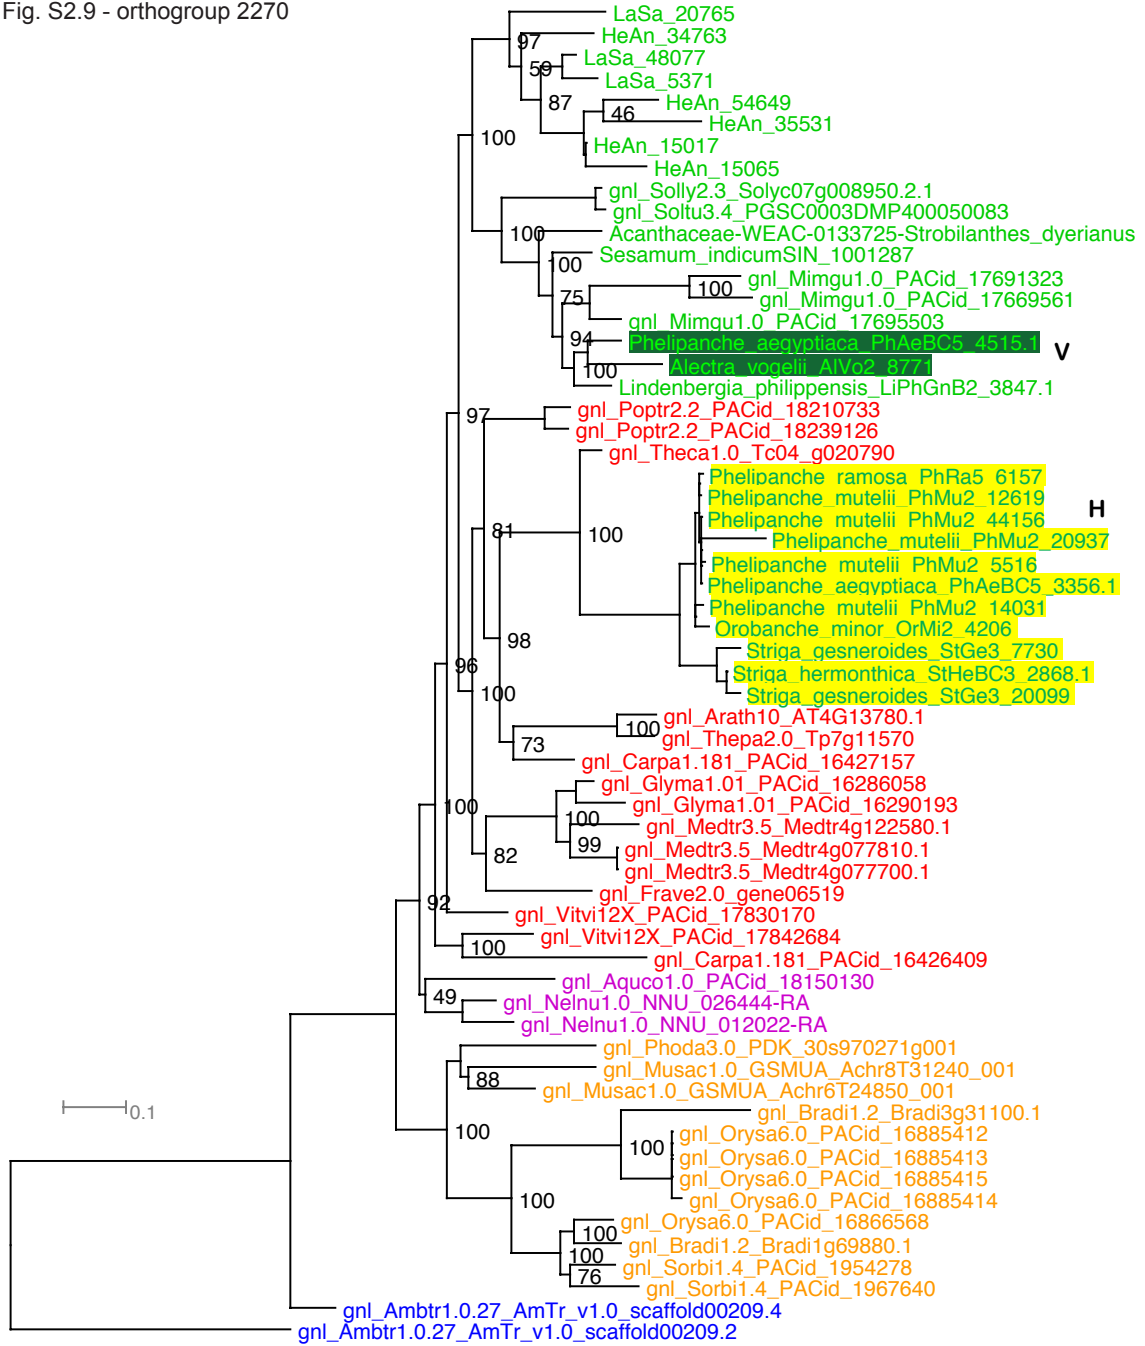

Fig. S2.10 - orthogroup 2376

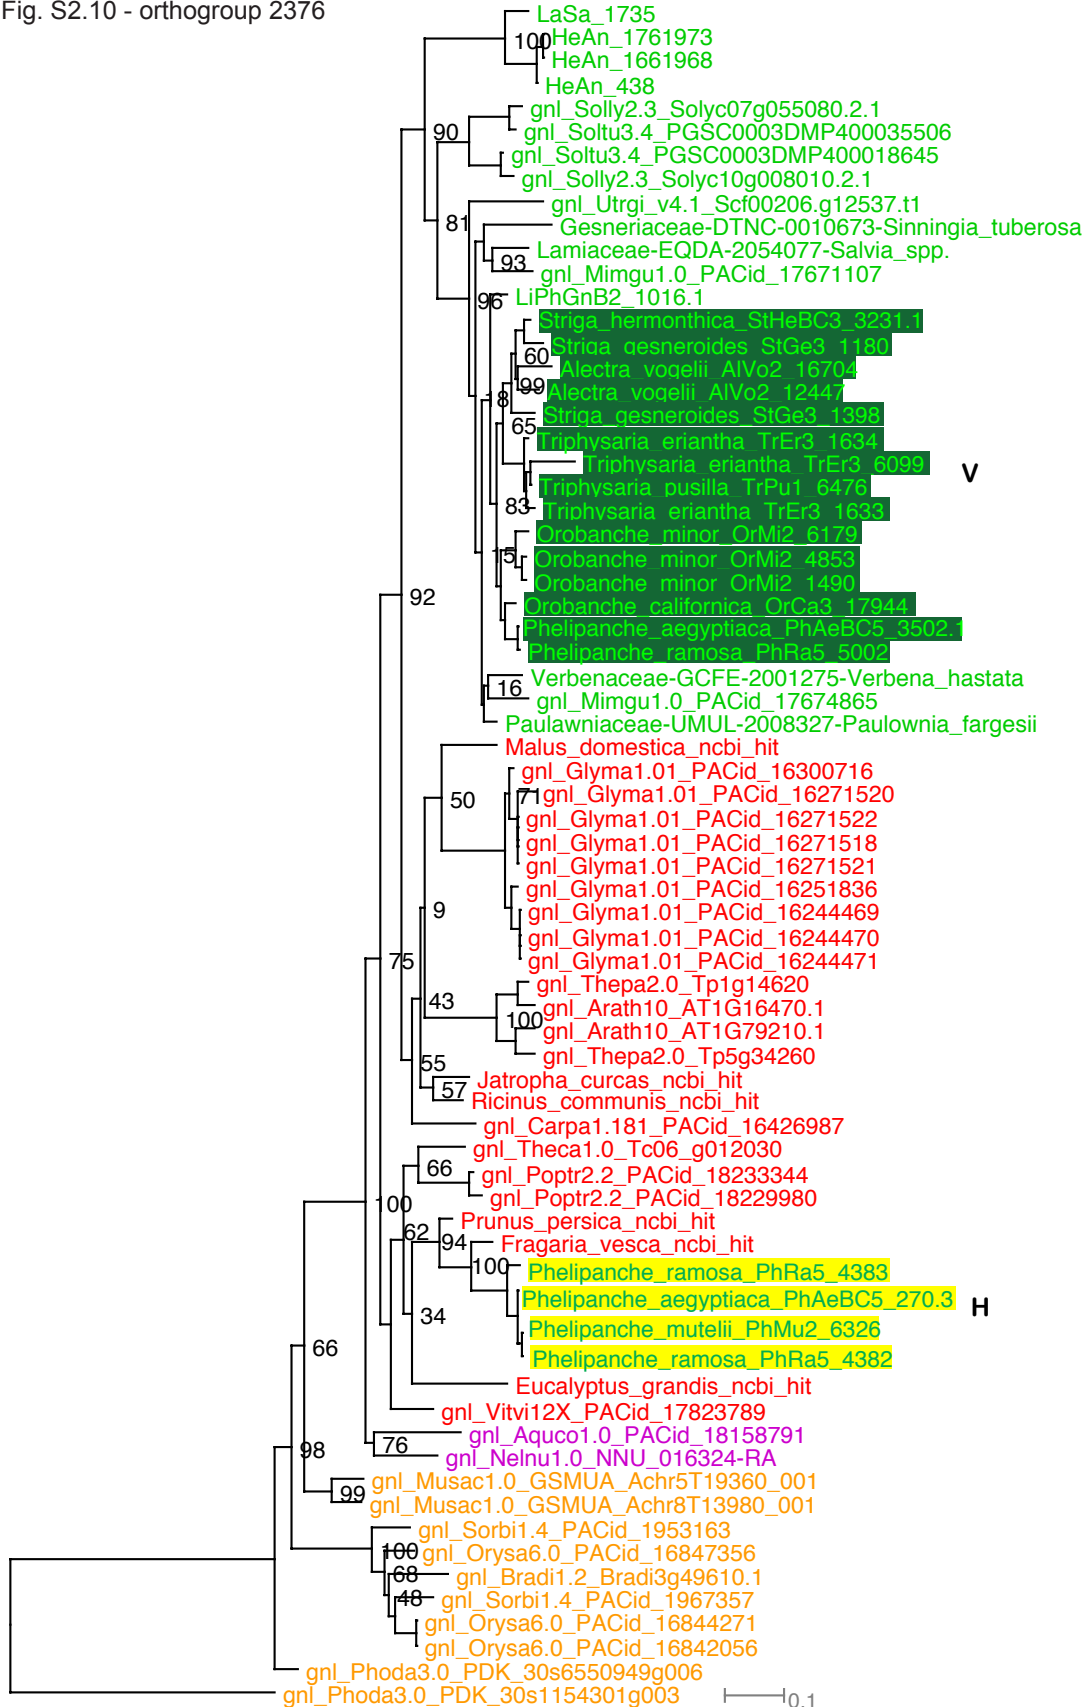

Fig. S2.11 - orthogroup 3861

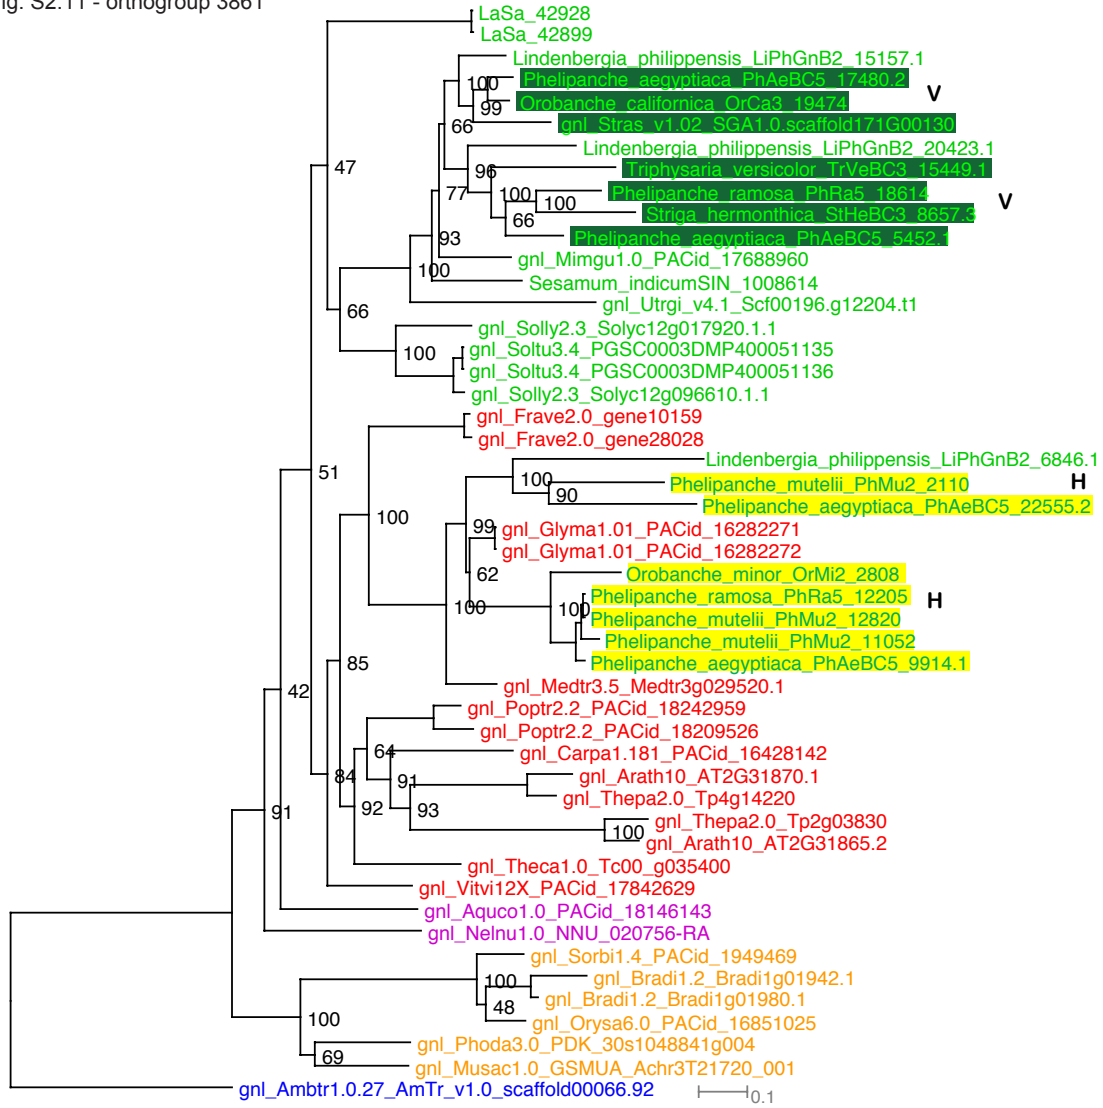

Fig. S2.12 - orthogroup 4067

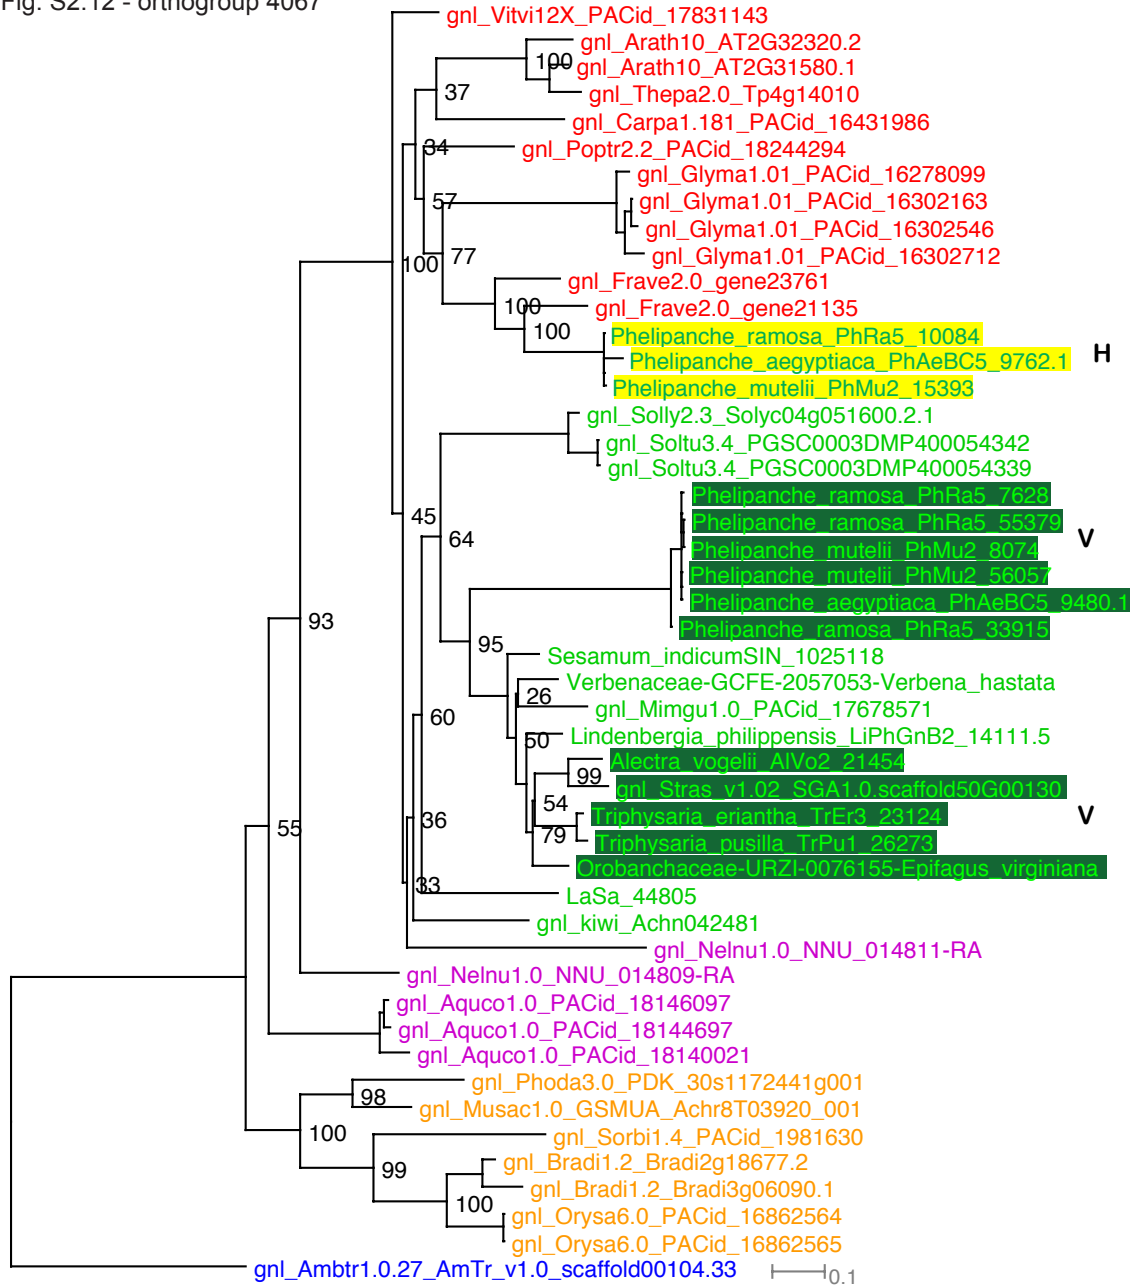

Fig. S2.13 - orthogroup 4572

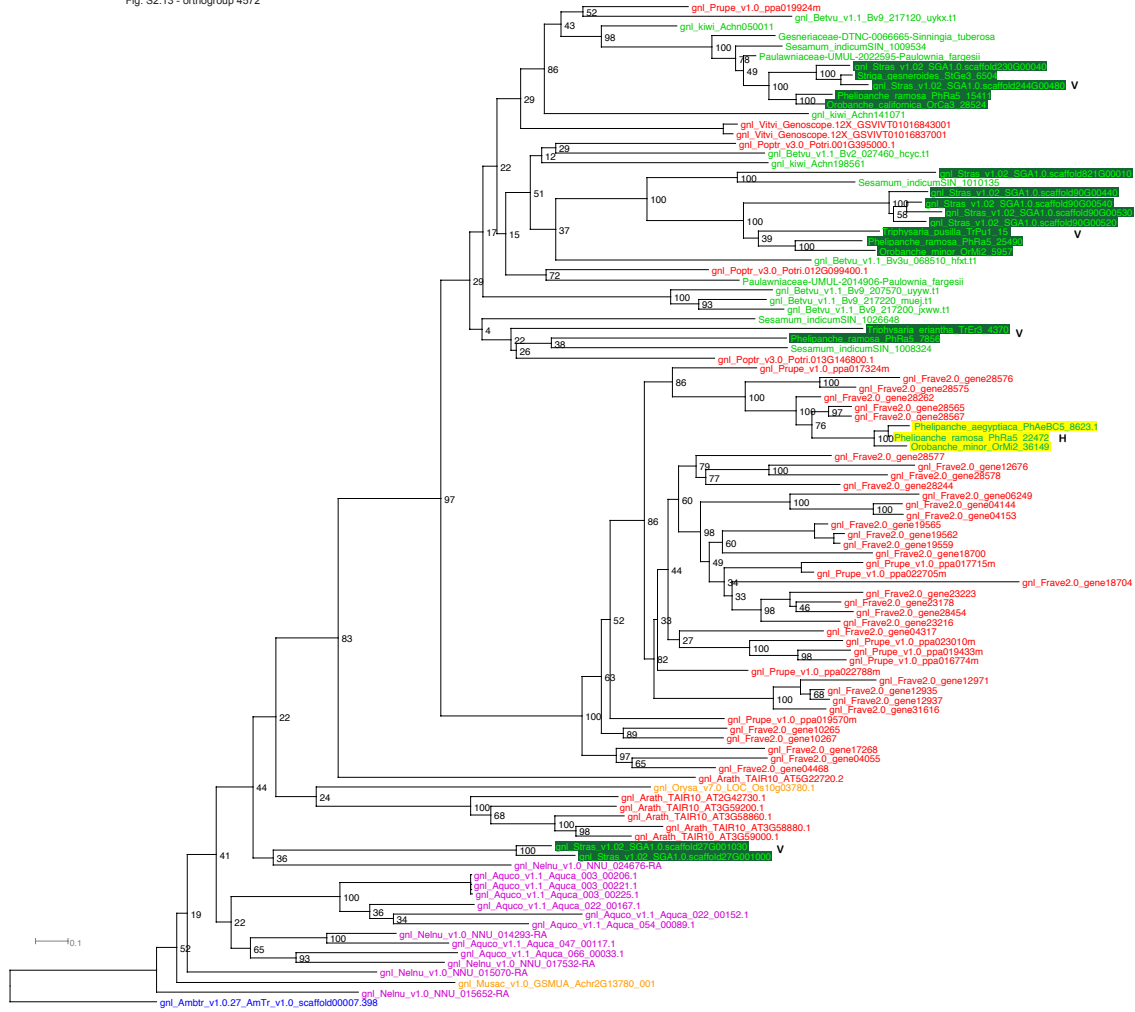

Fig. S2.14 - orthogroup 4598

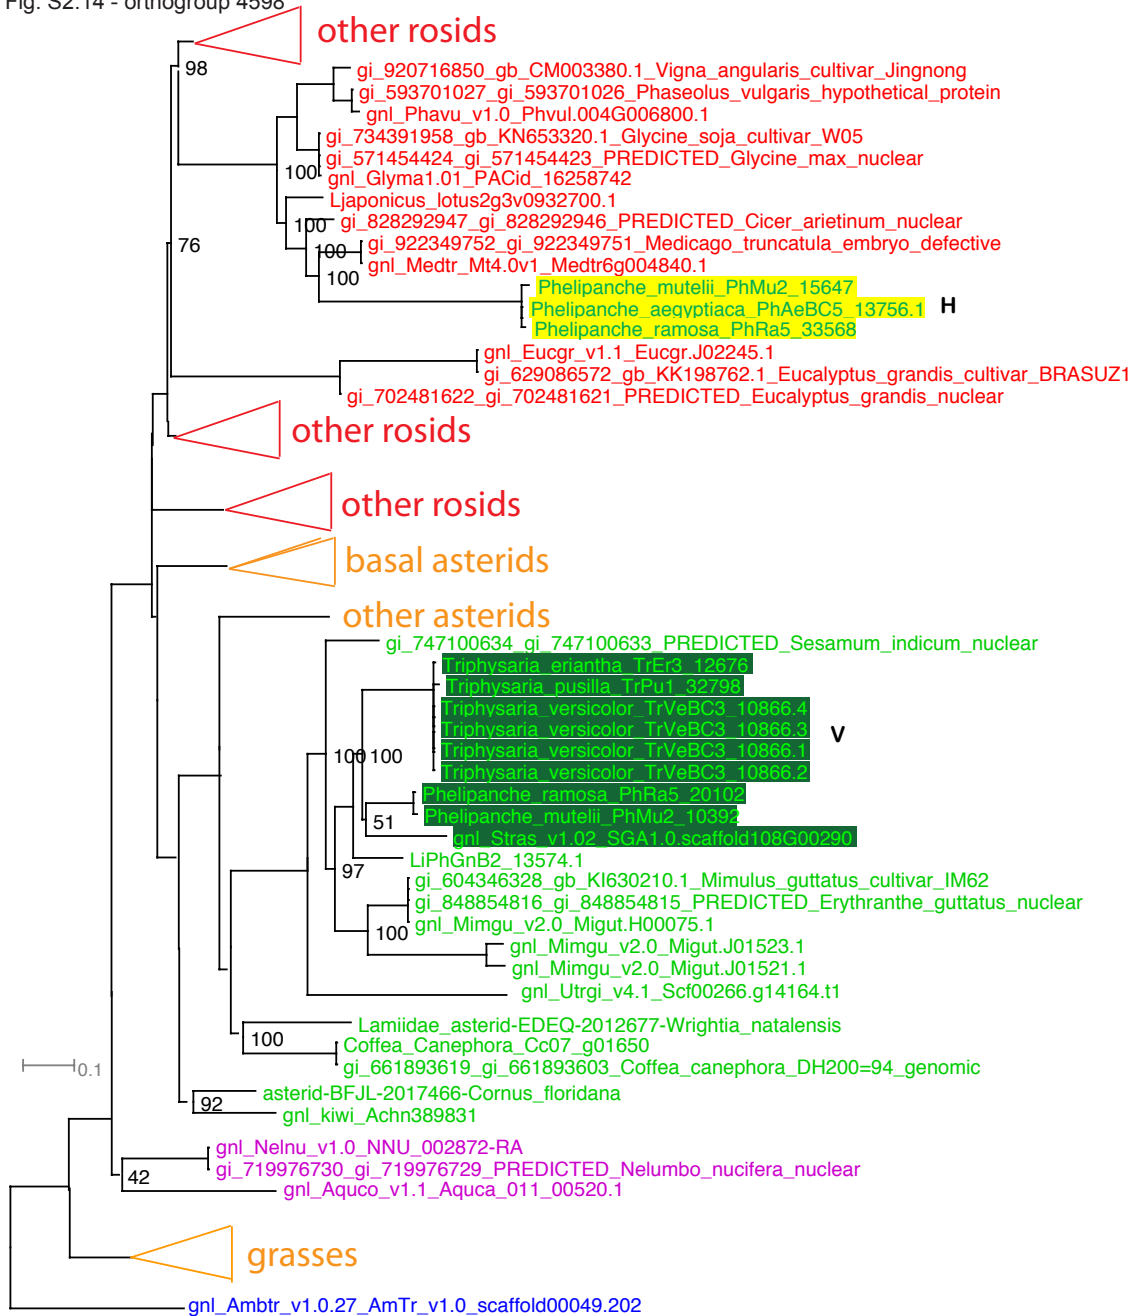

Fig. S2.15- orthogroup 5002

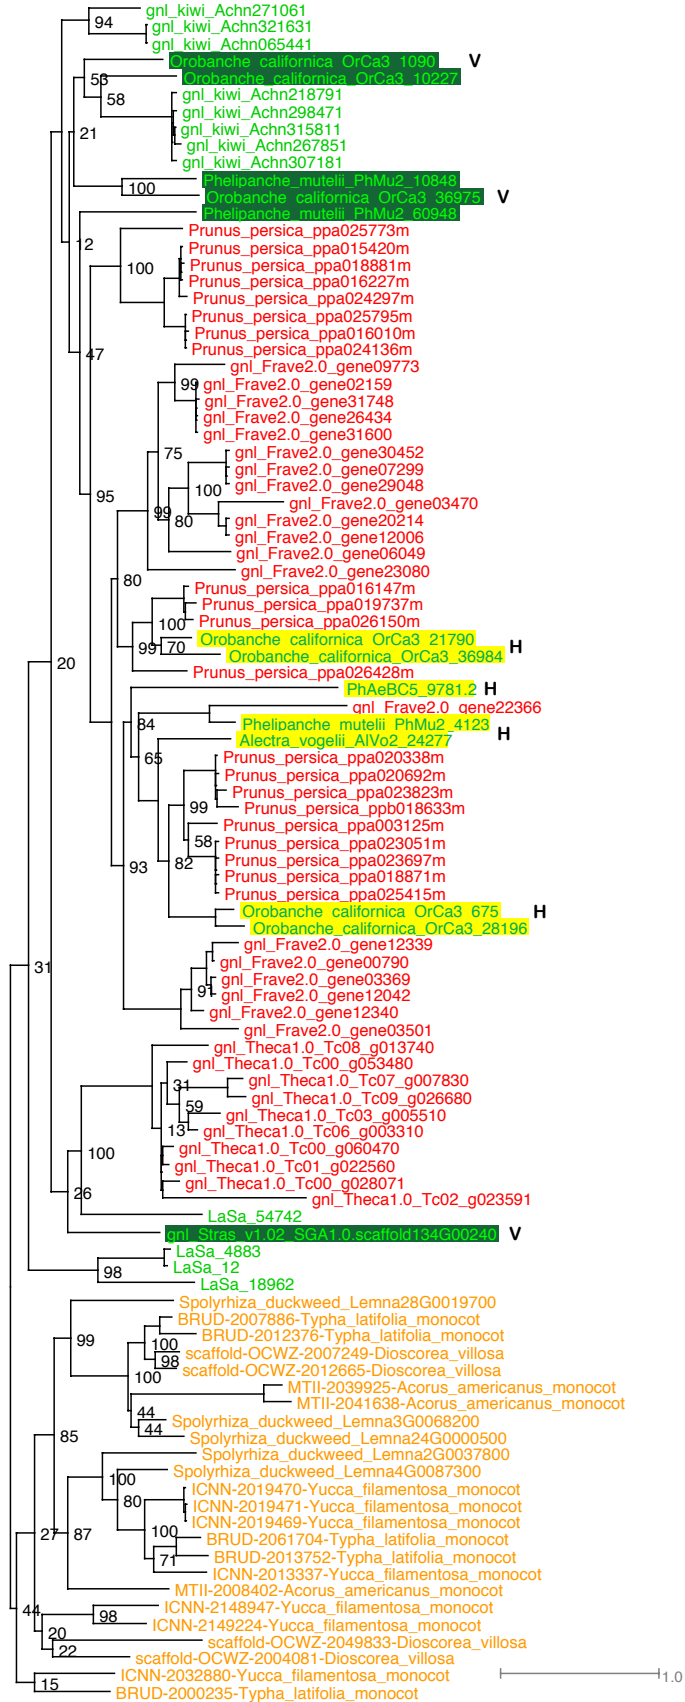



Fig. S2.16 - orthogroup 5896

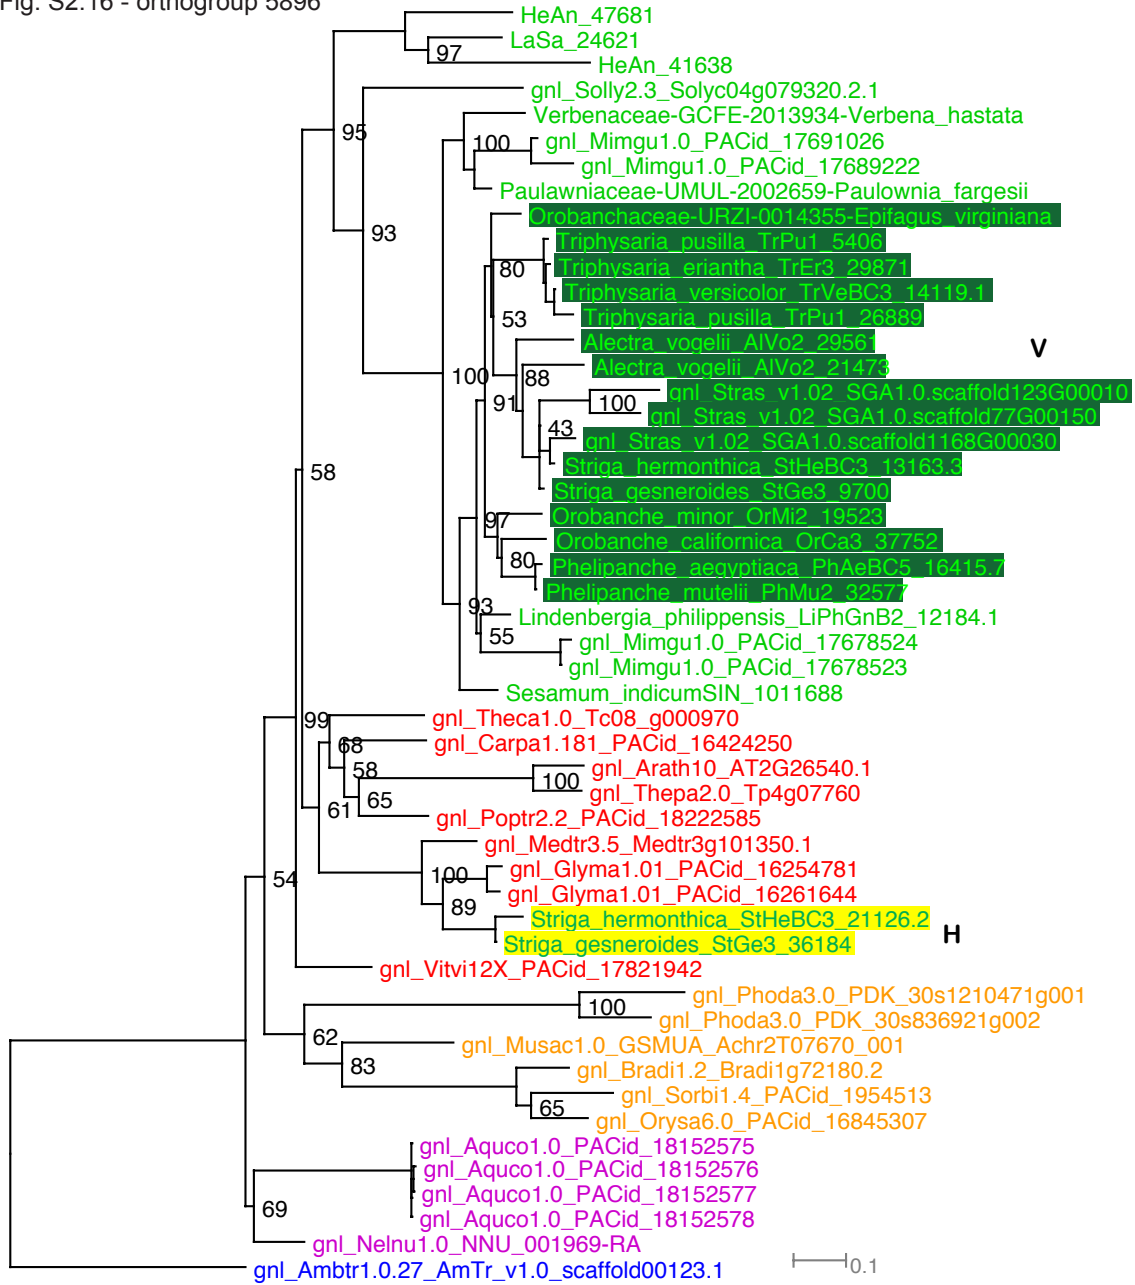

Fig. S2.17 - orthogroup 8888

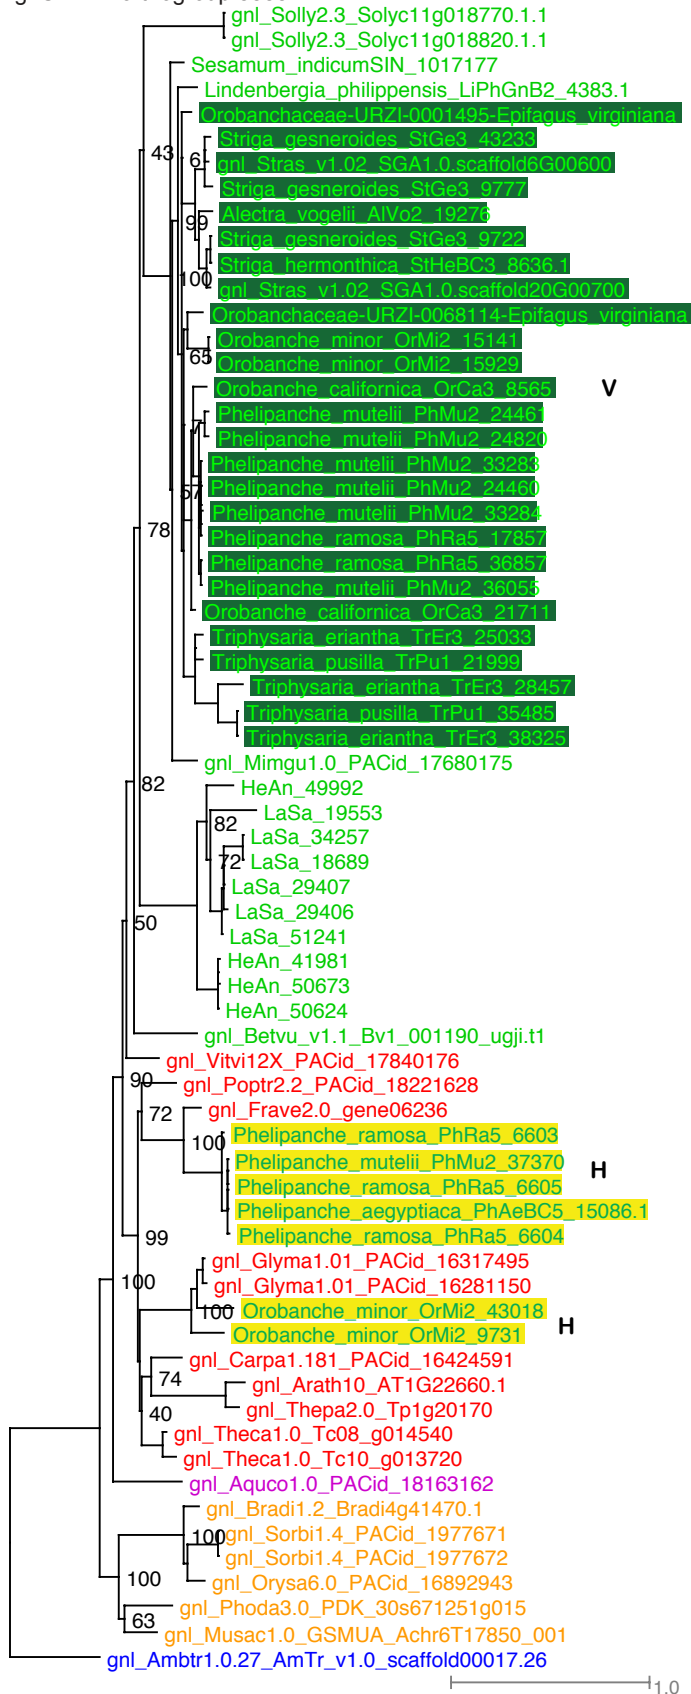

Fig. S2.18 - orthogroup 9613

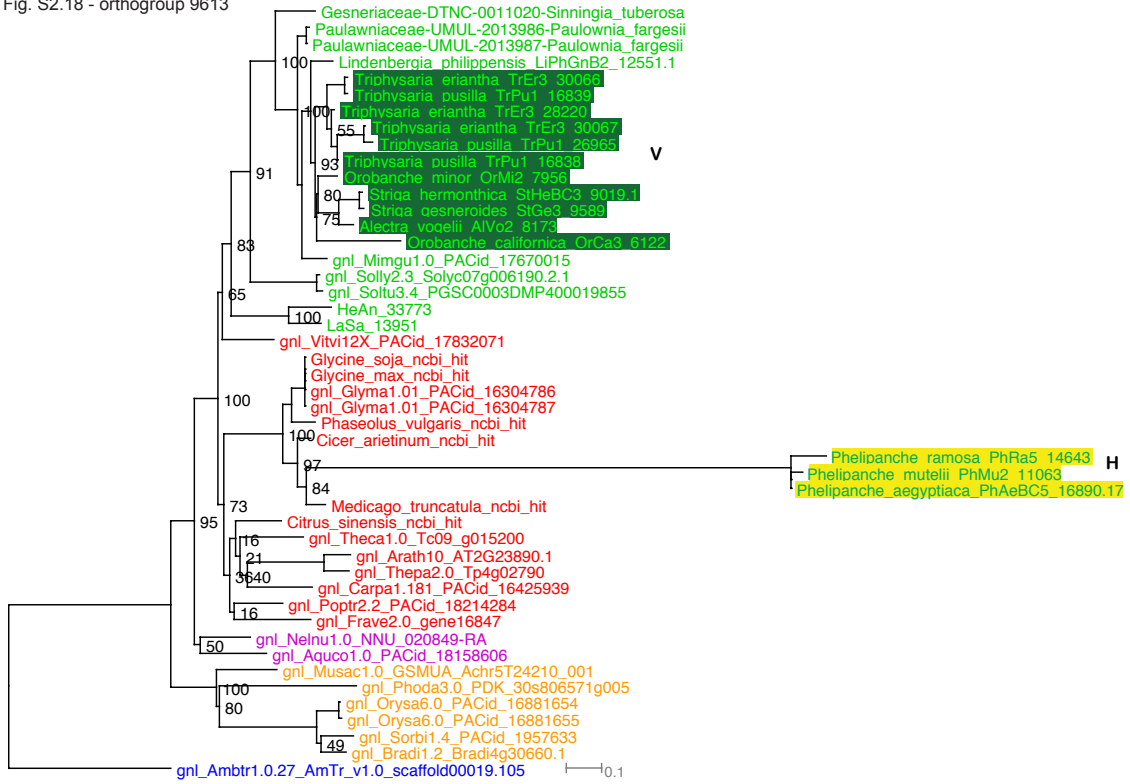

Fig. S2.19 - orthogroup 10050

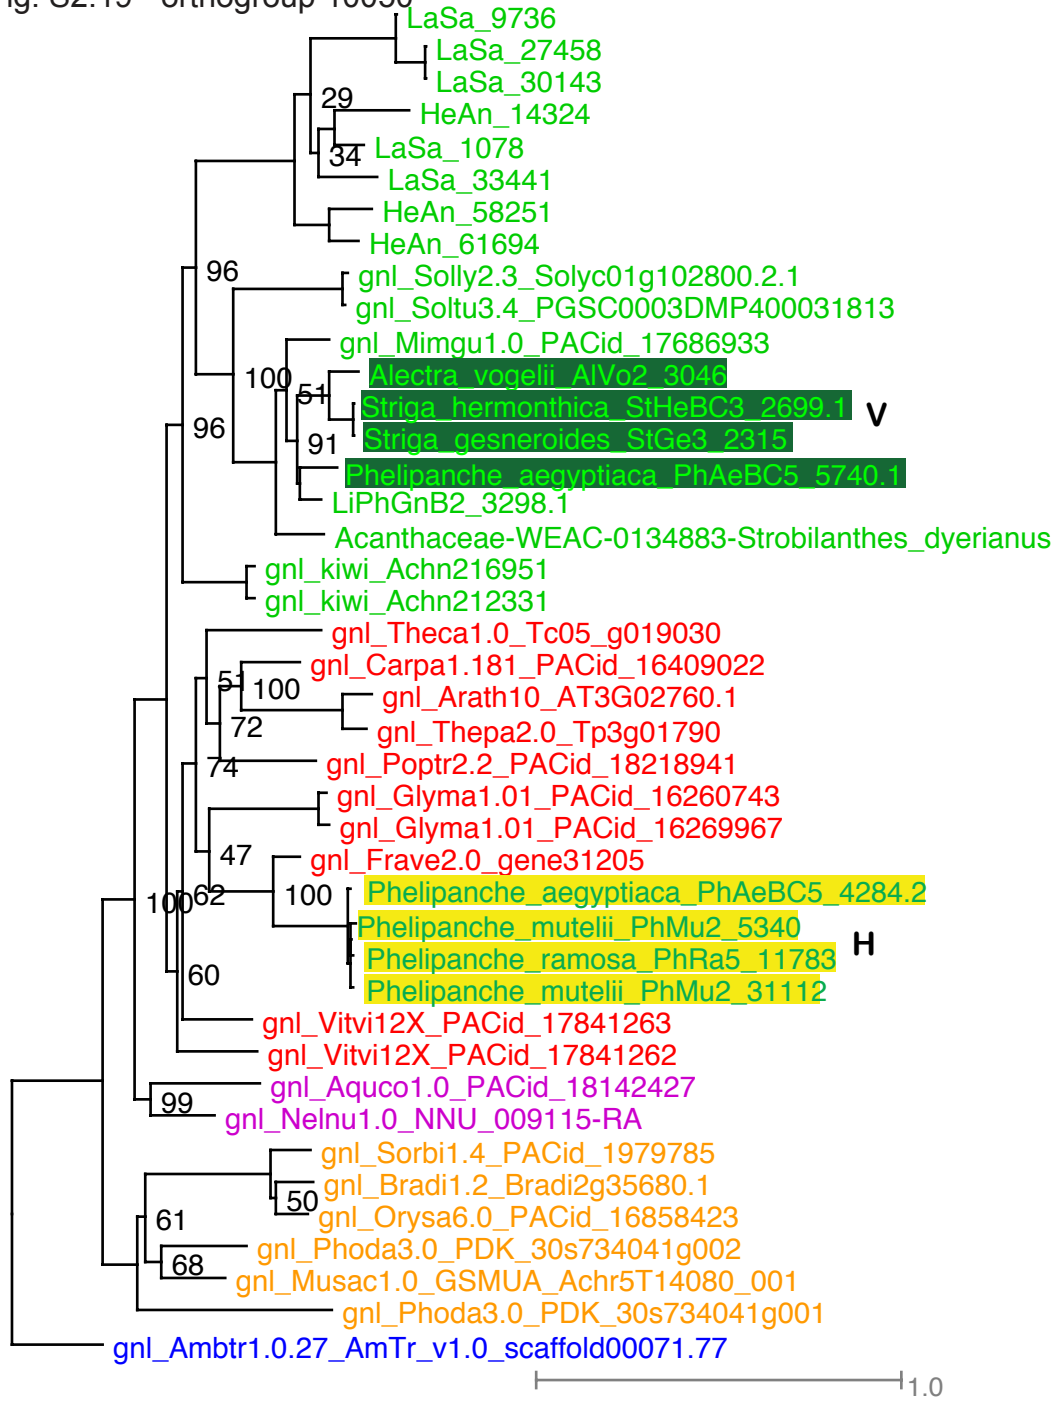

Fig. S2.20 - orthogroup 10143

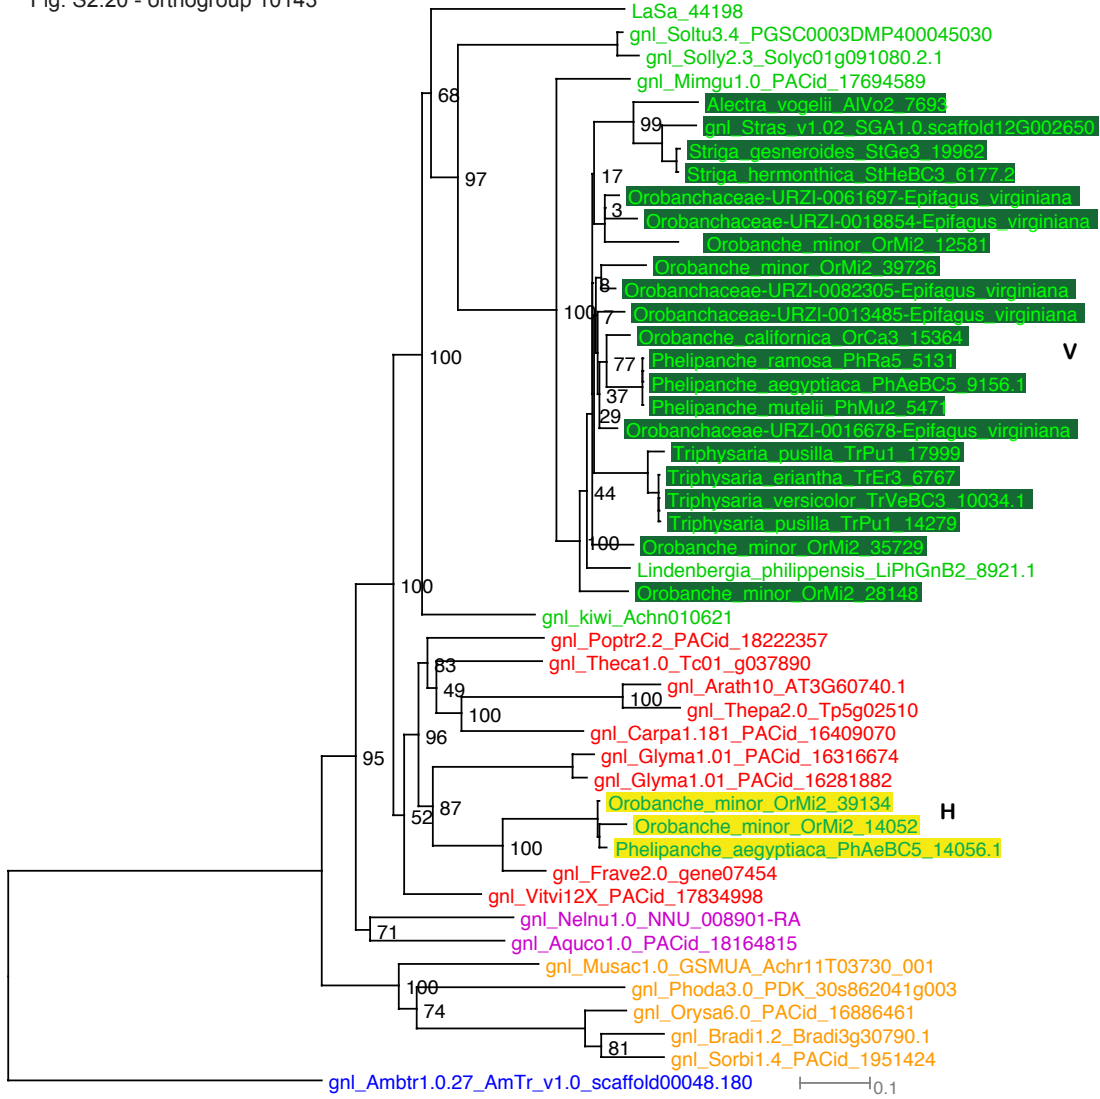

Fig. S2.21 - orthogroup 11437

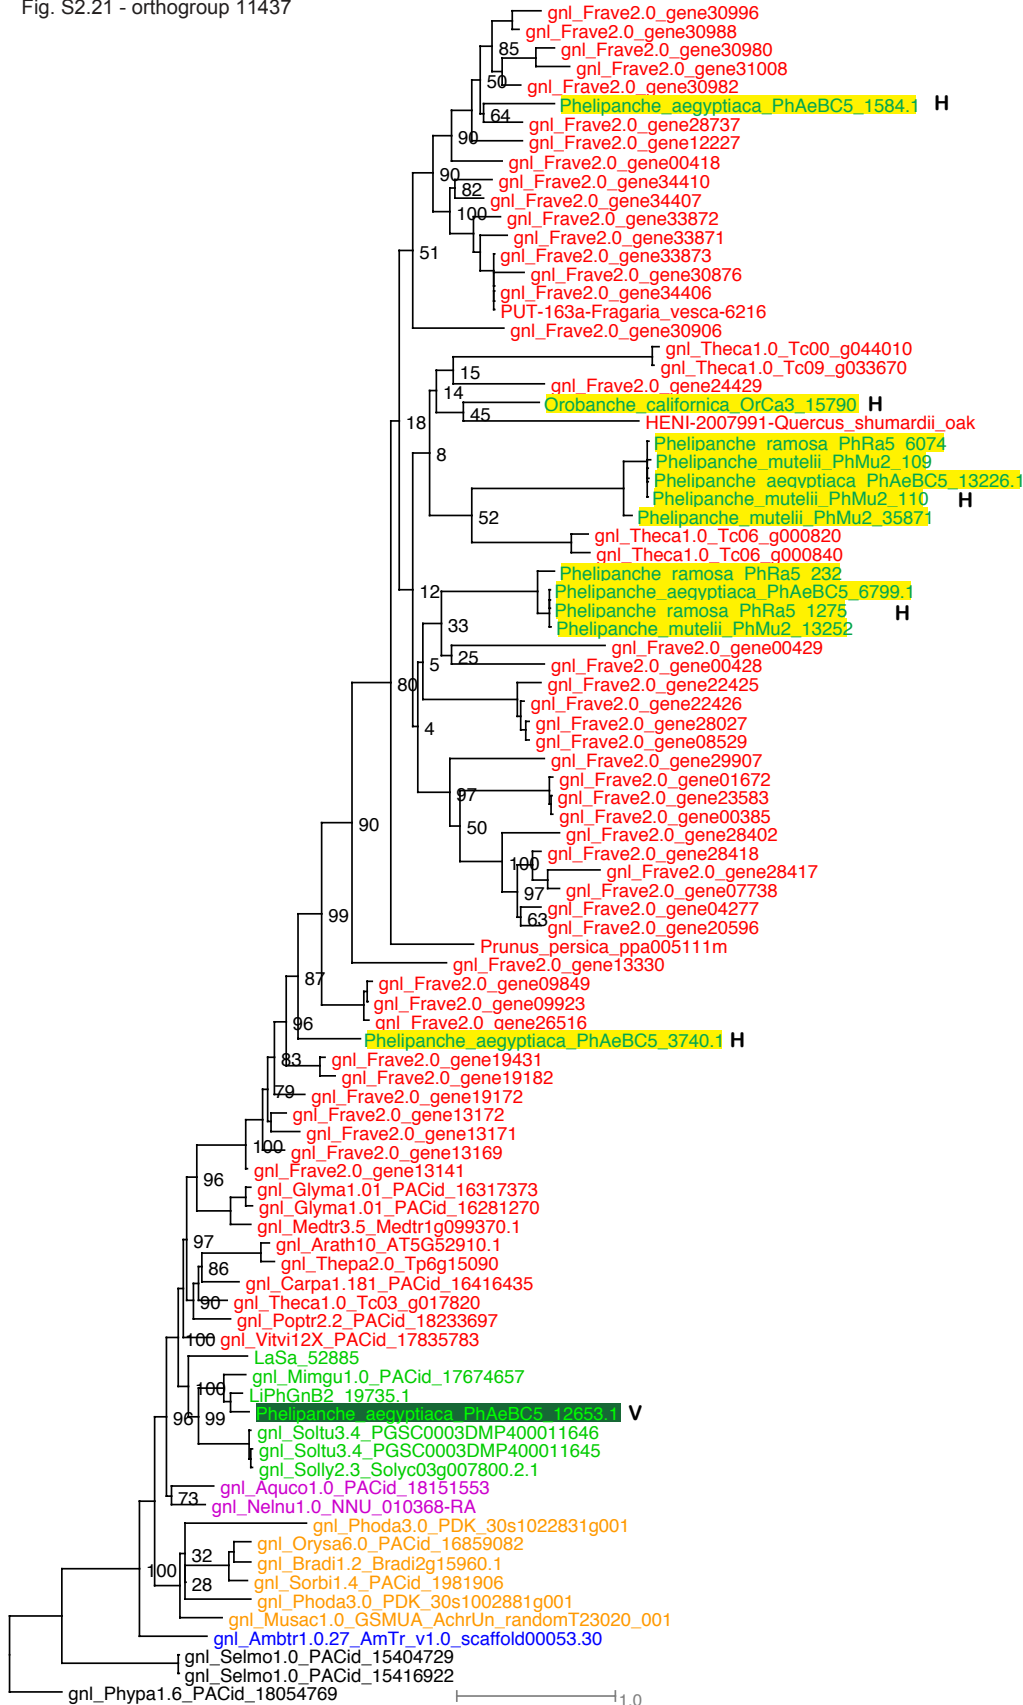

Fig. S2.22 - orthogroup 11841

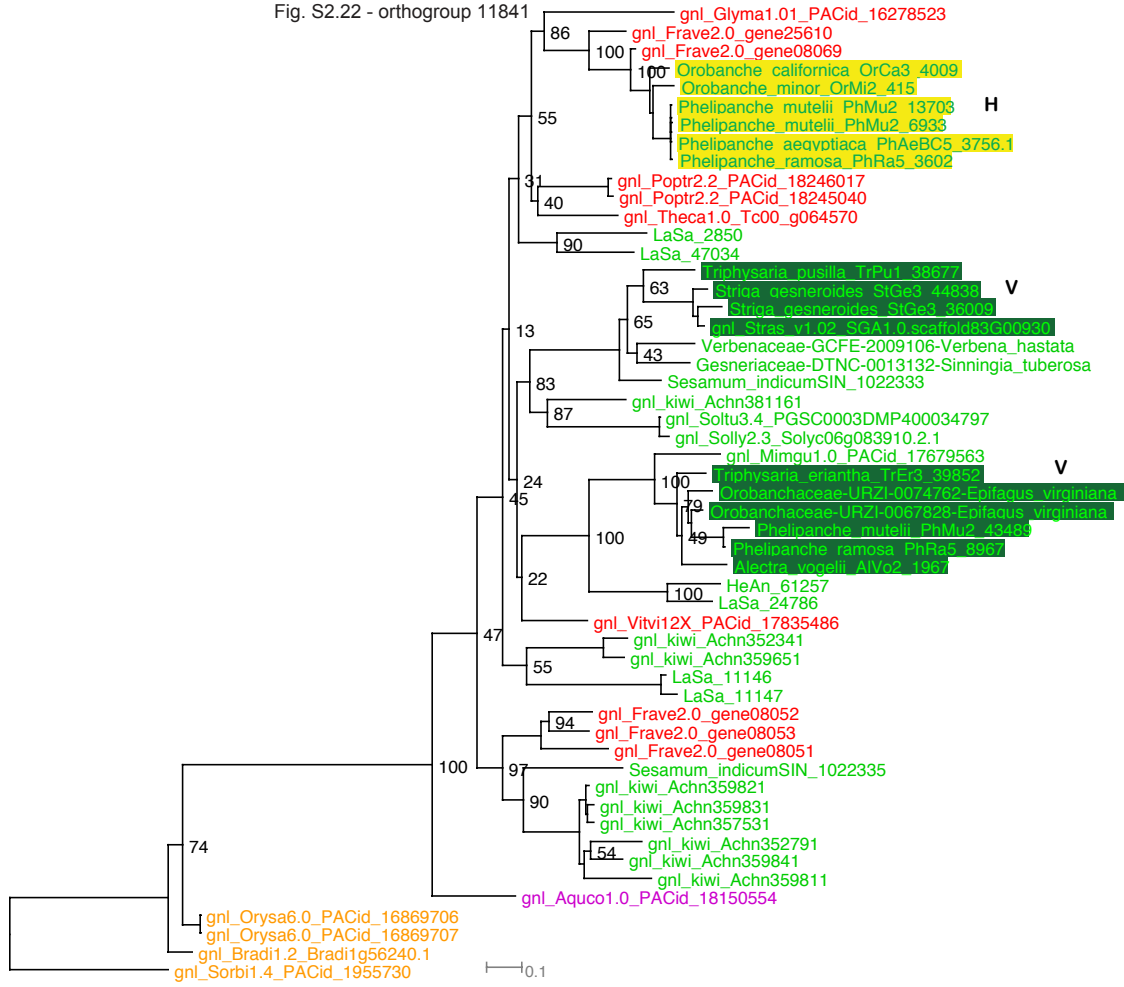

Fig. S2.23 - orthogroup 12835

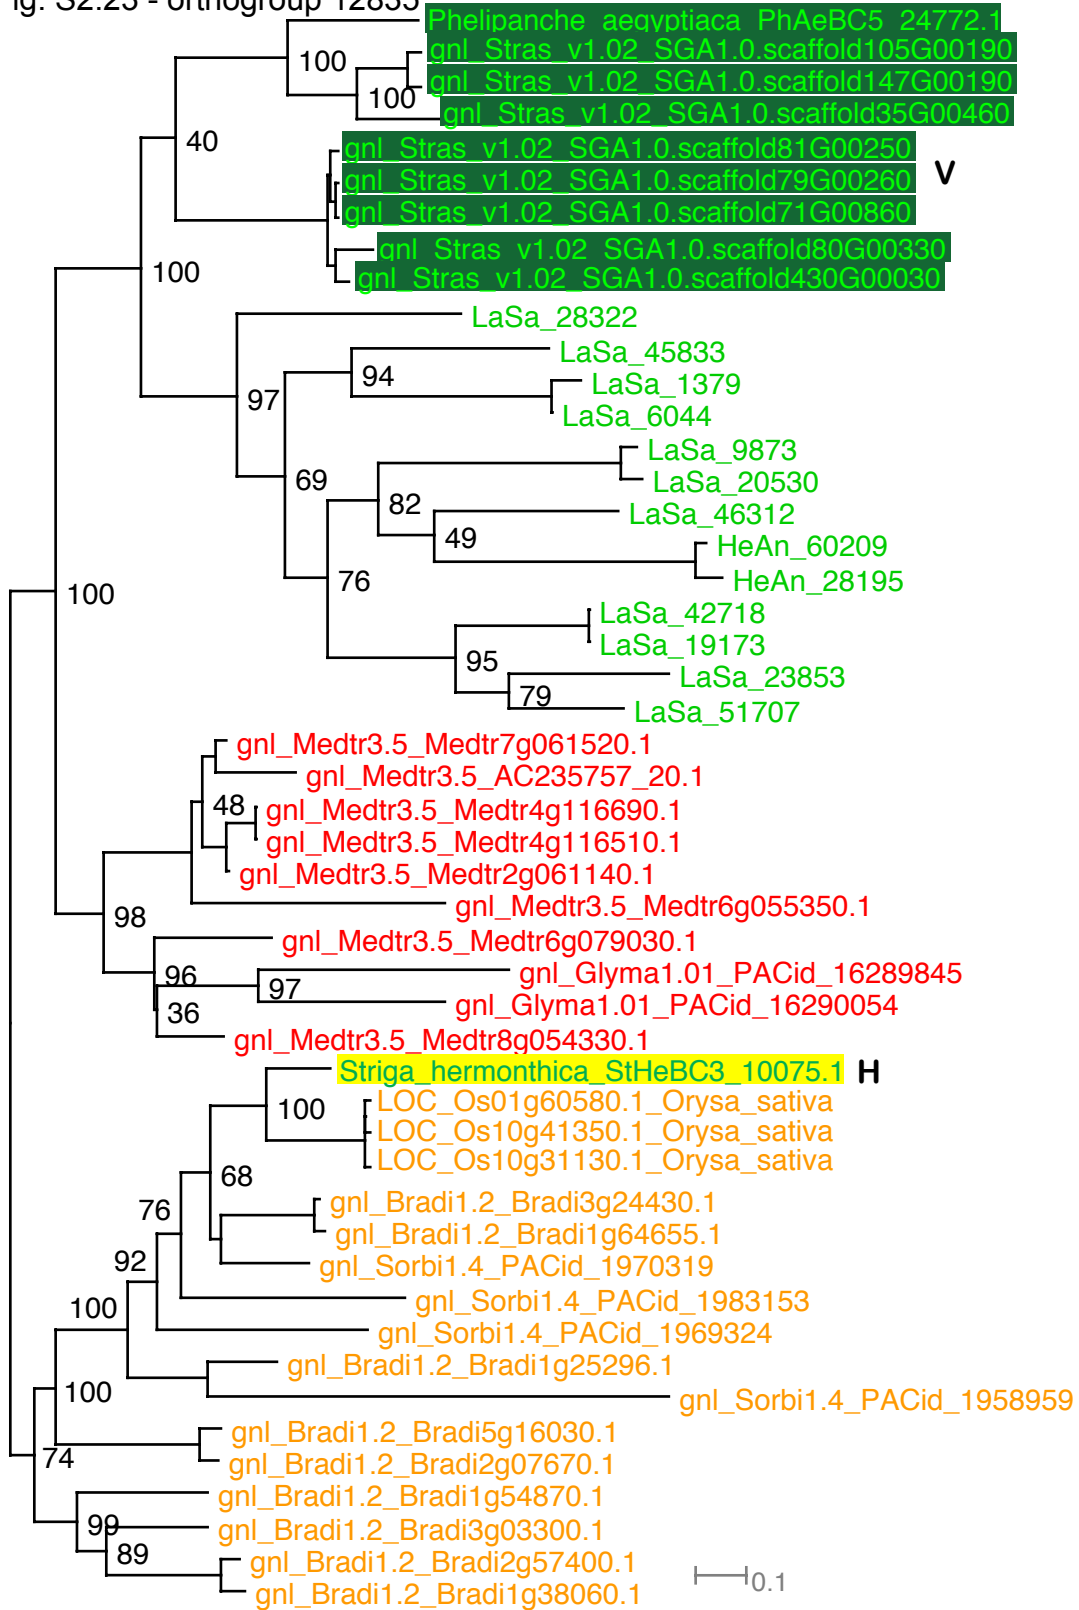



Fig. S2.24 - orthogroup 13512

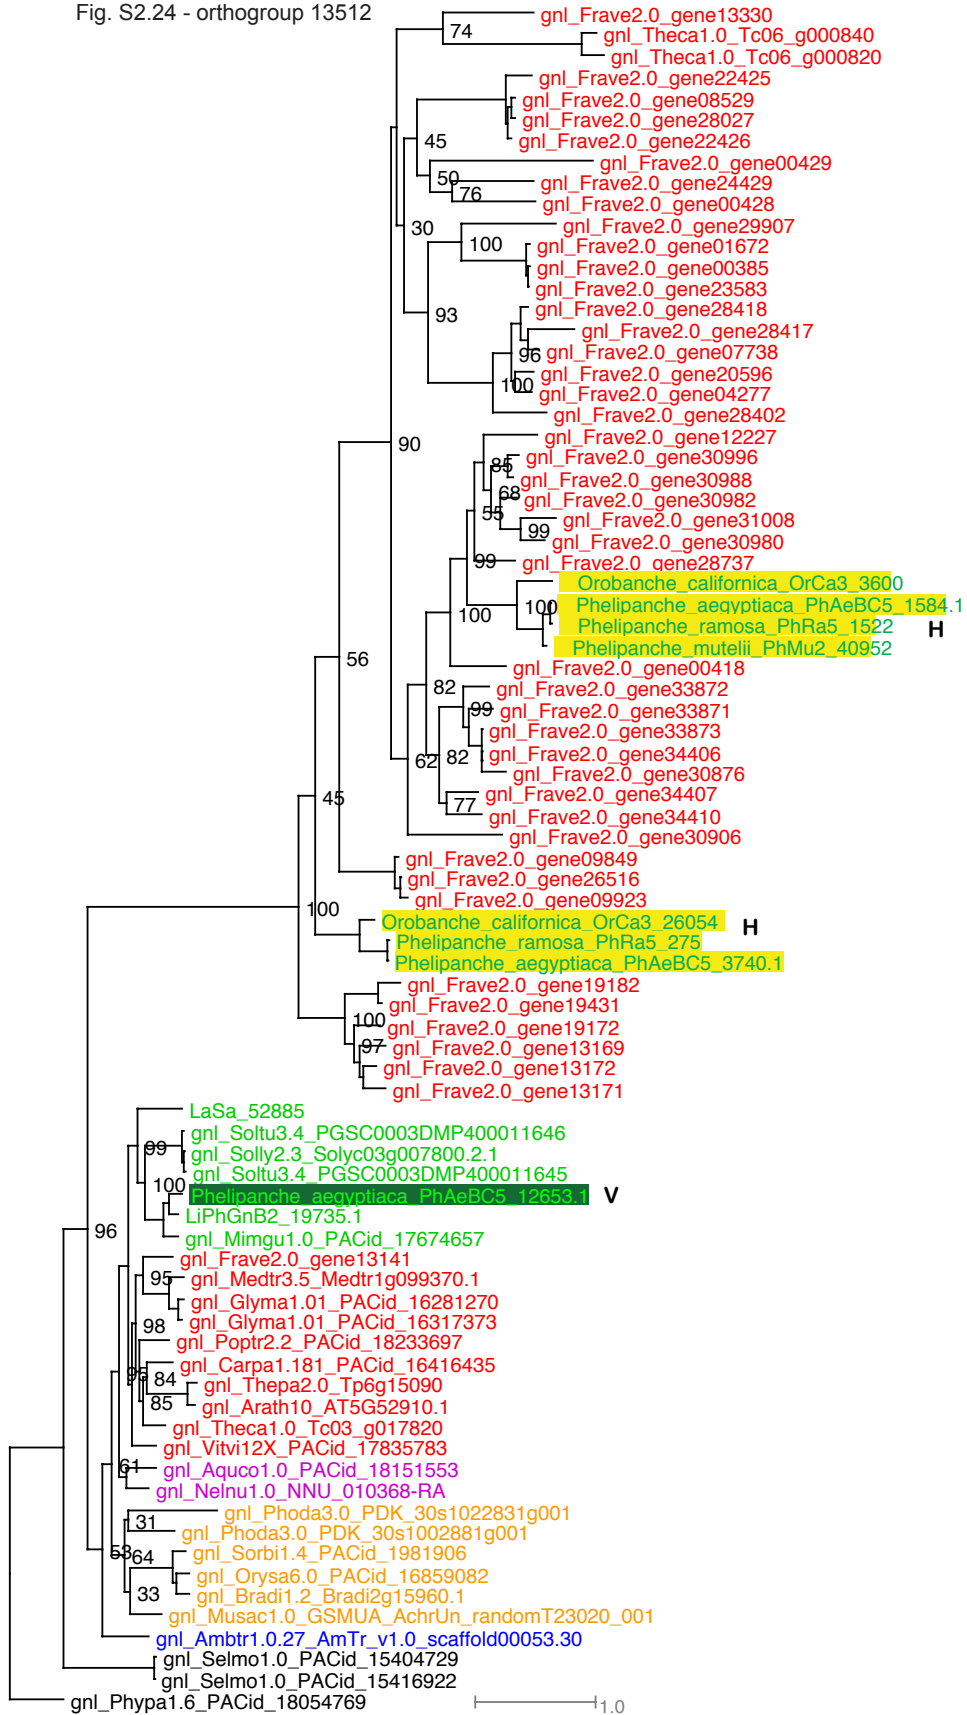

Fig. S2.25 - orthogroup 13656

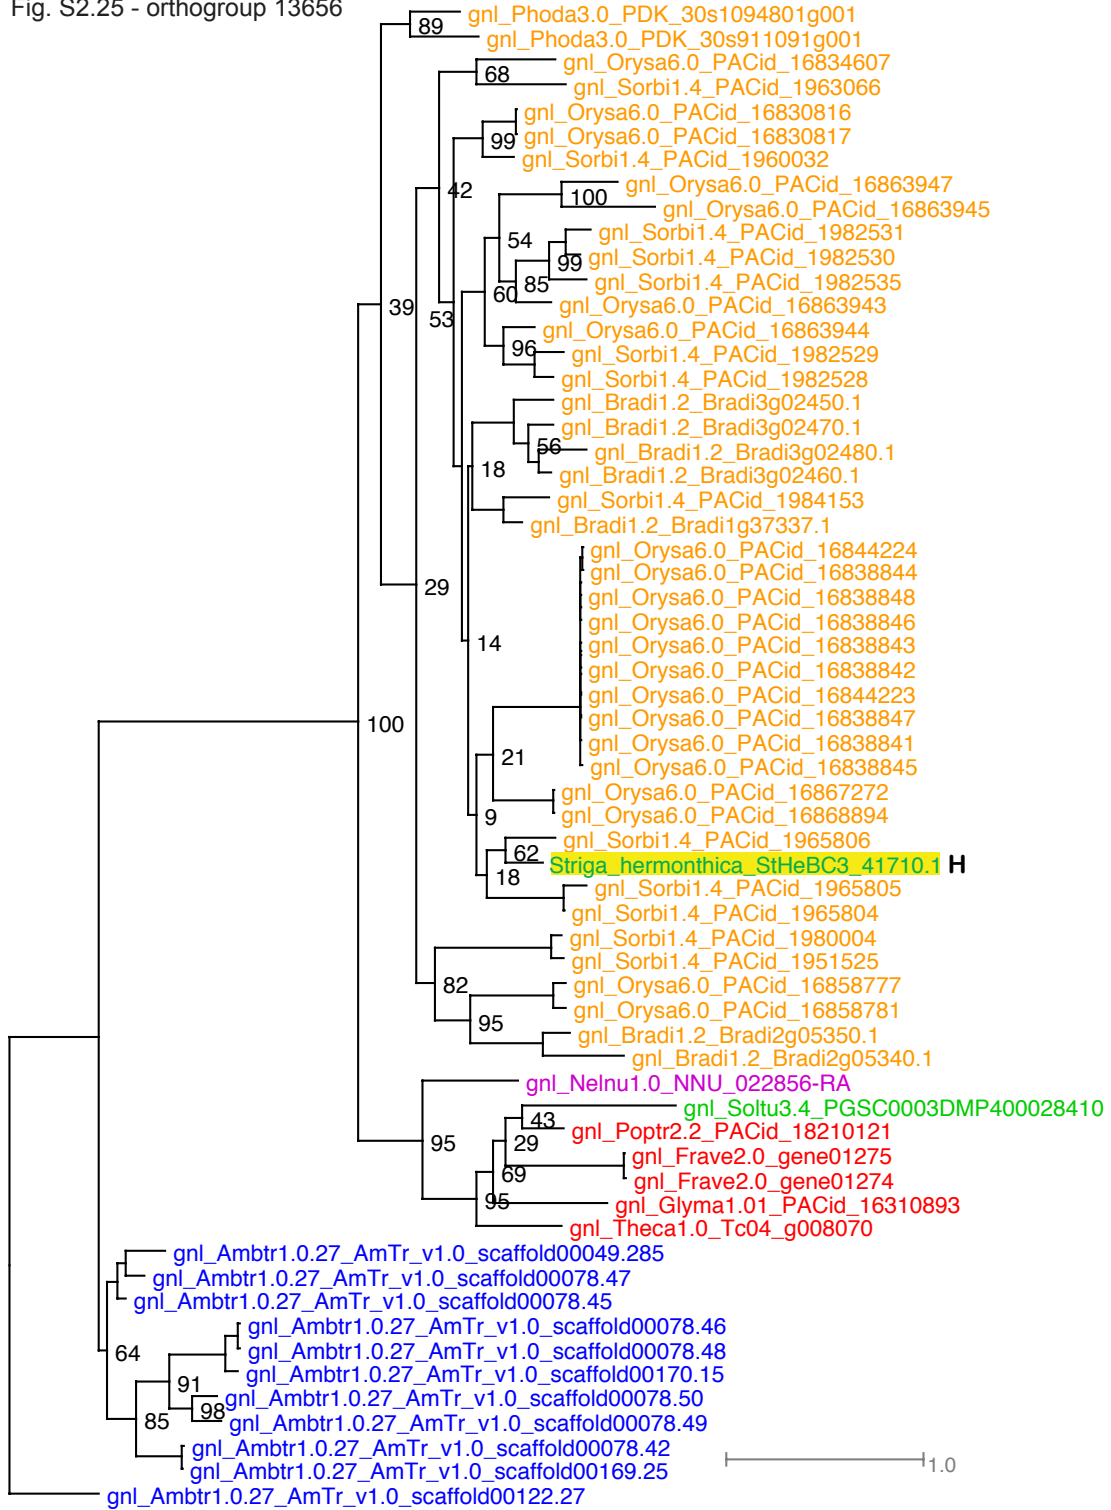

Fig. S2.26 - orthogroup 13892

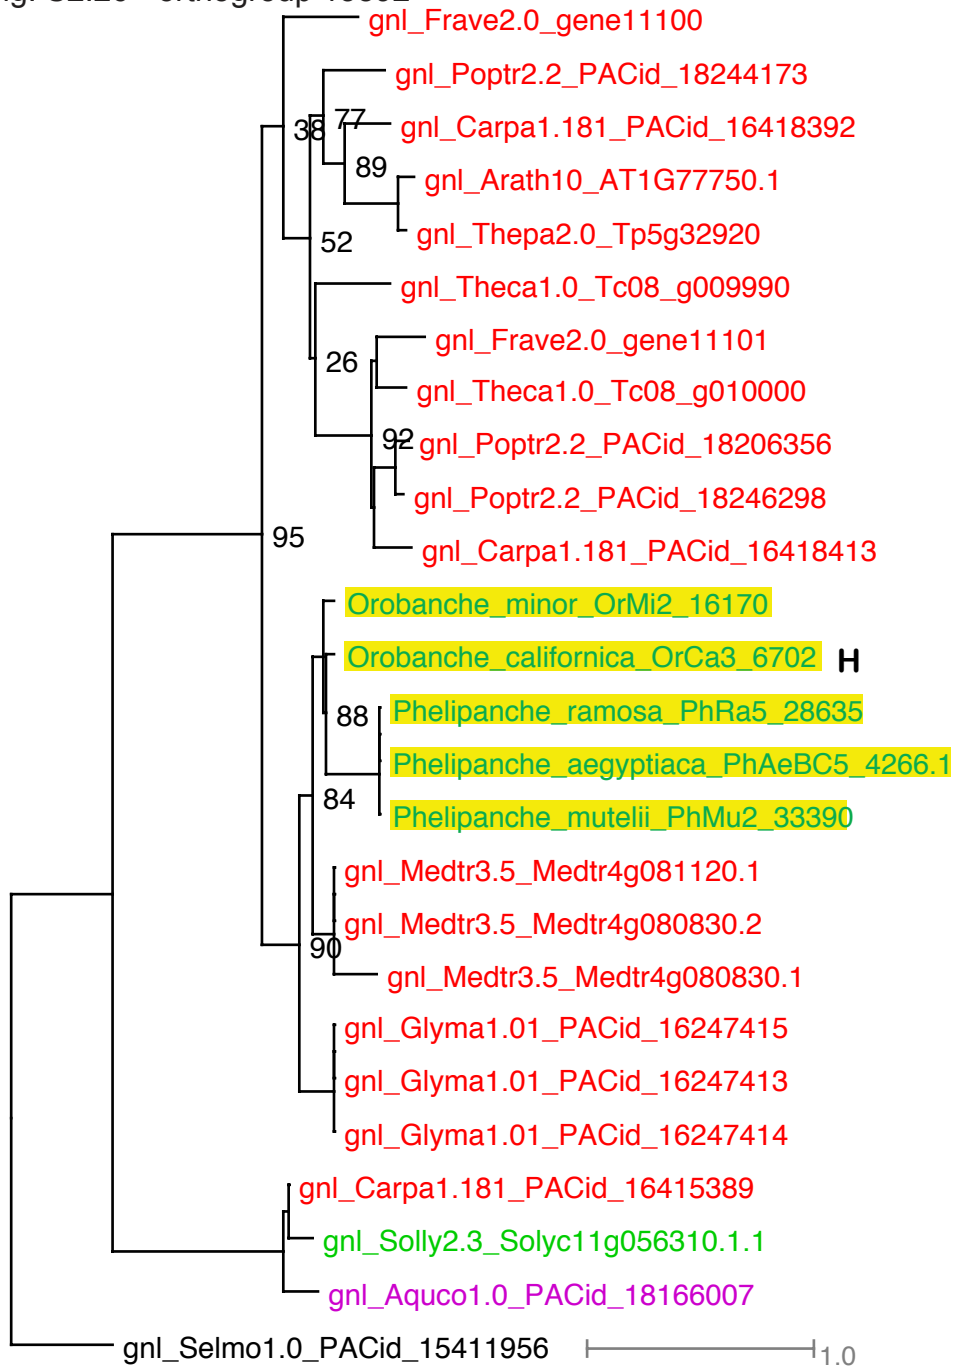

Fig. S2.27 - orthogroup 14230

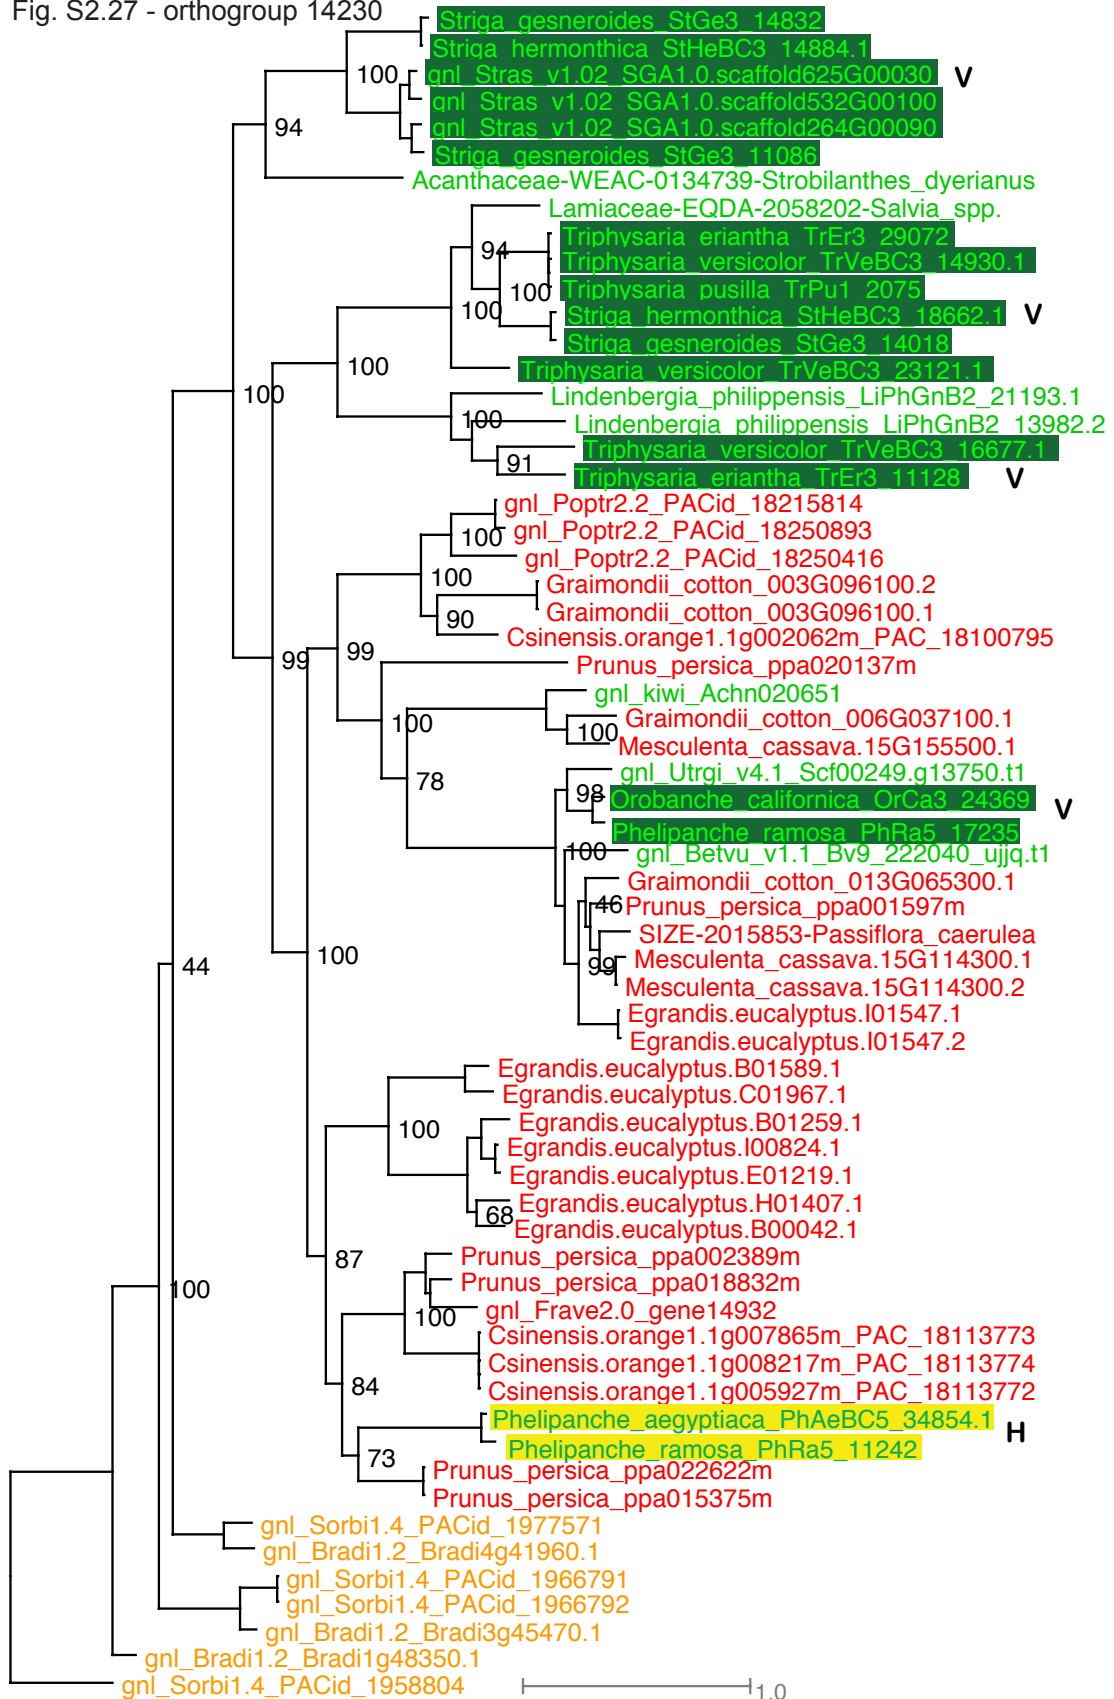

Fig. S2.28 - orthogroup 14233

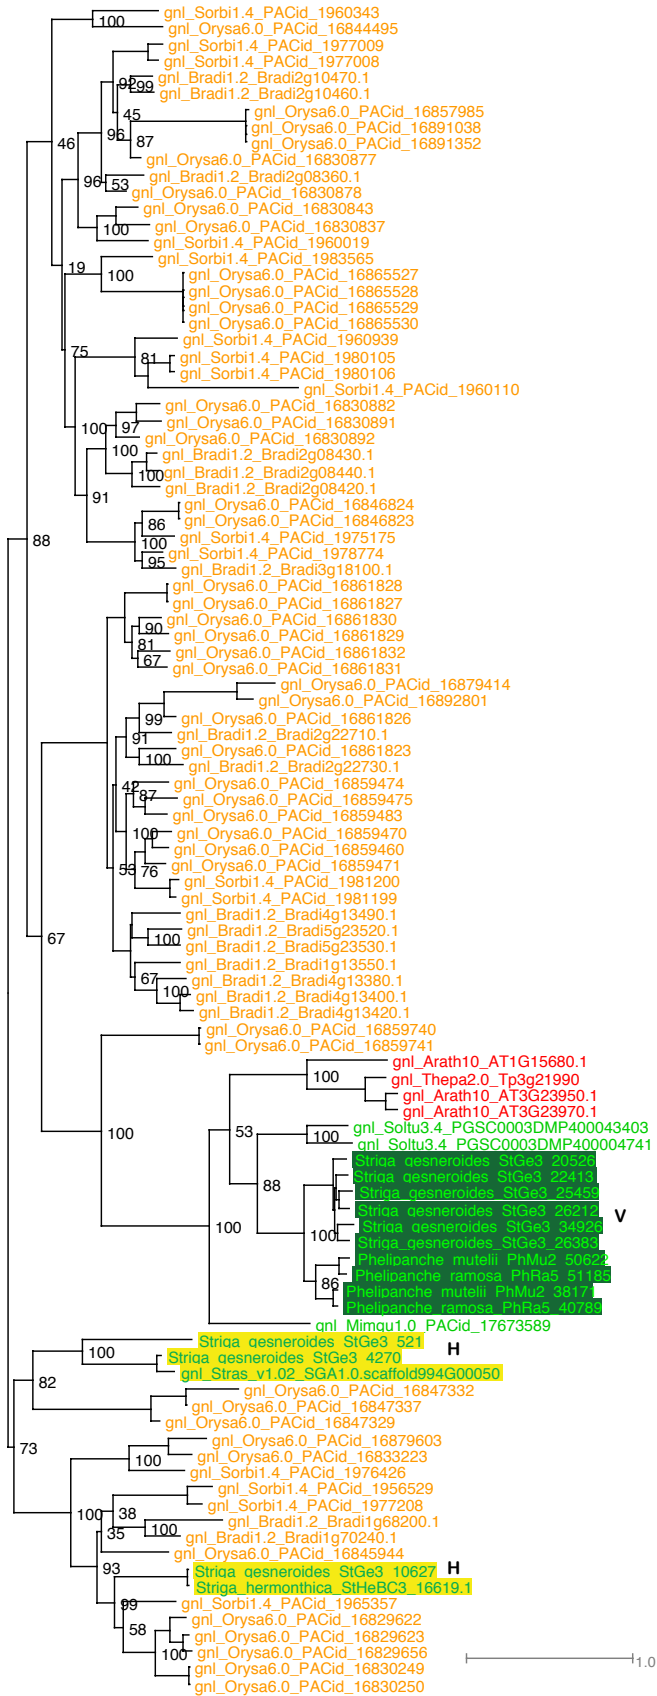

Fig. S2.29- orthogroup 14624

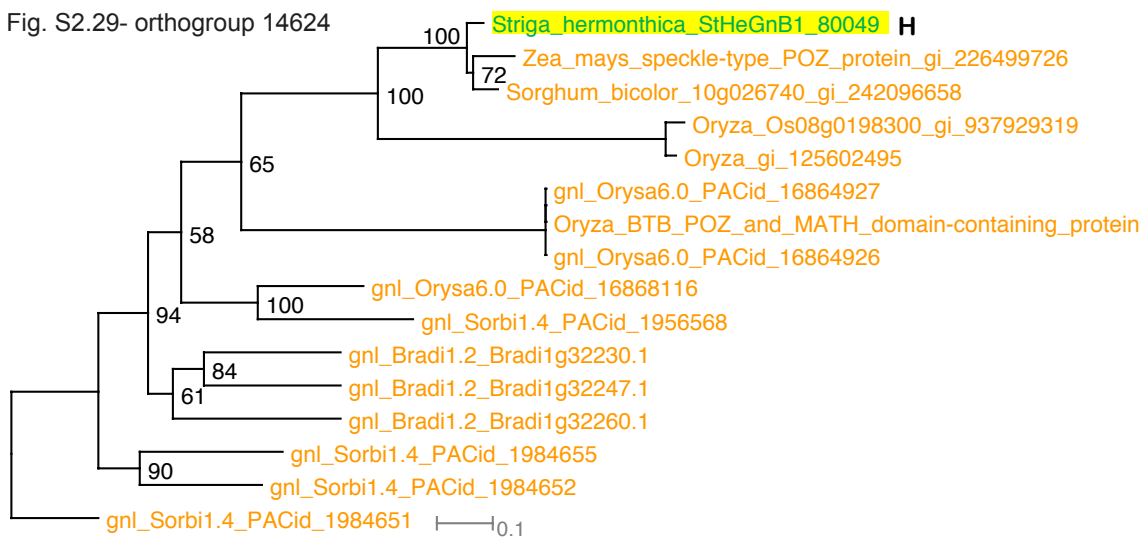

Fig. S2.30 - orthogroup 14675

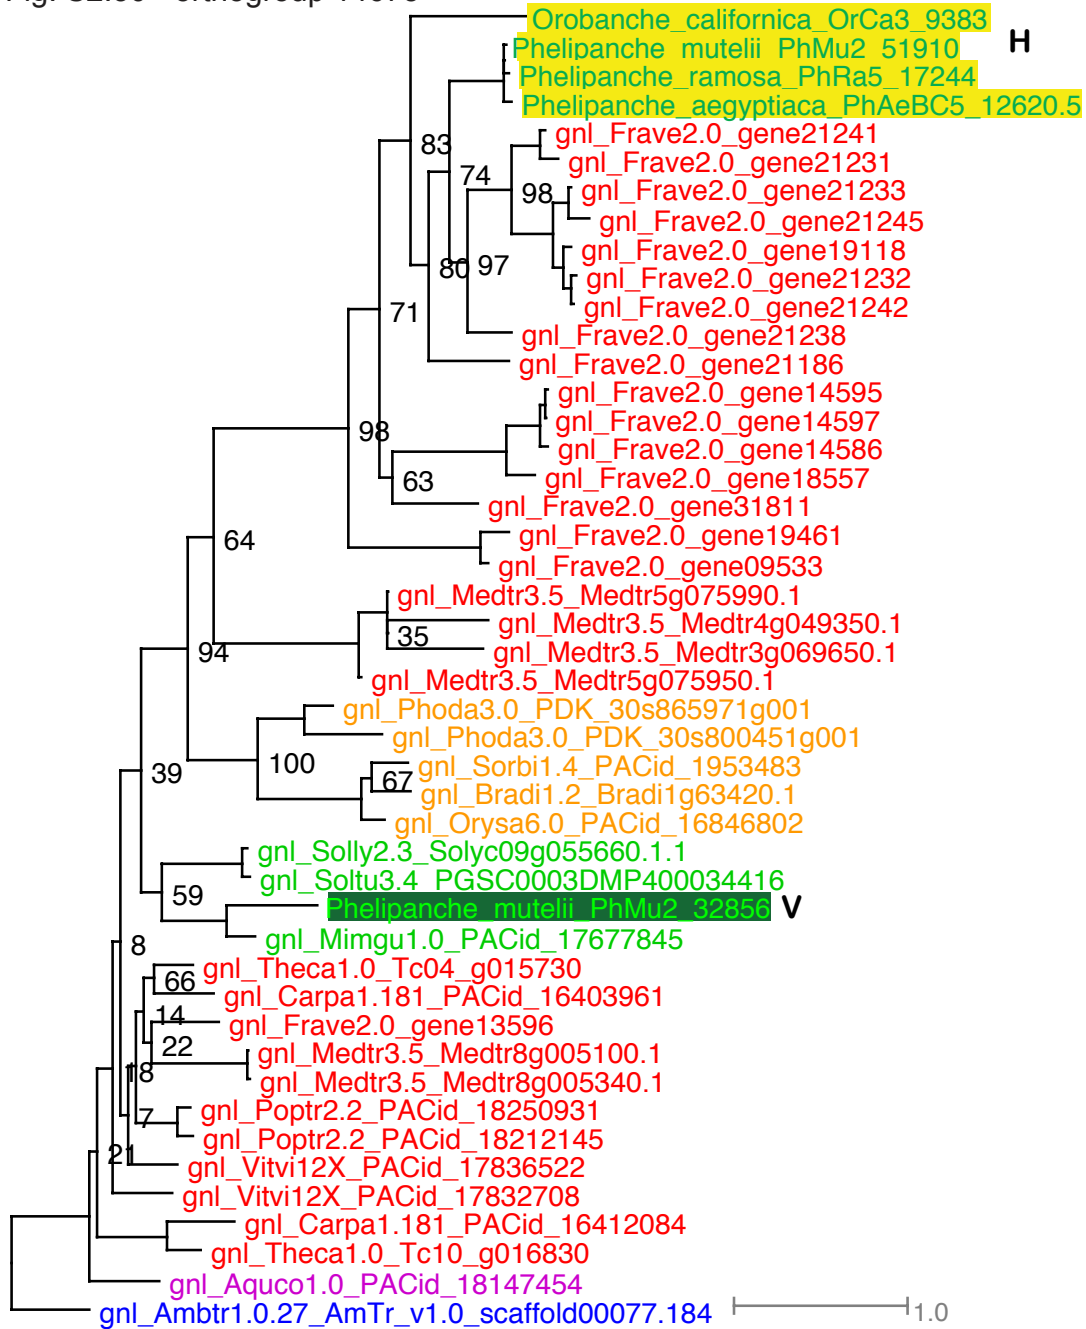

Fig. S2.31 - orthogroup 15149

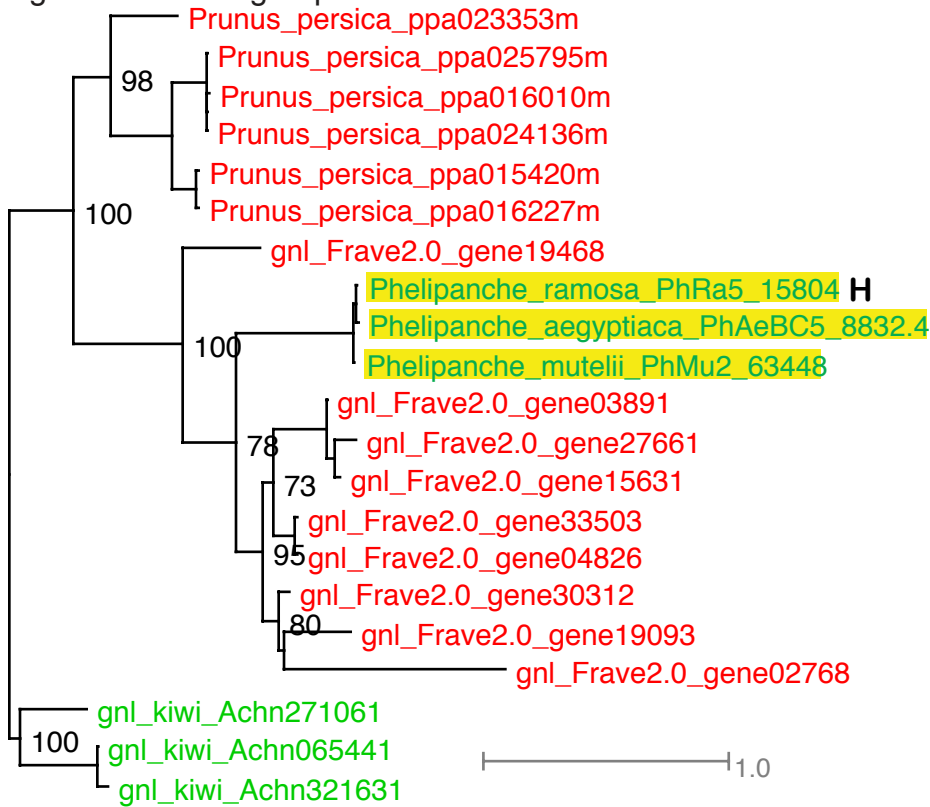

Fig. S2.32 - orthogroup 15246

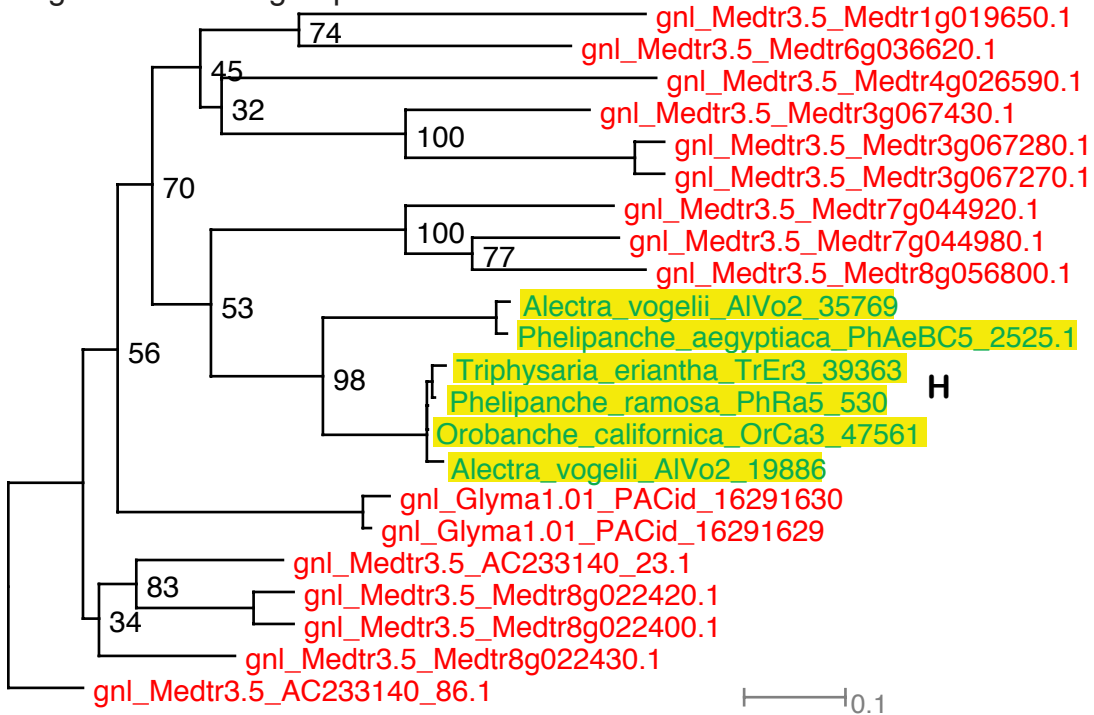



Fig. S2.33 - orthogroup 16703

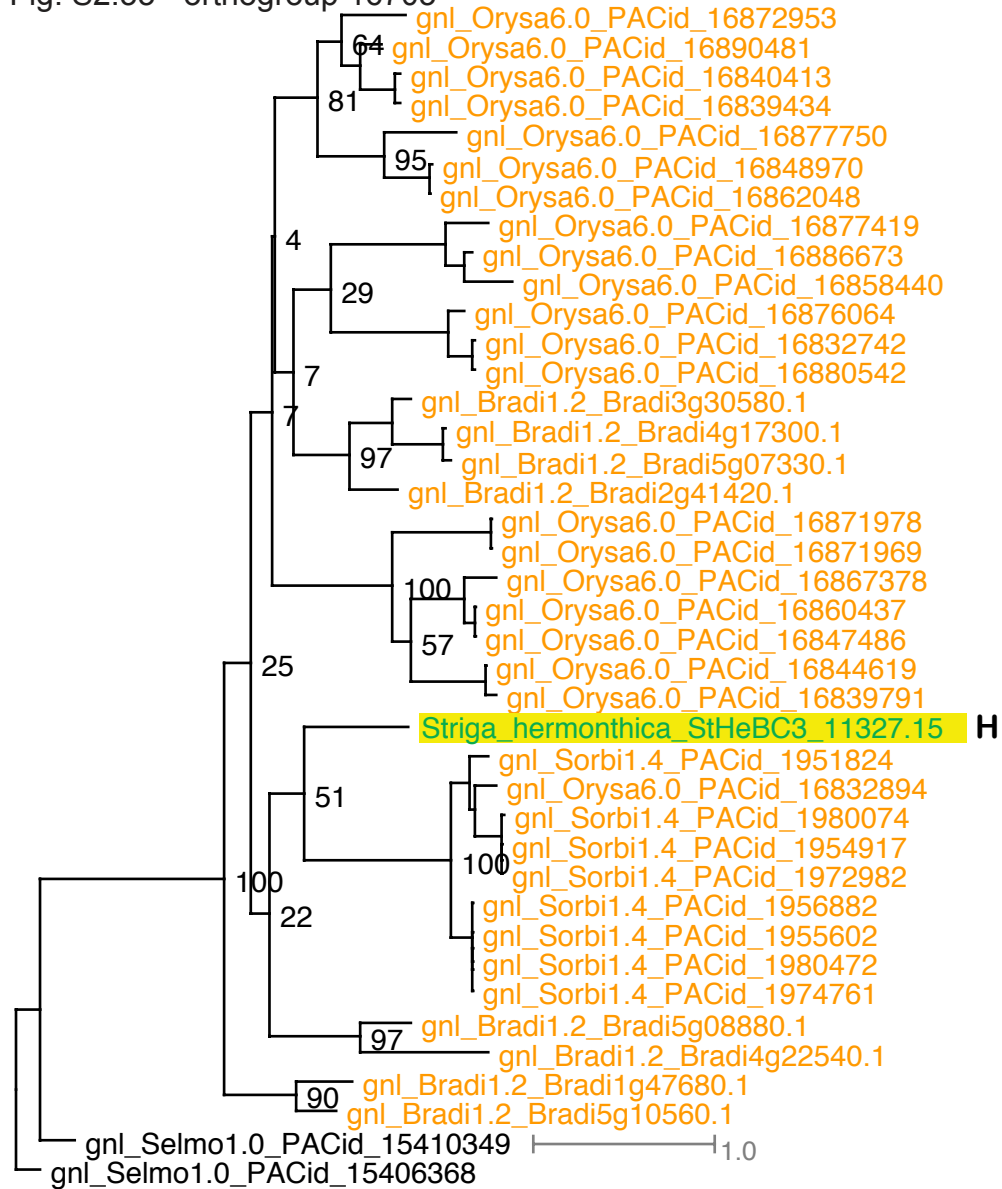

Fig. S2.34 - orthogroup 18354

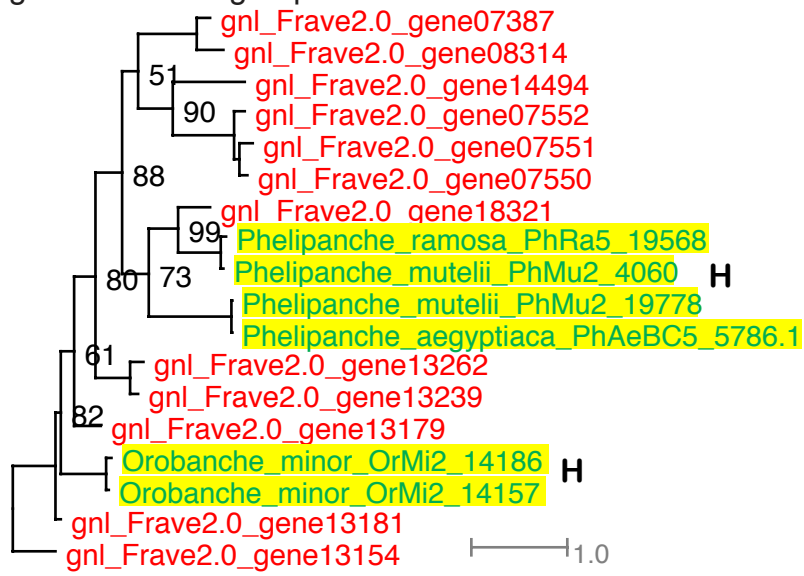

Fig. S2.35 - orthogroup 18709

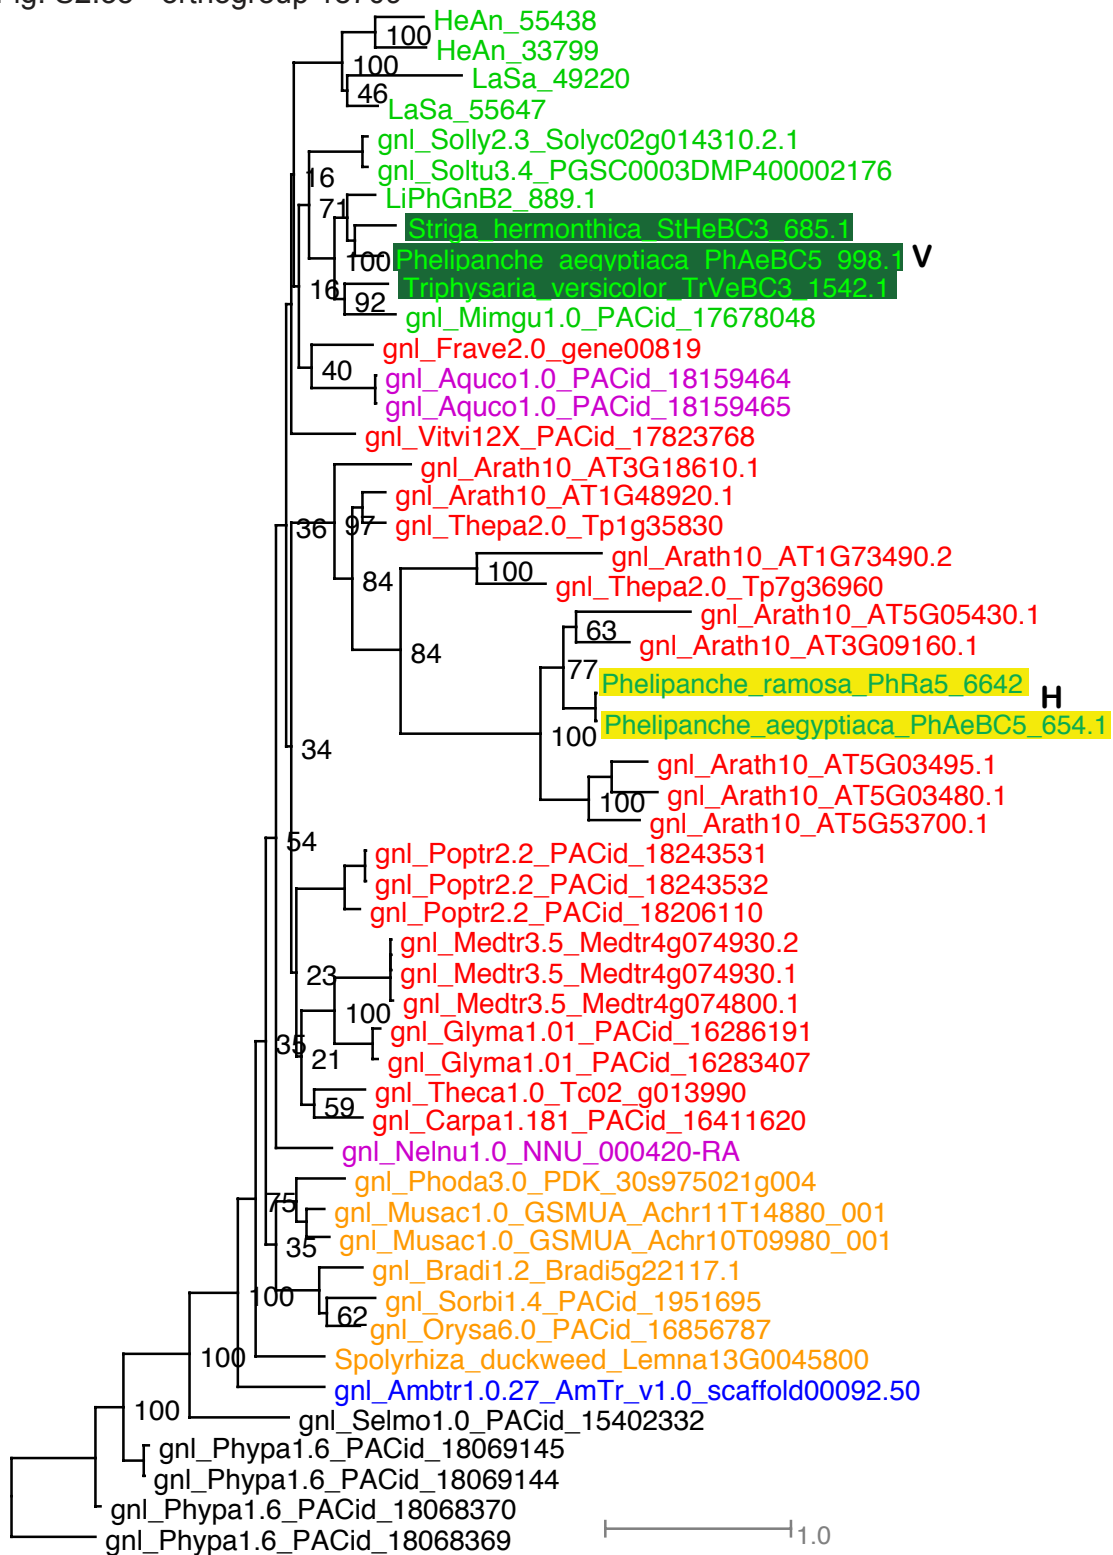

Fig. S2.36 - orthogroup 18774

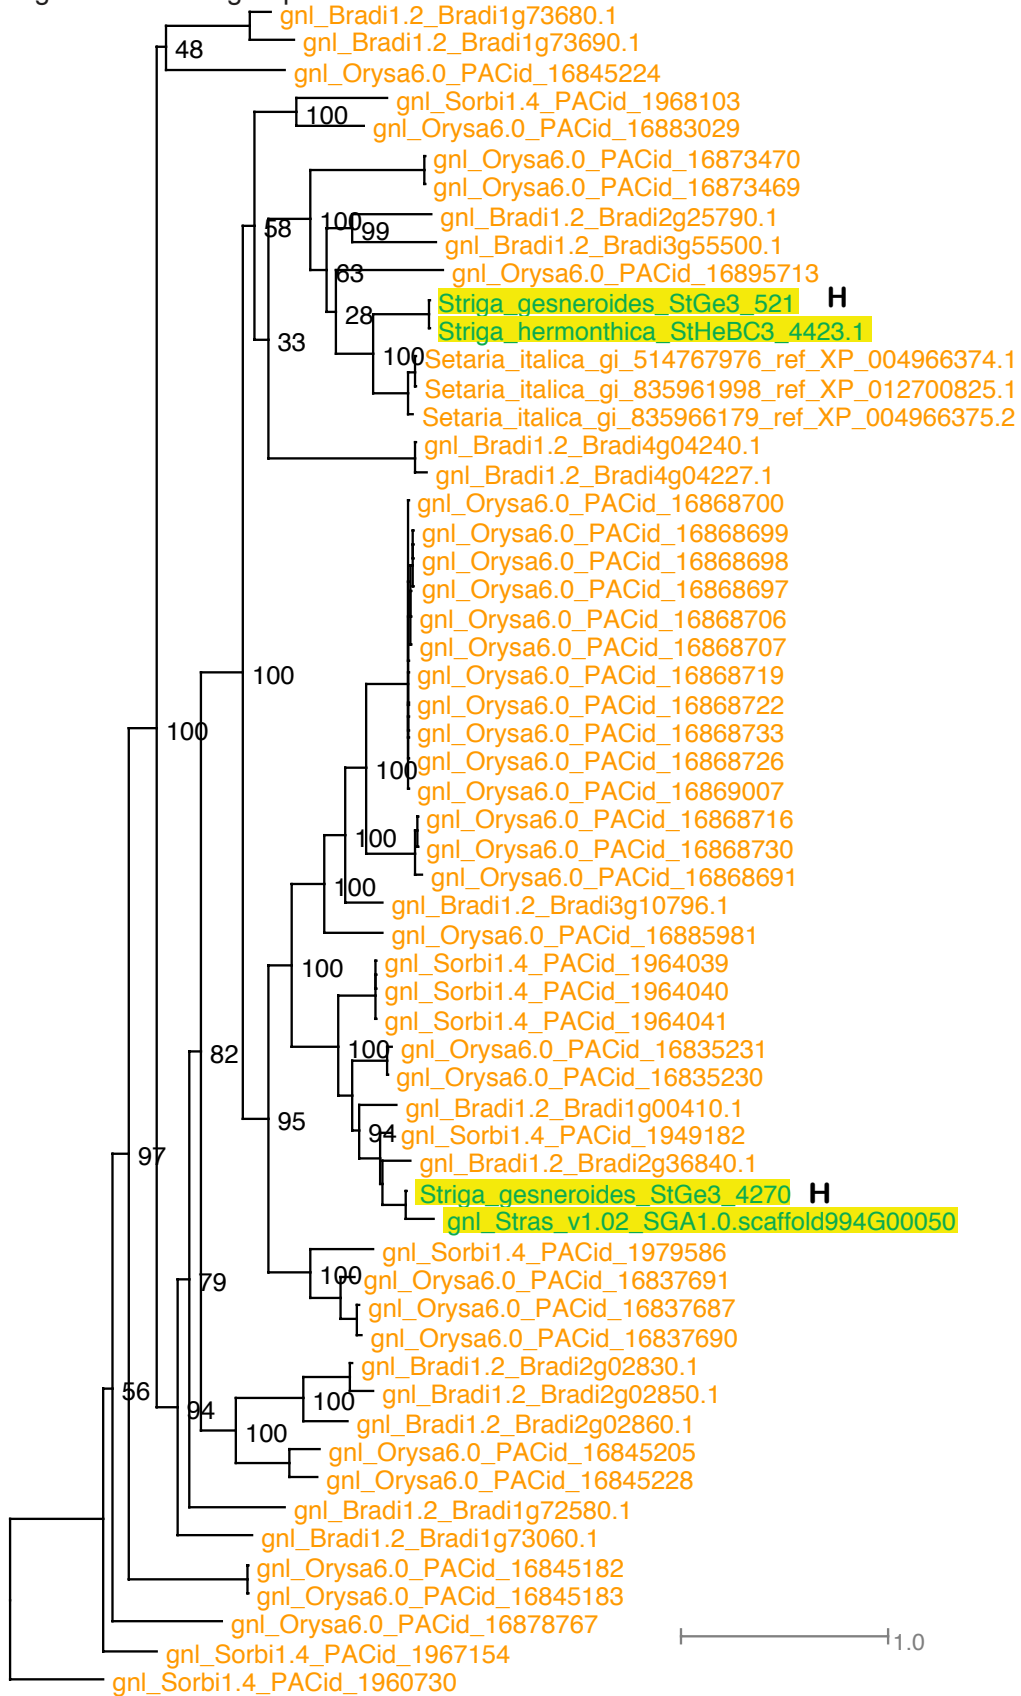

Fig. S2.37 - orthogroup 19297

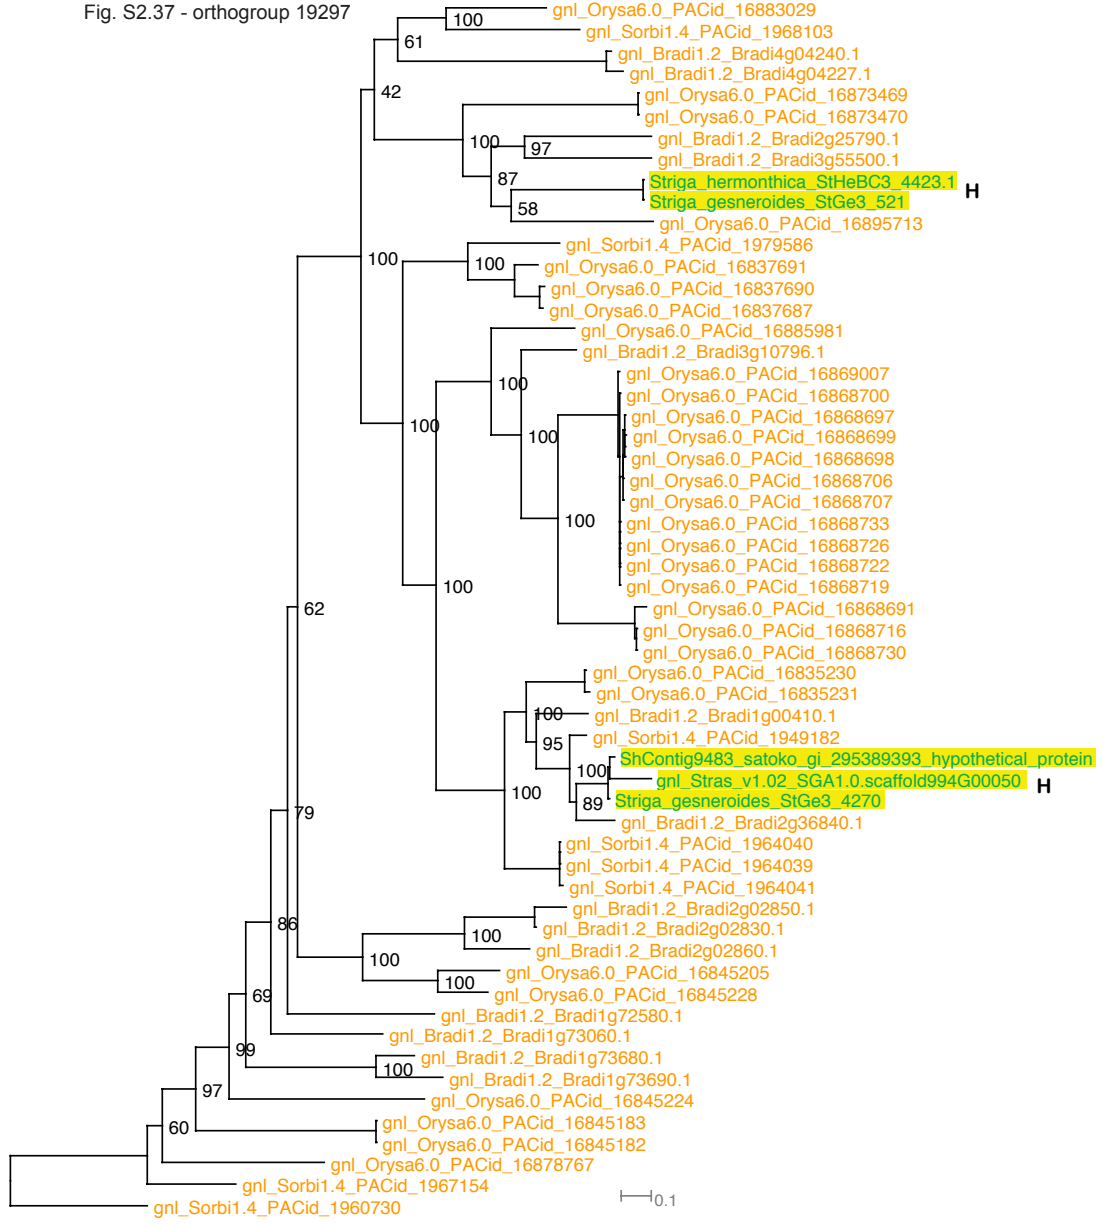

Fig. S2.38 - orthogroup 19696

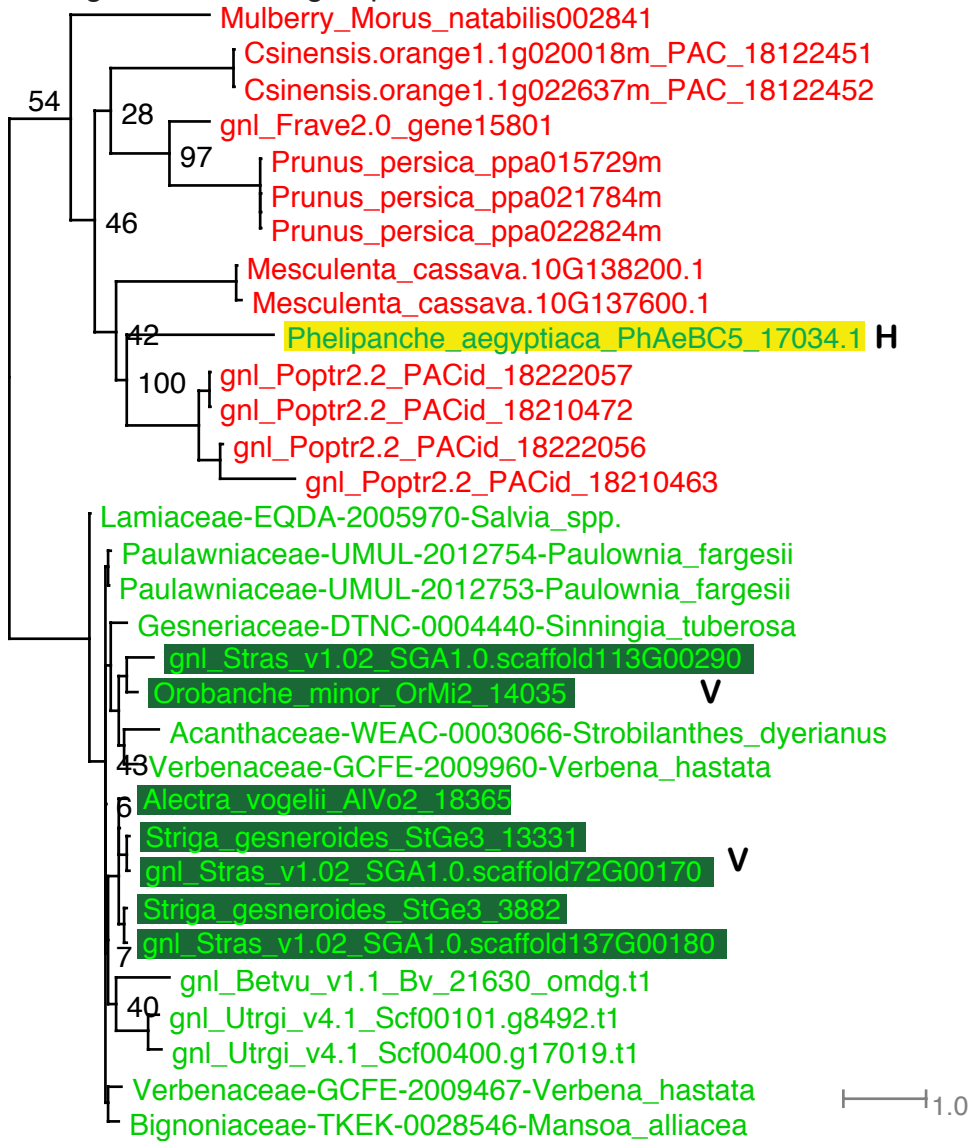

Fig. S2.39 - orthogroup 20188

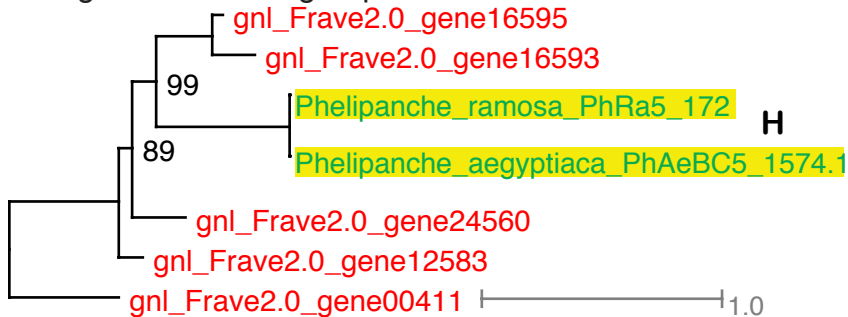

Fig. S2.40 - orthogroup 20190

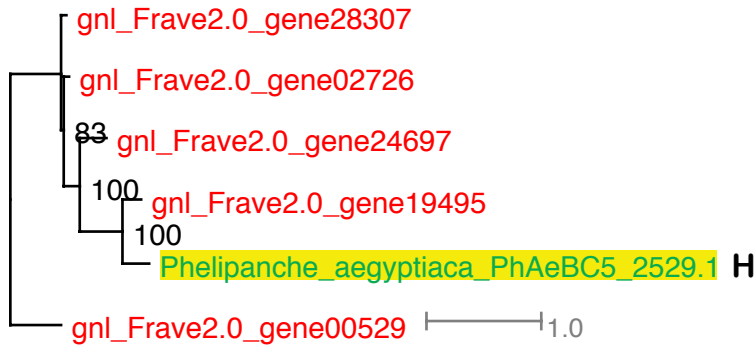

Fig. S2.41 - orthogroup 23343

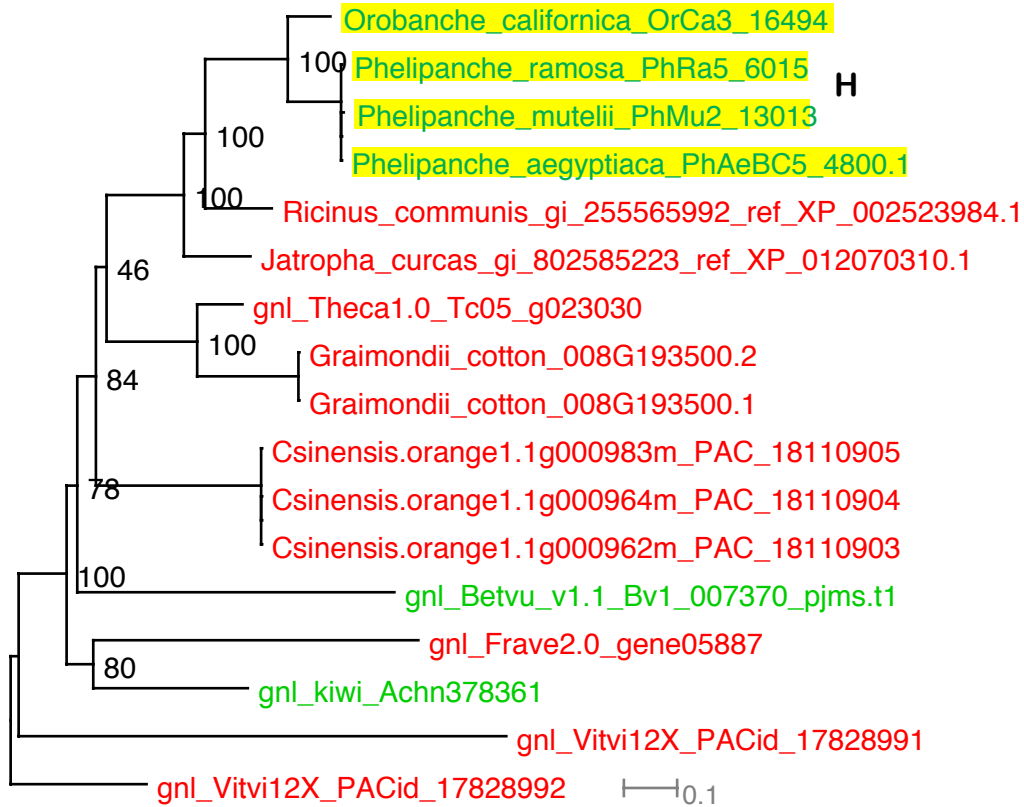

Fig. S2.42 - orthogroup 23480

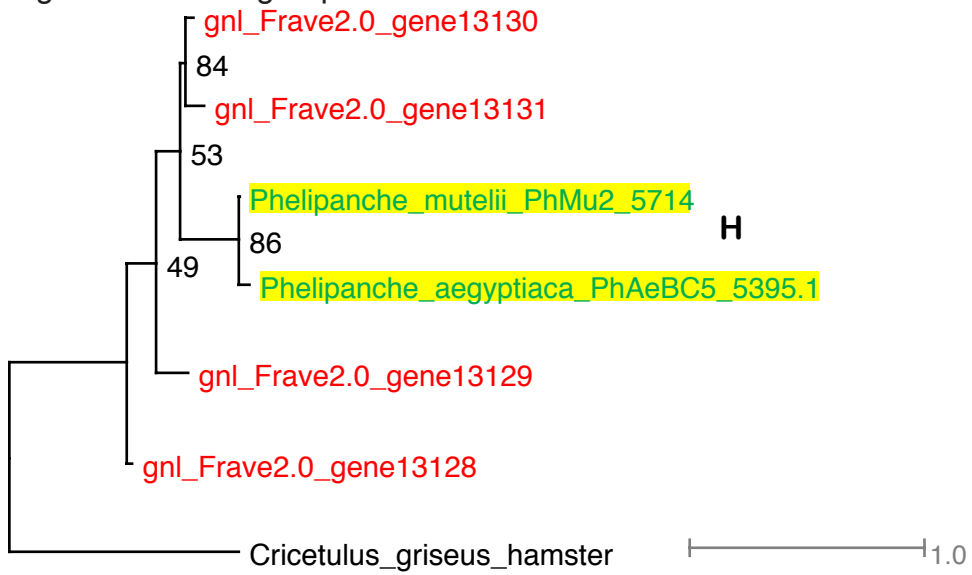

**Figure S2.** RAxML-based maximum likelihood trees for 42 HGT orthogroups. Yellow highlighting and “H” symbol refer to the HGT clade, green highlighting and “V” symbol refer to the vertical clade. The species are represented by "gnl\_" followed by the first three letters of the genus and first two letters of the species name, which can also be referred to in Fig. S1.



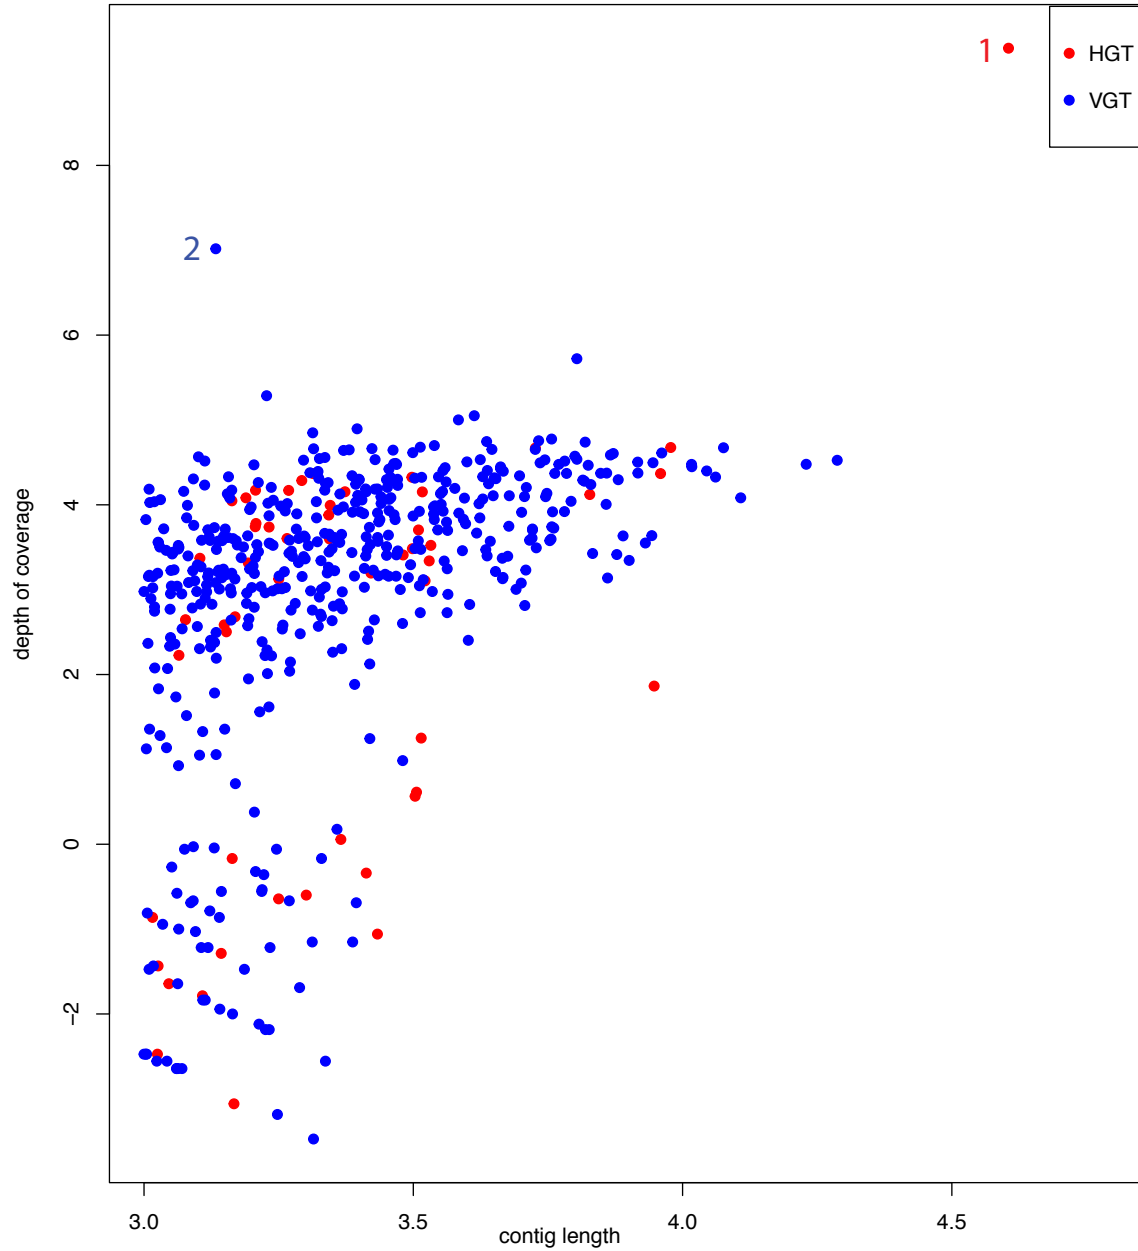

**Figure S3.** A stoichiometry plot showing the coverage of HGT genomic contigs and vertically transmitted genomic contigs. The X-axis is the log<sub>10</sub> transformed contig length (to remove noise, only contigs longer than 1kb were included), and the Y-axis is the log<sub>2</sub> transformed read depth of coverage. This analysis includes 56 HGT-derived genomic contigs, and 493 vertically transmitted genomic contigs from all three parasitic plants. Two high-coverage genomic contigs are labeled to show outliers: 1 is a mitochondrial genomic contig with much greater sequence depth than nuclear contigs, 2 is a highly-repetitive sequence.

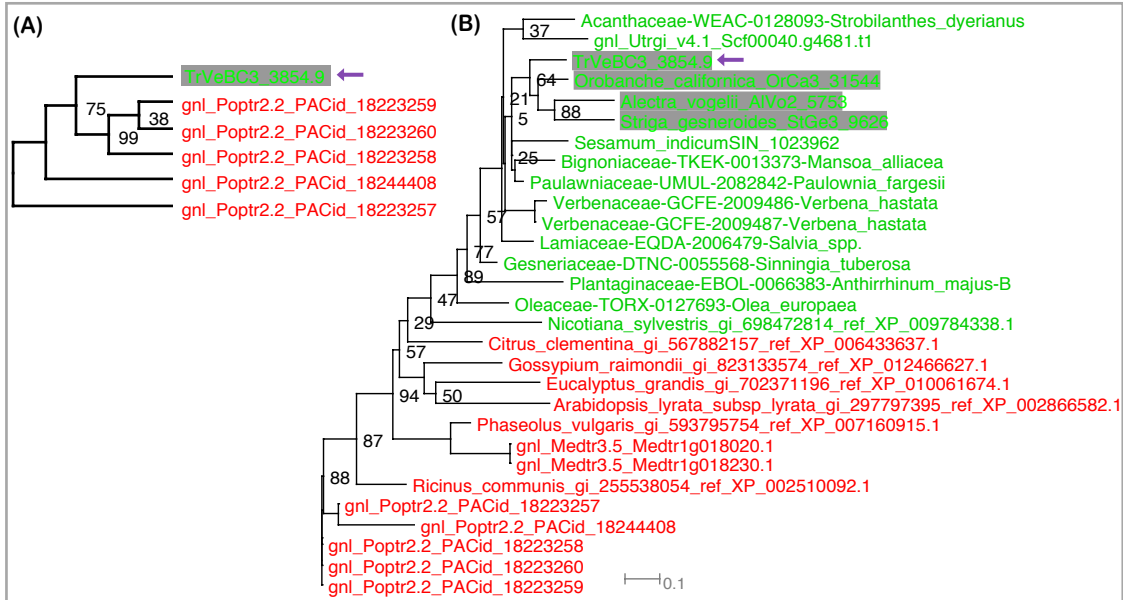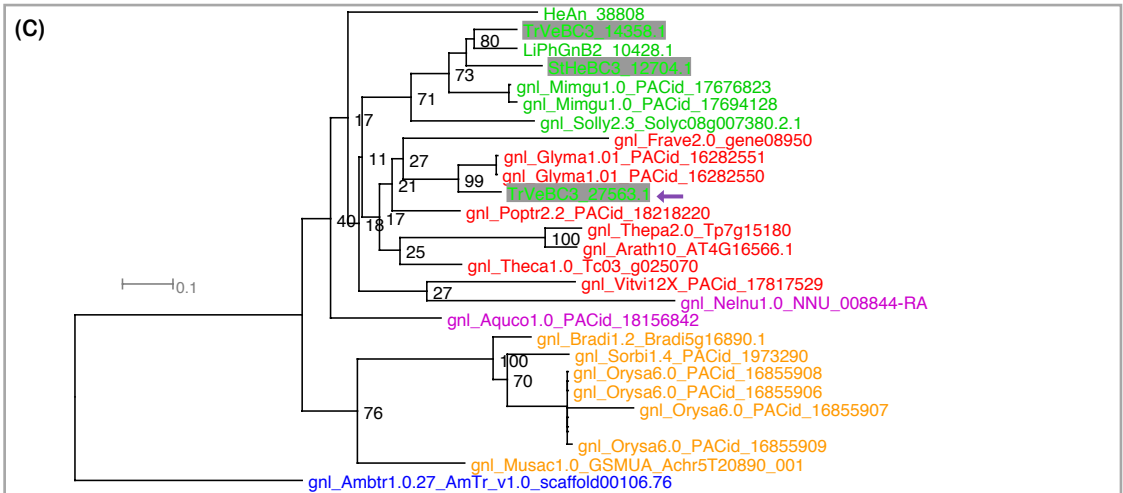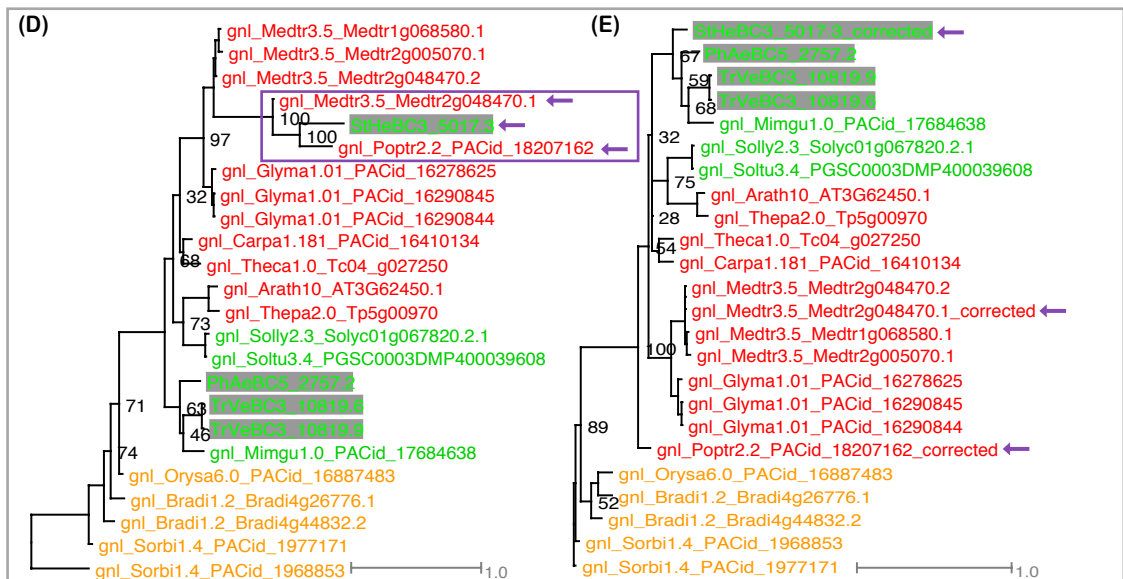

**Figure S4.** HGT artifacts due to insufficient taxon sampling (A-B), host plant contamination (C), and frame-shift errors (D-E). RAxML-based maximum likelihood tree for orthogroup 20348 from the initial automated pipeline (A) shows the placement of a *Triphysaria* gene (purple arrow; TrVeBC3\_3854.9) as a member of a rosid clade composed of many *Populus* sequences (Poptr), indicative of a potential HGT. (B) Increase of taxon sampling in the Lamiales order (green non-shaded) and the rosid groups (red) identifies the *Triphysaria* sequence (TrVeBC3\_3854.9) as a vertically transmitted gene which groups with its closely related parasitic taxa (green foreground, grey shading) in Lamiales. (C) Discovery of an unannotated host plant gene, rather than HGT (orthogroup 8224), explains the placement of the *Triphysaria* gene (TrVeBC3\_27563.1) with *Glycine max* (Glyma) sequences, a close relative of its experimental host – *Medicago truncatula*. (D-E) show an HGT artifact due to frame-shift errors in orthogroup 20348. (D) Purple branch shows a clade with long branch composed of three sequences – StHeBC3\_5017.3, gnl\_Medtr3.5\_Medtr2g048470.1, and gnl\_Poptr2.2\_PACid\_18207162. *Striga* sequence was identified in preliminary screening as a potential HGT sequence because of strong support for placement with a rosid donor. Careful examination of the alignment revealed frame-shift errors in all these three sequences, and correction of this error resolved the *Striga* gene as a vertical gene (E). The two rosid sequences from *Poplar* and *Medicago* also went to their expected positions within the rosid clades without long branches (E).

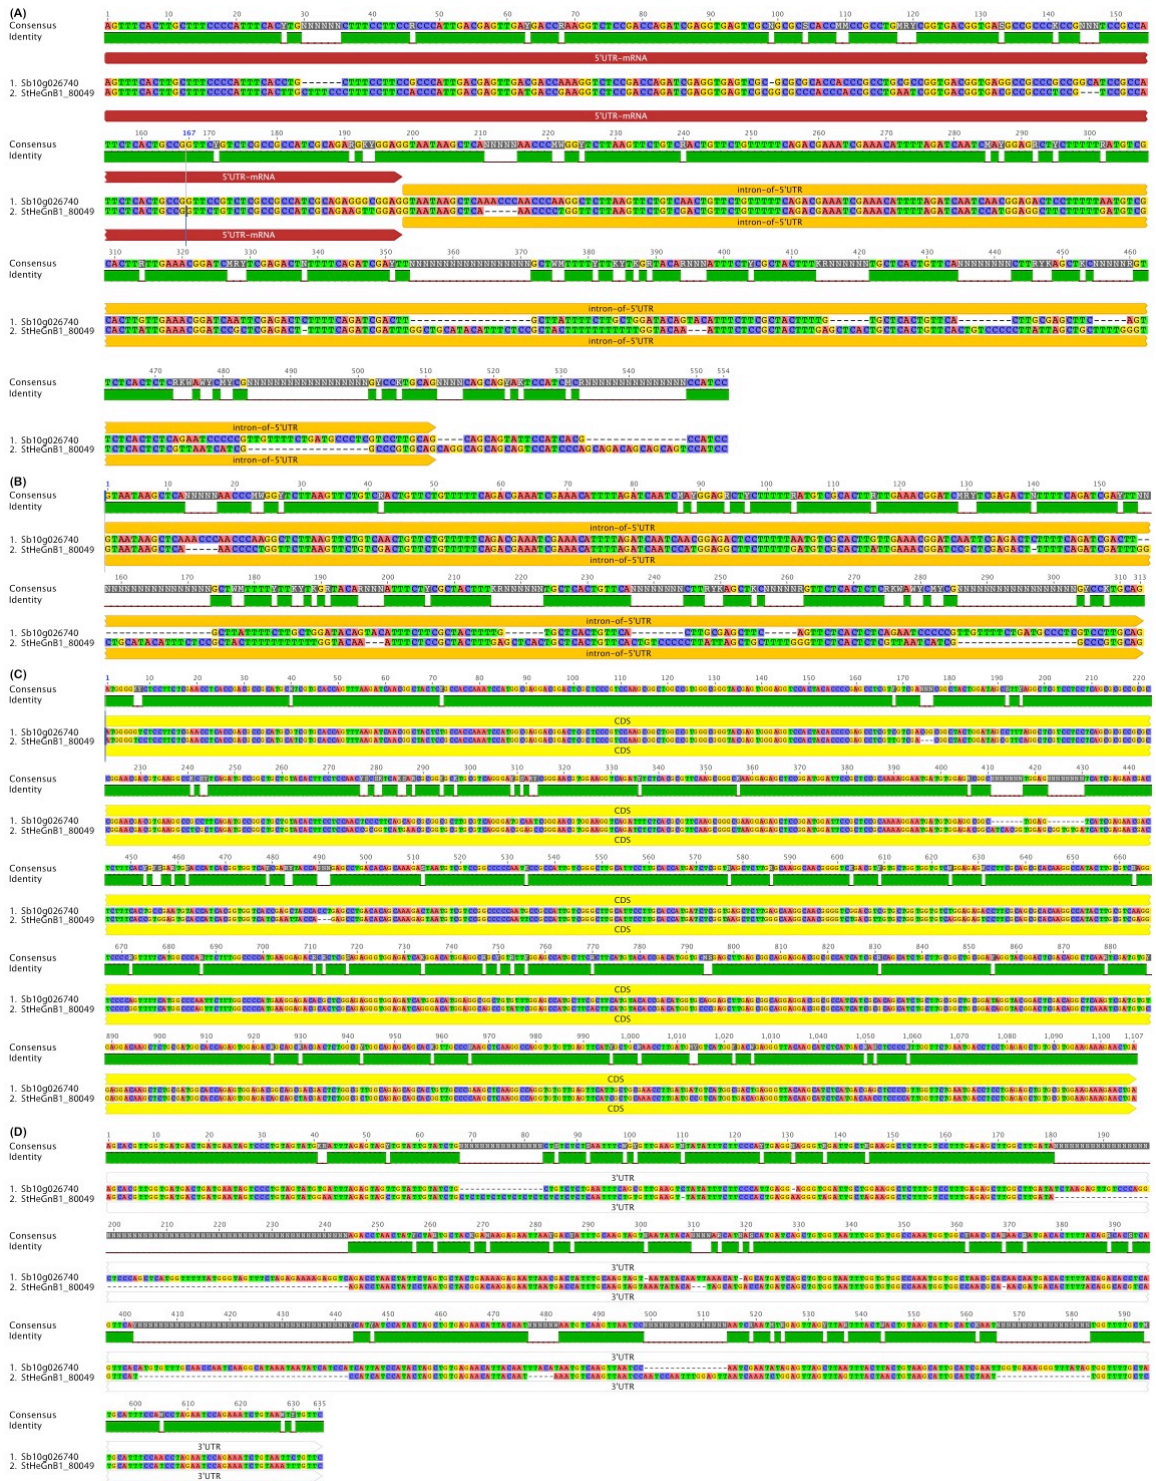

**Figure S5.** The conserved 5'-UTR intron shared between the donor represented by *Sorghum bicolor* gene Sb10g026740 and the HGT *Striga hermonthica* gene StHeGnB1\_80049 (orthogroup 14624). Geneious alignment view of the sequence alignment between the donor and recipient gene for 5'-UTR region (A), 5'-UTR intron (B), CDS (C), and 3'-UTR (D). The 5'-UTR intron was revealed by read mapping data.



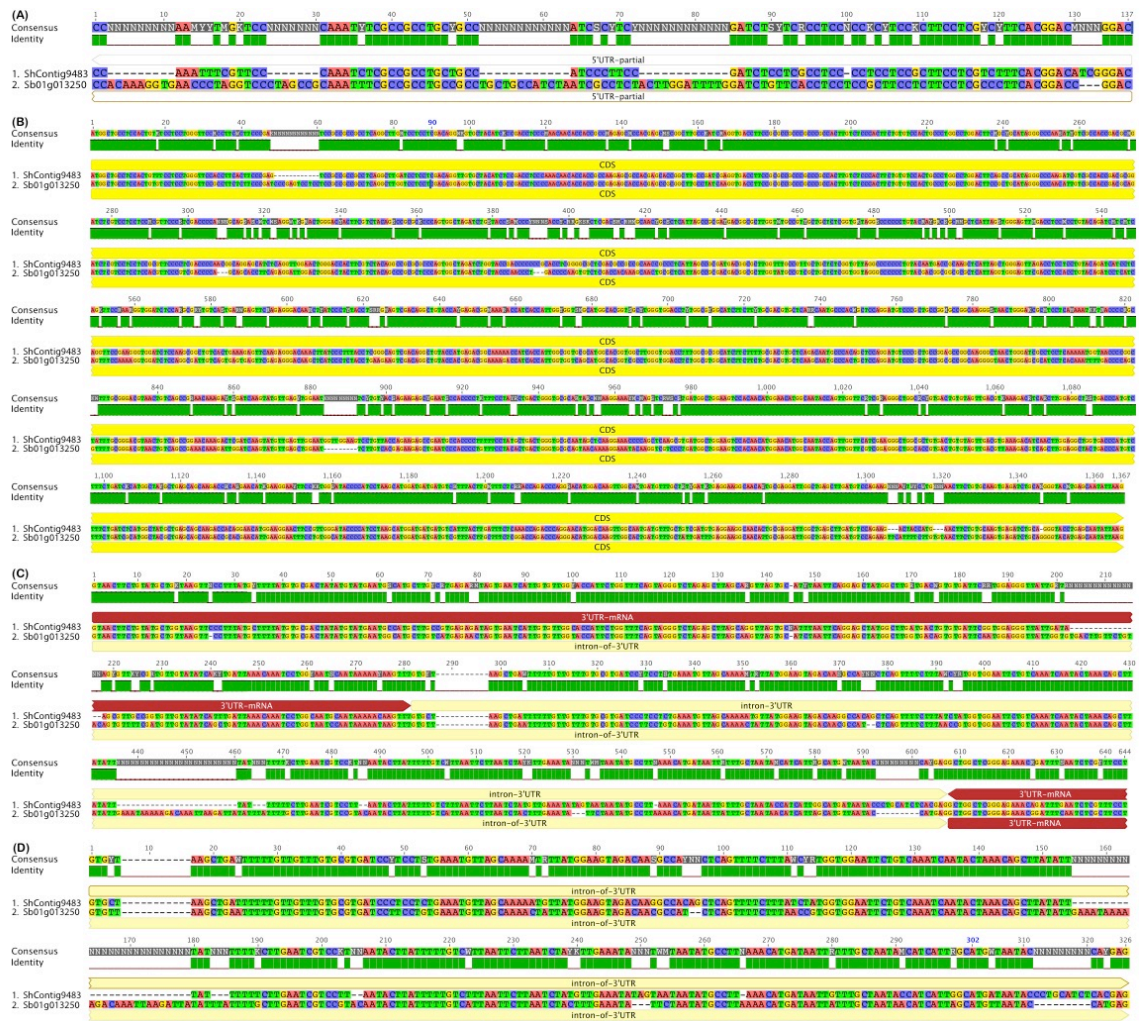

**Figure S6.** The conserved 3'-UTR intron shared between the donor represented by *Sorghum bicolor* gene Sb01g013250 and the HGT *Striga hermonthica* gene ShContig9483 (orthogroup 19297). Geneious alignment view of the sequence alignment between the donor and recipient gene for 5'-UTR region (A), CDS (B), 3'-UTR (C), and 3'-UTR intron (D). A shortened intron revealed in the parasitic *Striga* HGT gene, as shown in (C) where the N-terminal intron of the host gene resulted in unspliced transcribed mRNA in the 3'-UTR region. The 3'-UTR intron was revealed by read mapping data.

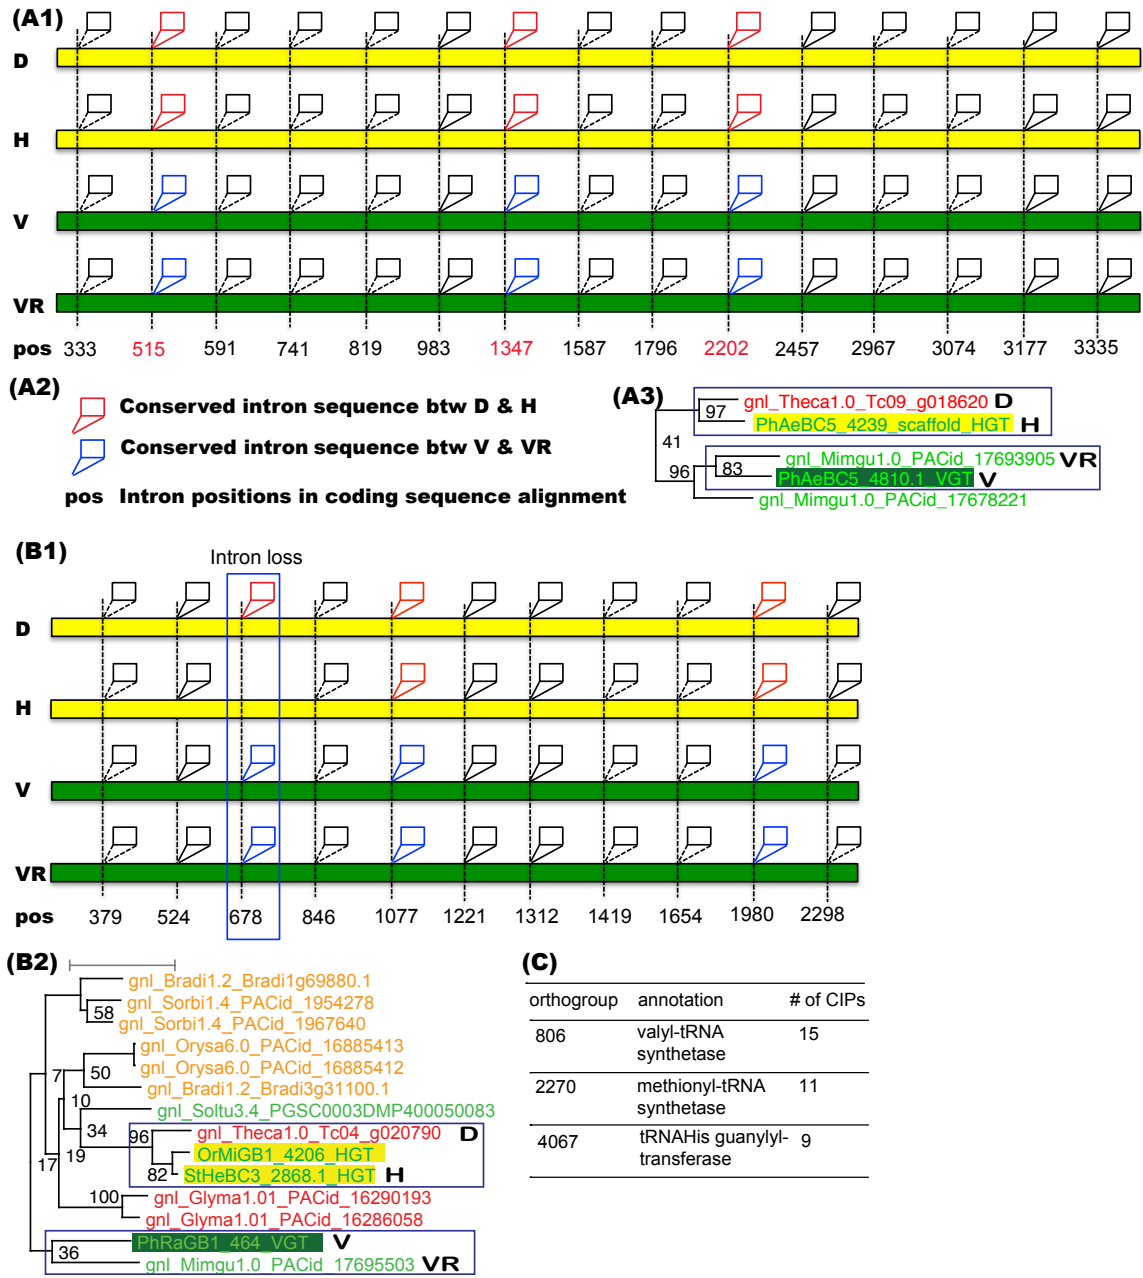

**Figure S7.** Intron phylogeny and intron-positions for three HGT orthogroups that encode tRNA synthetase/transferase. (A) and (B) show the conserved intron positions and intron sequence comparisons between two pairs of sequences: H (the HGT gene) and D (the represented donor), V (the vertical gene) and VR (the vertical sequence relative) (*Mimulus* sequence) (corresponding coding sequence phylogeny are shown in Fig. S1). (A1) (orthogroup 806) and (B1) (orthogroup 2270) show coding sequence alignment with introns marked with boxes. (A3) and (B2) show the intron sequence phylogenies supporting strong sequence similarity of two pairs, the HGT gene and its donor, the vertical gene and its vertical relative in *Mimulus*. Intron sequence phylogeny were made by the conserved introns colored in red and blue of (A1) and (B1). The intron origins match the coding sequence origin, supporting genomic transfers. (C) Annotation of three HGT orthogroups, all encoding tRNA synthetase/transferases involved in the attachment of the codon and tRNA anticodon. Also, the number of conserved intron positions (CIPs) in the forced CDS alignment were also shown, 4067 is the orthogroup in main Figure 3 that also encodes tRNA<sup>His</sup> transferase.

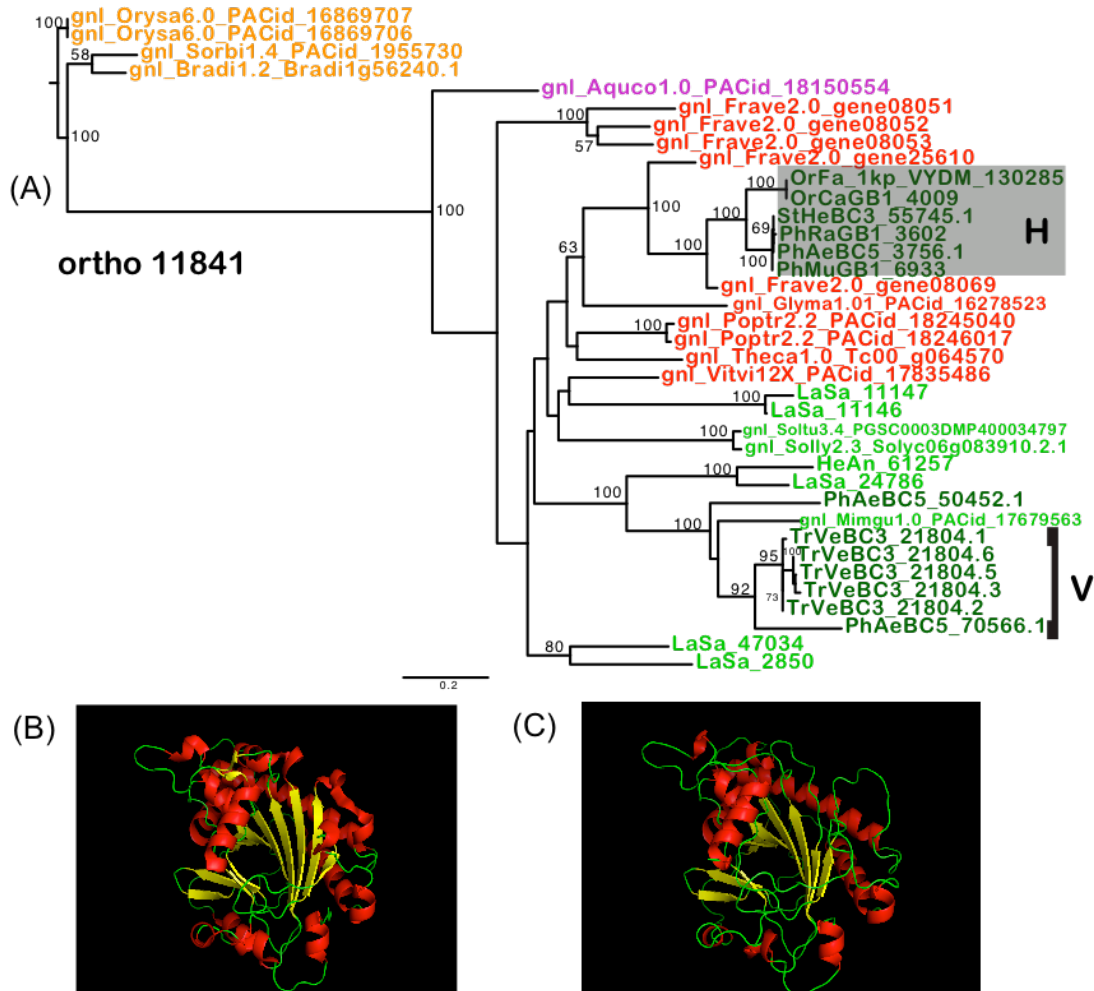

**Figure S8.** Phylogeny of orthogroup 11841 and predicted 3D structure. The HGT genes identified are PhAeBC5\_3756.1 in *Phelipanche aegyptiaca* and StHeBC3\_55745.1 in *Striga hermonthica*. For this particular orthogroup, the HGT gene was also identified in *Orobancha fasciculata* (OrFa\_1kp\_VYDM\_130285) from the 1KP database. Additional Orobanchaceae orthologs were also found through shallow transcriptome sequencing of additional species, including *Myzorrhiza californica* (OrCaGB1\_4009), *Phelipanche ramosa* (PhRaGB1\_3602) and *Phelipanche mutellii* (PhMuGB1\_6933). HGT and vertical clade was labeled with “H” and “V” respectively on the phylogeny. (A). phylogeny of orthogroup 11841 supporting HGT; (B). Protein 3D structure of Anthocyanidin synthase from *Arabidopsis thaliana* (PDB ID: 1GP4); (C). Predicted protein 3D structure of PhAeBC5\_3756.1. Color scheme: alpha helices shown in red; beta sheets shown in yellow; loops shown in green.

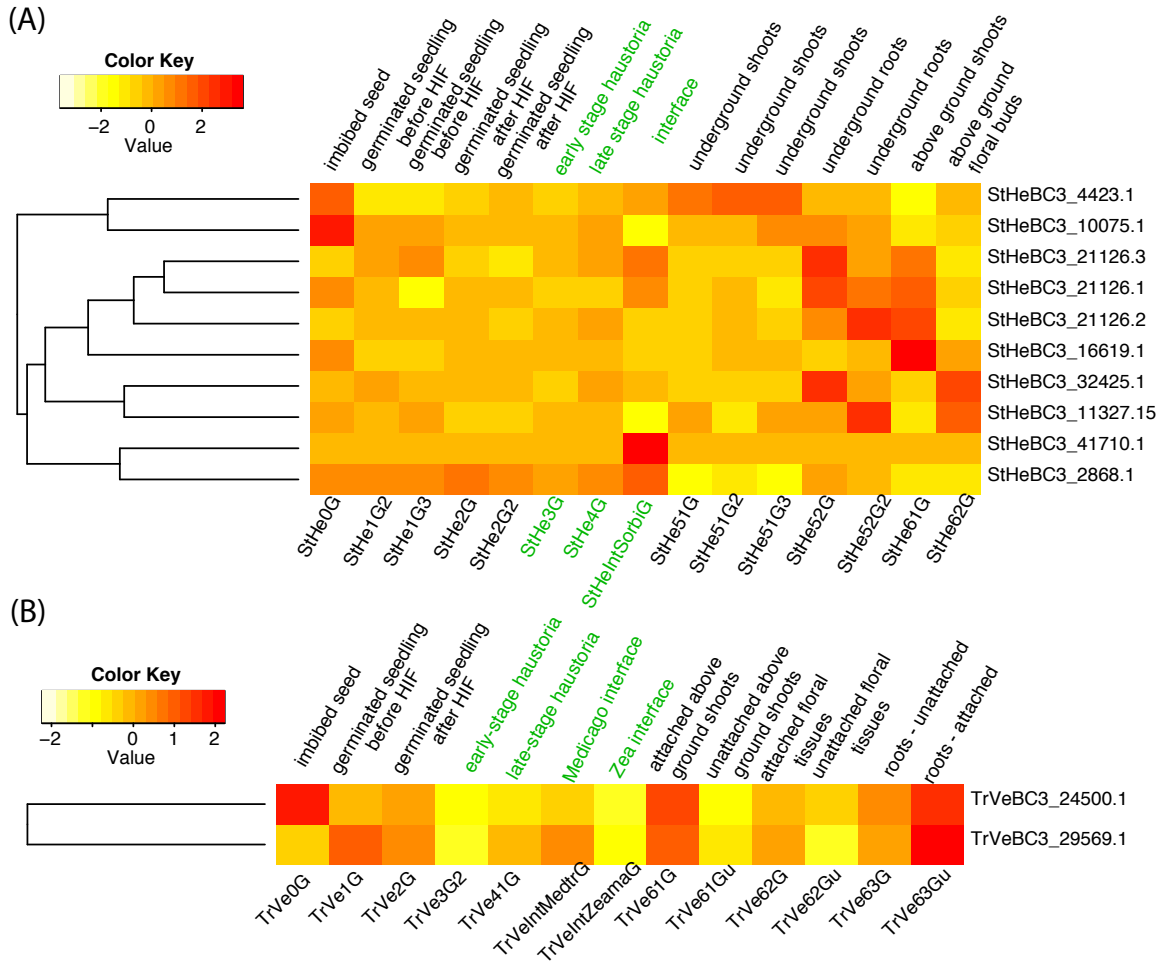

**Figure S9.** Heatmaps of HGT transgenes in *Striga hermonthica* (A), and *Triphysaria versicolor* (B). These genes were identified from the 42 HGT orthogroups. Heatmap intensity represents the FPKM-transformed z-score.

**Table S1.** Scoring scheme used to score each phylogenetic tree based on bootstrap support, depth of donor clades, and long branches.

| Criterion1        |       | Criterion2                                          |       | Criterion3                             |       | Scoring      |            |
|-------------------|-------|-----------------------------------------------------|-------|----------------------------------------|-------|--------------|------------|
| Bootstrap support | score | Sampling depth                                      | score | Branch length                          | score | Summed score | confidence |
| x=100             | 10    | rich sampling in the donor clade and strong support | 5     | branch length not long                 | 3     | x≤9          | low        |
| 90≤x<100          | 8     |                                                     |       |                                        |       |              |            |
| 80≤x<90           | 6     |                                                     |       |                                        |       |              |            |
| 70≤x<80           | 4     | rich sampling in the donor clade and low support    | 3     | branch length < 2 times of the average | 2     | 10≤x≤14      | medium     |
| 60≤x<70           | 3     |                                                     |       |                                        |       |              |            |
| 50≤x<60           | 2     | mixed samples in the ancestral node                 | 1     | branch length ≥=2 times                | 1     | 15≤x≤18      | high       |
| x<50              | 1     |                                                     |       |                                        |       |              |            |

**Table S2.** SH test to evaluate number of transfers in HGT trees by constraining multiple HGT genes to one monophyletic clade.

| orthogroup | logL (original) | logL (constrained) | Significant worse (0.01)? | # of transfers |
|------------|-----------------|--------------------|---------------------------|----------------|
| 218        | -106049.78      | -106490.58         | Y                         | ≥ 2            |



|       |            |            |   |     |
|-------|------------|------------|---|-----|
| 1021  | -40178.73  | -40281.56  | Y | ≥ 2 |
| 3861  | -42295.88  | -42296.95  | N | 1   |
| 5002  | -95429.05  | -95694.82  | Y | ≥ 2 |
| 8888  | -35555.79  | -35813.86  | Y | ≥ 2 |
| 11437 | -121967.75 | -122293.12 | Y | ≥ 2 |
| 13512 | 113878.47  | -114045.44 | Y | ≥ 2 |
| 14233 | -88970.83  | -89052.98  | Y | ≥ 2 |
| 18354 | -11889.45  | -11941.91  | Y | ≥ 2 |
| 18774 | -48200.19  | -48661.65  | Y | ≥ 2 |
| 19297 | -48200.19  | -48661.65  | Y | ≥ 2 |

logL: log likelihood value, Y means the constrained tree is significant worse than the original tree, N means the constrained tree is not significant worse than the original tree.

**Table S3.** Verification of HGT sequences by multiple lines of evidences including RT-PCR (RT), genomic PCR (GP), covered by genomic sequencing (GS), present in transcriptomes of multiple parasitic species (MP), or by existing studies.

| Orthogroup (genes)                        | Verification                               | Orthogroup                            | Verification |
|-------------------------------------------|--------------------------------------------|---------------------------------------|--------------|
| 1886 (PhAeBC5_15496.1)                    | RT, GP, GS                                 | 12835 (StHeBC3_10075.1)               | GS           |
| 14624 (StHeGnB1_80049)                    | GP, GS                                     | 14230 (PhAeBC5_34854.1)               | GS           |
| 1685 (PhAeBC5_6791.2/9731.1/15355.1)      | RT, GP                                     | 17 (PhAeBC5_8480.1)                   | GS           |
| 10143 (PhAeBC5_14056.1)                   | RT                                         | 226 (PhAeBC5_14888.1)                 | GS           |
| 8888 (2) (PhAeBC5_15086.1)                | RT                                         | 9613 (PhAeBC5_16890.17)               | GS           |
| 10050 (PhAeBC5_4284.2)                    | RT, GP (I)                                 | 19696 (PhAeBC5_17034.1)               | GS           |
| 13656 (StHeBC3_41710.1)                   | RT                                         | 16703 (StHeBC3_11327.15)              | GS           |
| 14233 (2) (StHeBC3_16619.1)               | RT                                         | 18709 (PhAeBC5_654.1)                 | GS           |
| 18774 (2) (StHeBC3_4423.1)                | RT                                         | 13892 (PhAeBC5_4266.1)                | GS           |
| 20190 (PhAeBC5_2529.1)                    | RT                                         | 1021 (2)<br>(PhAeBC5_17559.1)         | GS           |
| 2376 (PhAeBC5_270.1<br>StHeBC3_48088.1)   | RT, GS                                     | 5002 (2)<br>(PhAeBC5_9781.2)          | GS           |
| 11841 (PhAeBC5_3756.1<br>StHeBC3_55745.1) | RT, GS, GP<br>(I-<br>Pa_3756.1)            | 15149 (PhAeBC5_8832.4)                | GS           |
| 1226 (PhAeBC5_11914.4)                    | RT, GS                                     | 20188 (PhAeBC5_1574.1)                | GS           |
| 3861 (PhAeBC5_9914.1 /22555.2)            | RT, GS, GP<br>(I)                          | 4572 (PhAeBC5_8623.1)                 | MP (3)       |
| 5896 (StHeBC3_21126.1)                    | RT, GS                                     | 4598 (PhAeBC5_13756.1)                | MP(3)        |
| 806 (PhAeBC5_4239.1)                      | RT, GS, GP<br>(I)                          | 11437 (2)<br>(PhAeBC5_13226.1/6799.1) | MP (4)       |
| 2270 (StHeBC3_2868.1)                     | RT, GS                                     | 13512 (2)<br>(PhAeBC5_1584.1/3740.1)  | MP (4)       |
| 4067 (PhAeBC5_9762.1)                     | RT, GS                                     | 14675 (PhAeBC5_12620.5)               | MP (4)       |
| 218 (2) (PhAeBC5_20413.1)                 | RT, GS                                     | 18354 (2)<br>(PhAeBC5_5786.1)         | MP (4)       |
| 19297 (2) (StGe3_4270)                    | Reference –<br>Yoshida et<br>al. 2010 (26) | 23343 (PhAeBC5_4800.1)                | MP(4)        |
| 15246 (PhAeBC5_2525.1)                    | Reference –<br>Zhang et al.<br>2013 (28)   | 23480 (PhAeBC5_5395.1)                | MP (2)       |

Number in the parenthesis following orthogroup and transcriptome stands for the number of events for that orthogroup, and the number of parasite transcriptomes containing the HGT gene, respectively. “I” followed by GP (genomic PCR) represents introns in the sequenced genomic PCR product.

**Table S4.** An example of orthogroup 806 showing conserved intron positions in coding sequence (CDS) multiple sequence alignment (MSA).

| Sequence id                                     | pos  | pos  | pos  | pos  | pos  | pos  | pos  | pos  |      |
|-------------------------------------------------|-----|-----|-----|-----|-----|-----|-----|-----|------|------|------|------|------|------|------|------|------|
| gnl_Ambtr1.0.27_AmTr_v1.0_scaffold00038.43      | 333 | 515 | 591 | 657 | 741 | 819 | 903 | 983 | 1347 | 1587 | 1796 | 2202 | 2457 | 2967 | 3074 | 3177 | 3335 |
| gnl_Sorbi1.4_PACid_1975126                      | 333 | 515 | 591 | 657 | 741 | 819 | 903 | 983 | 1347 | 1587 | 1796 | 2202 | 2457 | 2967 | 3074 | 3177 | 3335 |
| gnl_Orysa6.0_PACid_16846845                     | 333 | 515 | 591 | 657 | 741 | 819 | 903 | 983 | 1347 | 1587 | 1796 | 2510 |      |      |      |      |      |
| gnl_Orysa6.0_PACid_16844493                     | 333 | 515 | 591 | 657 | 741 | 819 | 903 | 983 | 1347 | 1587 | 1796 | 2202 | 2457 | 2967 | 3074 | 3177 |      |
| gnl_Orysa6.0_PACid_16844494                     | 333 | 515 | 591 | 657 | 741 | 819 | 903 | 983 | 1347 | 1587 | 1796 | 2202 | 2457 | 2967 | 3074 | 3177 |      |
| gnl_Orysa6.0_PACid_16849430                     | 333 | 515 | 591 | 657 | 741 | 819 | 903 | 983 | 1347 | 1587 | 1796 | 2202 | 2457 | 2967 | 3074 | 3177 | 3335 |
| gnl_Orysa6.0_PACid_16849429                     | 333 | 515 | 591 | 657 | 741 | 819 | 903 | 983 | 1347 | 1587 | 1796 | 2202 | 2457 | 2967 | 3074 | 3177 | 3335 |
| gnl_Bradi1.2_Bradi2g04960.1                     | 333 | 515 | 591 | 657 | 741 | 819 | 903 | 983 | 1347 | 1587 | 1796 | 2202 | 2457 | 2967 | 3074 | 3177 | 3335 |
| gnl_Bradi1.2_Bradi3g30350.1                     | 333 | 504 |     | 657 | 741 | 819 | 903 | 987 | 1347 | 1587 | 1796 | 2457 | 2967 | 3074 | 3177 | 3335 |      |
| gnl_Orysa6.0_PACid_16886435                     | 333 | 515 | 591 | 657 | 741 | 819 | 903 | 983 | 1347 | 1545 | 1796 | 2202 | 2457 | 2967 | 3074 | 3177 | 3335 |
| gnl_Aquco1.0_PACid_18164810                     | 333 | 515 | 591 | 657 | 741 | 819 | 903 | 983 | 1347 | 1587 | 1796 | 2202 | 2457 | 2967 | 3074 | 3177 | 3335 |
| gnl_Aquco1.0_PACid_18157961                     | 333 | 515 | 591 | 657 | 741 | 819 | 903 | 983 | 1347 | 1587 | 1796 | 2202 | 2457 | 2967 | 3074 | 3177 | 3335 |
| gnl_Aquco1.0_PACid_18144325                     | 333 | 515 | 591 | 657 | 741 | 819 | 903 | 983 | 1347 | 1587 | 1796 | 2202 | 2457 | 2967 | 3074 | 3177 | 3335 |
| gnl_Poptr2.2_PACid_18207203                     |     |     |     |     | 741 | 819 | 903 | 983 | 1347 | 1587 | 1796 | 2202 | 2457 | 2967 | 3074 | 3177 | 3335 |
| gnl_Poptr2.2_PACid_18244025                     |     | 515 | 591 | 657 | 741 | 819 | 903 | 983 | 1347 | 1587 | 1796 | 2202 | 2457 | 2967 | 3074 | 3177 | 3335 |
| gnl_Arath10_AT1G14610.1                         | 333 | 515 | 591 | 657 | 741 | 819 | 903 | 983 | 1347 | 1587 | 1796 | 2202 | 2457 | 2967 | 3074 | 3177 | 3335 |
| gnl_Thepa2.0_Tp1g12970                          | 333 | 515 | 591 | 657 | 741 | 819 | 903 | 983 | 1347 | 1587 | 1796 | 2202 | 2457 | 2967 | 3074 | 3177 |      |
| gnl_Theca1.0_Tc09_g018620 (HGT donor)           | 333 | 515 | 591 | 657 | 741 | 819 | 903 | 983 | 1347 | 1587 | 1796 | 2202 | 2457 | 2967 | 3074 | 3177 | 3335 |
| PhAeBC5_4239.1 (HGT gene)                       | 333 | 515 | 591 | 657 | 741 | 819 | 903 | 983 | 1347 | 1587 | 1796 | 2202 | 2457 | 2967 | 3074 | 3177 | 3335 |
| gnl_Medtr3.5_Medtr1g101620.1                    |     | 515 | 591 | 657 | 741 | 819 | 903 | 983 | 1347 | 1587 | 1796 | 2202 | 2457 | 2967 | 3074 | 3177 | 3335 |
| gnl_Glyma1.01_PACid_16281403                    |     | 515 | 591 | 657 | 741 | 819 | 903 | 983 | 1347 | 1587 | 1796 | 2202 | 2457 | 2967 | 3074 | 3177 | 3335 |
| gnl_Glyma1.01_PACid_16281404                    |     | 515 | 591 | 657 | 741 | 819 | 903 | 983 | 1347 | 1587 | 1796 | 2202 | 2457 | 2967 | 3074 | 3177 | 3335 |
| gnl_Vitvi12X_PACid_17822742                     | 333 | 515 | 591 | 657 | 741 | 819 | 903 | 983 | 1347 | 1587 | 1796 | 2202 | 2457 | 2967 | 3074 | 3177 | 3335 |
| gnl_Solly2.3_Solyc09g007540.2.1                 | 333 | 515 | 591 | 657 | 741 | 819 | 903 | 983 | 1347 | 1587 | 1796 | 2202 | 2457 | 2967 | 3074 | 3177 | 3335 |
| gnl_Mimgu1.0_PACid_17678221 (Vertical relative) | 333 | 515 | 591 | 657 | 741 | 819 | 903 | 983 | 1347 | 1587 | 1796 | 2202 | 2457 | 2967 | 3074 | 3177 |      |
| gnl_Mimgu1.0_PACid_17684099 (Vertical relative) | 333 | 515 | 591 | 657 | 741 | 819 | 903 | 983 | 1347 | 1587 | 1796 | 2202 | 2457 | 2967 | 3074 | 3177 | 3335 |
| gnl_Mimgu1.0_PACid_17693905 (Vertical relative) | 333 | 515 | 591 | 657 | 741 | 819 | 903 | 983 | 1347 | 1587 | 1796 | 2202 | 2457 | 2967 | 3074 | 3177 |      |
| PhAeBC5_4810.1 (vertical gene)                  | 333 | 515 | 591 | -   | 741 | 819 | -   | 983 | 1347 | 1587 | 1796 | 2202 | 2457 | 2967 | 3074 | 3177 | 3335 |

pos: intron position in MSA; "-" means not available due to low coverage of genomic DNA sequencing data.

**Table S5.** Summary of conserved intron positions (CIPs) in HGT clade and the overall MSA.

| orthogroup | annotation                       | HGT recipient genus | Donor representative | # of CIPs in HGT clade | scorable # of CIPs in HGT clade | # of CIPs in MSA |
|------------|----------------------------------|---------------------|----------------------|------------------------|---------------------------------|------------------|
| 2376       | proteasome subunit               | P, S                | Poptr                | 8                      | 8                               | 10               |
| 11841      | Oxidoreductase, 2OG-Fe oxygenase | P, S, O             | Frave                | 1                      | 3                               | 3                |
| 4067       | tRNAHis                          | P                   | Frave                | 8                      | 9                               | 12               |

|       |                                                               |         |              |    |    |     |  |
|-------|---------------------------------------------------------------|---------|--------------|----|----|-----|--|
|       | guanylyltransferase                                           |         |              |    |    |     |  |
| 8888  | tRNA<br>adenylyltransferase<br>activity                       | P       | Frave        | 7  | 7  | 14  |  |
| 10050 | tRNA synthetase class<br>II core domain<br>containing protein | P       | Frave        | 4  | 4  | 6   |  |
| 806   | Valyl-tRNA<br>synthetase                                      | P, O    | Theca        | 15 | 15 | 19  |  |
| 2270  | methionyl-tRNA<br>synthetase                                  | P, S, O | Theca        | 11 | 13 | 16  |  |
| 1685  | Gnk2-homologous<br>domain                                     | P       | Medtr, Glyma | 7  | 7  | 7   |  |
| 1886  | Ankyrin repeat family<br>protein                              | P       | Frave        | 0  | 2  | 2   |  |
| 9613  | HAD-superfamily<br>hydrolase                                  | P       | Glyma        | 2  | 3  | 12  |  |
| 3861  | Poly (ADP-ribose)<br>glycohydrolase<br>(PARG)                 | P, L    | Glyma        | 7  | 7  | 9   |  |
| 5896  | uroporphyrinogen-III<br>synthase                              | S       | Glyma        | 8  | 8  | 8   |  |
| 18774 | Domain of unknown<br>function                                 | S       | Orysa        | 0  | 0  | 0   |  |
| Total |                                                               |         |              | 78 | 79 | 118 |  |

HGT recipient genus: P – *Phelipanche*, S – *Striga*, O – *Orobanche*, L – *Lindenbergia*. Nomenclature of the donor follows the five-letter rule (The first three letters of the genus, and first two letters of the species).

**Table S6.** PAML analyses with branch test on codon alignment of 42 HGT orthogroups, testing mode of selection in HGT sequences (foreground) compared to VGT sequences (background).

| Ortho ID | D <sub>n</sub> | D <sub>s</sub> | Foreground ω | Background ω | P-value   | Significant at 0.05 | Selection |
|----------|----------------|----------------|--------------|--------------|-----------|---------------------|-----------|
| 806      | 0.09           | 0.33           | 0.27         | 0.14         | < 0.00001 | S                   | RP        |
| 1886     | 0.48           | 0.82           | 0.58         | 0.16         | < 0.00001 | S                   | RP        |
| 2270     | 0.09           | 0.28           | 0.31         | 0.14         | < 0.00001 | S                   | RP        |
| 2376     | 0.03           | 0.15           | 0.18         | 0.04         | 0.000108  | S                   | RP        |
| 4067     | 0.10           | 0.24           | 0.43         | 0.20         | 0.000187  | S                   | RP        |
| 8888     | 0.12           | 0.28           | 0.43         | 0.23         | 0.001553  | S                   | RP        |
| 9613     | 0.51           | 1.03           | 0.50         | 0.14         | < 0.00001 | S                   | RP        |
| 10050    | 0.13           | 0.26           | 0.51         | 0.20         | < 0.00001 | S                   | RP        |
| 10143    | 0.10           | 0.21           | 0.46         | 0.20         | < 0.00001 | S                   | RP        |
| 1226     | 0.22           | 0.41           | 0.55         | 0.27         | 0.002847  | S                   | RP        |
| 4598     | 0.22           | 0.56           | 0.39         | 0.27         | 0.016327  | S                   | RP        |
| 11437    | 0.40           | 0.53           | 0.74         | 0.36         | < 0.00001 | S                   | RP        |
| 13512    | 0.29           | 0.17           | 1.65         | 0.34         | < 0.00001 | S                   | POS       |
| 3861     | 0.14           | 0.10           | 1.48         | 0.28         | < 0.00001 | S                   | POS       |
| 18709    | 0.19           | 0.17           | 1.16         | 0.22         | 0.000495  | S                   | POS       |
| 19696    | 0.56           | 73.08          | 0.01         | 0.29         | 0.022212  | S                   | SP        |
| 11841    | 0.03           | 0.20           | 0.14         | 0.26         | 0.03422   | S                   | SP        |
| 13656    | 0.01           | 3.08           | 0.00         | 0.30         | < 0.00001 | S                   | SP        |
| 14233    | 0.32           | 1.16           | 0.27         | 0.48         | 0.005556  | S                   | SP        |
| 5896     | 0.06           | 0.21           | 0.29         | 0.30         | 0.943628  | NS                  | P         |
| 1685     | 0.06           | 0.21           | 0.29         | 0.27         | 0.811464  | NS                  | P         |
| 17       | 0.21           | 0.78           | 0.27         | 0.23         | 0.054126  | NS                  | P         |
| 218      | 0.07           | 0.54           | 0.12         | 0.20         | 0.431345  | NS                  | P         |
| 226      | 0.12           | 0.51           | 0.24         | 0.27         | 0.449545  | NS                  | P         |
| 1021     | 0.13           | 0.72           | 0.18         | 0.19         | 0.943886  | NS                  | P         |
| 4572     | 0.13           | 0.42           | 0.31         | 0.47         | 0.054707  | NS                  | P         |
| 5002     | 0.17           | 1.00           | 0.17         | 0.23         | 0.172164  | NS                  | P         |
| 12835    | 0.11           | 0.68           | 0.16         | 0.18         | 0.731762  | NS                  | P         |
| 13892    | 0.02           | 0.09           | 0.26         | 0.24         | 0.917998  | NS                  | P         |
| 14230    | 0.28           | 2.22           | 0.13         | 0.16         | 0.331354  | NS                  | P         |
| 14624    | 0.22           | 1.02           | 0.22         | 0.26         | 0.420936  | NS                  | P         |
| 14675    | 0.49           | 1.22           | 0.40         | 0.47         | 0.705675  | NS                  | P         |
| 15149    | 0.31           | 1.24           | 0.25         | 0.28         | 0.734189  | NS                  | P         |
| 15246    | 0.06           | 0.10           | 0.65         | 0.24         | 0.139996  | NS                  | P         |
| 16703    | 0.40           | 70.39          | 0.01         | 0.33         | 0.09305   | NS                  | P         |
| 18354    | 0.54           | 1.01           | 0.54         | 0.62         | 0.908563  | NS                  | P         |

|       |      |      |      |      |          |    |   |
|-------|------|------|------|------|----------|----|---|
| 18774 | 0.20 | 0.32 | 0.61 | 0.51 | 0.26167  | NS | P |
| 19297 | 0.08 | 0.14 | 0.61 | 0.51 | 0.26167  | NS | P |
| 20188 | 0.55 | 0.66 | 0.83 | 0.82 | 0.971238 | NS | P |
| 20190 | 0.19 | 0.22 | 0.88 | 0.91 | 0.946516 | NS | P |
| 23343 | 0.08 | 0.32 | 0.26 | 0.34 | 0.05642  | NS | P |
| 23480 | 0.22 | 0.26 | 0.56 | 0.84 | 0.218423 | NS | P |

Significant branch tests (at  $p < 0.05$ ) reveal relaxed constraint (RP), positive selection (POS), or stronger purifying selection (SP) in the HGT foreground compared to background. Non-significant branch tests show a common level of purifying selection (P) in the foreground HGT sequences compared to the VGT background.

**Table S7.** PAML analyses with the branch-site model on codon alignment of 15 HGT orthogroups with greater  $D_n/D_s$  on HGT genes compared to the background, identifying the presence of sites under positive selection.

| HGT transgene IDs                                                                                                                                     | Orthogroup ID    | Sites identified having positive selection ( $P < 0.05$ )                                                                                                                                                                                                                                                                  |
|-------------------------------------------------------------------------------------------------------------------------------------------------------|------------------|----------------------------------------------------------------------------------------------------------------------------------------------------------------------------------------------------------------------------------------------------------------------------------------------------------------------------|
| PhAeBC5_4239.1 OrMi2_4015<br>PhRa5_26371 PhMu2_16115                                                                                                  | 806*             | 556 D;                                                                                                                                                                                                                                                                                                                     |
| PhAeBC5_11914.4 PhRa5_49596<br>PhRa5_27280 PhMu2_10869<br>PhMu2_12766                                                                                 | 1226*            | 135 E; 250 V;                                                                                                                                                                                                                                                                                                              |
| PhAeBC5_15496.1 PhRa5_103413<br>PhRa5_58721                                                                                                           | 1886*            | 1 M; 39 E; 83 F; 84 S; 86 E; 92 K; 146 L; 153 S; 170 T; 173 D; 176 C; 210 T; 214 L; 230 T; 236 T; 247 R; 249 Q; 251 C; 254 D; 256 V; 317 G; 318 K; 322 E; 330 P; 347 S; 363 A; 403 G; 404 F; 406 S; 416 C; 421 G; 426 F; 428 G; 429 P; 438 C; 444 W; 472 A; 485 A; 488 V; 493 A; 500 G; 530 S; 533 E; 535 V; 581 D; 582 L; |
| StHeBC3_2868.1 PhAeBC5_3356.1<br>PhRa5_6157 PhMu2_12619<br>PhMu2_44156 PhMu2_20937<br>PhMu2_5516 PhMu2_14031<br>OrMi2_4206 StGe3_7730 StGe3_20099     | 2270             | NA                                                                                                                                                                                                                                                                                                                         |
| PhAeBC5_270.3 StHeBC3_48088.1<br>PhRa5_4383 PhMu2_6326 PhRa5_4382                                                                                     | 2376*            | 20 V;                                                                                                                                                                                                                                                                                                                      |
| PhAeBC5_9914.1 OrMi2_2808<br>PhRa5_12205 PhMu2_12820<br>PhMu2_11052                                                                                   | 3861*            | 23 S; 45 E; 68 A; 71 D; 93 L; 96 D; 97 D; 254 D; 289 K; 301 V; 486 C; 543 W; 568 P;                                                                                                                                                                                                                                        |
| PhAeBC5_9762.1 PhRa5_10084<br>PhMu2_15393                                                                                                             | 4067*            | 218 K;                                                                                                                                                                                                                                                                                                                     |
| PhAeBC5_13756.1 PhMu2_15647<br>PhRa5_33568                                                                                                            | 4598             | 31 R; 32 P; 156 S; 159 G; 160 L; 169 K; 187 L; 188 S; 233 Q; 235 K; 240 K; 244 T; 247 E; 248 A; 249 M; 251 L; 253 P; 282 L; 284 S; 379 K; 481 N; 495 E; 500 G; 535 A; 536 T; 539 V; 540 A; 543 C; 545 P; 547 N;                                                                                                            |
| Phelipanche_ramosa_PhRa5_6603<br>Phelipanche_mutelii_PhMu2_37370<br>Phelipanche_ramosa_PhRa5_6605<br>PhAeBC5_15086.1<br>Phelipanche_ramosa_PhRa5_6604 | 8888*            | 209 Q; 538 D; 559 P;                                                                                                                                                                                                                                                                                                       |
| PhAeBC5_16890.17 PhRa5_14643<br>PhRa5_14643                                                                                                           | 9613*            | 3 P; 4 S; 22 S; 26 R; 33 F; 42 K; 50 K; 53 T; 55 N; 73 L; 74 P; 77 D; 78 A; 81 I; 82 G; 85 L; 86 Q; 87 I; 90 E; 95 V; 96 E; 99 F; 100 V; 101 H; 102 L; 104 F; 106 C; 107 E; 109 K; 110 P; 112 H; 114 V; 116 S; 121 S; 122 K; 123 P; 126 K; 127 F; 162 T;                                                                   |
| PhAeBC5_4284.2 PhMu2_5340<br>PhRa5_11783 PhMu2_31112                                                                                                  | 10050*           | 472 S; 666 S; 709 G; 710 S; 763 F;                                                                                                                                                                                                                                                                                         |
| PhAeBC5_14056.1 OrMi2_39134<br>OrMi2_14052                                                                                                            | 10143*           | 521 H; 599 G;                                                                                                                                                                                                                                                                                                              |
| PhAeBC5_1584.1 PhAeBC5_3740.1<br>PhAeBC5_1584.1 OrCa3_3600<br>PhRa5_1522 PhMu2_40952                                                                  | 11437*<br>13512* | 1201 Y; 1242 E; 1287 T; 1417 A; 1637 G; 367 R; 479 C; 480 R; 497 S; 520 S; 533 F; 536 E; 547 L; 768 G; 831 N; 844 N; 886 E; 1005 P; 1107 Y; 1129 L; 1174 K; 1391 S;                                                                                                                                                        |

NA indicates no adaptive sites were identified. "\*" after each orthogroup indicates presence of adaptive sites were identified only in parasitic lineages, not in a nonparasitic genome, such as *Mimulus*.

**Table S8.** RELAX analyses on codon alignment of 42 HGT orthogroups testing stronger selection or relaxed constraint in HGT sequences compared to the background.

| Ortho ID | K     | P-value | Significant at 0.05 | Selection: HGT vs background |
|----------|-------|---------|---------------------|------------------------------|
| 806      | 1.01  | 0.838   | NS                  | same                         |
| 9613     | 0.75  | 0.090   | NS                  | same                         |
| 14230    | 0.66  | 0.064   | NS                  | same                         |
| 10050    | 1.01  | 0.970   | NS                  | same                         |
| 11841    | 1.35  | 0.237   | NS                  | same                         |
| 19696    | 0.65  | 0.193   | NS                  | same                         |
| 18709    | 0.85  | 0.987   | NS                  | same                         |
| 11437    | 1.03  | 0.747   | NS                  | same                         |
| 13656    | 0.78  | 0.584   | NS                  | same                         |
| 17       | 1.03  | 0.720   | NS                  | same                         |
| 1021     | 1.14  | 0.325   | NS                  | same                         |
| 5002     | 1.05  | 0.538   | NS                  | same                         |
| 12835    | 1.78  | 0.103   | NS                  | same                         |
| 14624    | 1.02  | 0.914   | NS                  | same                         |
| 15246    | 1     | 0.995   | NS                  | same                         |
| 16703    | 1.02  | 0.914   | NS                  | same                         |
| 18354    | 1     | 0.970   | NS                  | same                         |
| 18774    | 0.92  | 0.436   | NS                  | same                         |
| 20188    | 0     | 0.067   | NS                  | same                         |
| 20190    | 0.73  | 0.294   | NS                  | same                         |
| 23343    | 1.21  | 0.227   | NS                  | same                         |
| 23480    | 1.02  | 0.960   | NS                  | same                         |
| 4572     | 50    | 0.004   | S                   | stronger                     |
| 5896     | 50    | 0.026   | S                   | stronger                     |
| 19297    | 49.44 | 0.013   | S                   | stronger                     |
| 1886     | 49.42 | 0.001   | S                   | stronger                     |
| 4598     | 35.1  | 0.000   | S                   | stronger                     |
| 226      | 2.22  | 0.000   | S                   | stronger                     |
| 14233    | 2.16  | 0.000   | S                   | stronger                     |
| 4067     | 1.99  | 0.000   | S                   | stronger                     |
| 218      | 1.93  | 0.000   | S                   | stronger                     |
| 13512    | 1.9   | 0.000   | S                   | stronger                     |
| 1226     | 1.61  | 0.000   | S                   | stronger                     |
| 14675    | 1.14  | 0.004   | S                   | stronger                     |
| 1685     | 0.82  | 0.004   | S                   | relaxed                      |
| 2270     | 0.68  | 0.000   | S                   | relaxed                      |
| 15149    | 0.66  | 0.038   | S                   | relaxed                      |
| 8888     | 0.61  | 0.013   | S                   | relaxed                      |
| 3861     | 0.55  | 0.000   | S                   | relaxed                      |
| 13892    | 0.54  | 0.030   | S                   | relaxed                      |
| 2376     | 0.21  | 0.000   | S                   | relaxed                      |
| 10143    | 0.08  | 0.001   | S                   | relaxed                      |

Significant RELAX results (at  $p < 0.05$ ) reveal stronger selection (stronger), relaxed constraint (relaxed). Non-significant RELAX results show the same level of selection in the foreground HGT sequences compared to background (same).

**Table S9.** Inferred donor lineage and recipient taxa from the gene trees for the final 42 HGT orthogroups.

| orthogroup ID | recipient taxa     | donor family  | taxa or common name                                |
|---------------|--------------------|---------------|----------------------------------------------------|
| 17            | Phe                | Amaranthaceae | <i>Beta vulgaris</i> (beet)                        |
| 218           | Tri, Ale, Phe, Str | Rosaceae      | <i>Prunus</i> (peach)                              |
| 226           | Phe                | Euphorbiaceae | <i>Morchella</i> (Cassava)                         |
| 806           | Phe, Oro           | Malvaceae     | <i>Theobroma cacao</i> (cocoa)                     |
| 1021          | Phe, Tri           | Rosaceae      | <i>Fragaria</i> (strawberry), <i>Malus</i> (apple) |
| 1226          | Phe                | Euphorbiaceae | <i>Ricinus communis</i> (castor bean)              |
| 1685          | Phe                | Fabaceae      | <i>Medicago</i> , <i>Glycine</i>                   |
| 1886          | Phe                | Rosaceae      | <i>Fragaria vesca</i> (strawberry)                 |
| 2270          | Phe, Oro, Str      | Malvaceae     | <i>Theobroma cacao</i> (cocoa)                     |
| 2376          | Phe, Str           | Rosaceae      | <i>Fragaria vesca</i> (strawberry)                 |

|       |                    |                       |                                                        |
|-------|--------------------|-----------------------|--------------------------------------------------------|
| 3861  | LiPh, Phe, Oro     | Fabaceae              | <i>Glycine</i> (soybean)                               |
| 4067  | Phe                | Rosaceae              | <i>Fragaria vesca</i> (strawberry)                     |
| 4572  | Phe, Oro           | Rosaceae              | <i>Fragaria vesca</i> (strawberry)                     |
| 4598  | Phe                | Fabaceae              | <i>Medicago</i> (alfalfa, barrel millet)               |
| 5002  | Phe, Oro, Ale      | Fabaceae              | <i>Fragaria</i> (strawberry), <i>Prunus</i> (peach)    |
| 5896  | Str                | Fabaceae              | <i>Glycine</i> (soybean)                               |
| 8888  | Phe, Oro           | Rosaceae,<br>Fabaceae | <i>Fragaria</i> (strawberry), <i>Glycine</i> (soybean) |
| 9613  | Phe                | Fabaceae              | <i>Medicago</i> (alfalfa, barrel millet)               |
| 10050 | Phe                | Rosaceae              | <i>Fragaria vesca</i> (strawberry)                     |
| 10143 | Phe, Oro           | Rosaceae              | <i>Fragaria vesca</i> (strawberry)                     |
| 11437 | Phe                | Rosaceae              | <i>Fragaria vesca</i> (strawberry)                     |
| 11841 | Phe, Oro           | Rosaceae              | <i>Fragaria vesca</i> (strawberry)                     |
| 12835 | Str                | Poaceae               | <i>Sorghum bicolor</i>                                 |
| 13512 | Phe, Oro           | Rosaceae              | <i>Fragaria vesca</i> (strawberry)                     |
| 13656 | Str                | Poaceae               | <i>Sorghum bicolor</i>                                 |
| 13892 | Phe, Oro           | Fabaceae              | <i>Medicago</i> (alfalfa, barrel millet)               |
| 14230 | Phe                | Rosaceae              | <i>Prunus</i> (peach)                                  |
| 14233 | Str                | Poaceae               | <i>Oryza sativa</i> (rice)                             |
| 14624 | Str                | Poaceae               | <i>Sorghum bicolor</i> , maize                         |
| 14675 | Phe, Oro           | Rosaceae              | <i>Fragaria vesca</i> (strawberry)                     |
| 15149 | Phe, Oro           | Rosaceae              | <i>Fragaria vesca</i> (strawberry)                     |
| 15246 | Phe, Oro, Ale, Tri | Fabaceae              | <i>Medicago</i> (alfalfa, barrel millet)               |
| 16703 | Str                | Poaceae               | <i>Sorghum bicolor</i>                                 |
| 18354 | Phe, Oro           | Rosaceae              | <i>Fragaria vesca</i> (strawberry)                     |
| 18709 | Phe                | Brassicaceae          | <i>Arabidopsis thaliana</i> (thale cress)              |
| 18774 | Str                | Poaceae               | <i>Setaria italica</i> (foxtail millet)                |
| 19297 | Str                | Poaceae               | <i>Sorghum bicolor</i>                                 |
| 19696 | Phe                | Salicaceae            | <i>Populus trichocarpa</i> (poplar)                    |
| 20188 | Phe, Str           | Rosaceae              | <i>Fragaria vesca</i> (strawberry)                     |
| 20190 | Phe                | Rosaceae              | <i>Fragaria vesca</i> (strawberry)                     |
| 23343 | Phe, Oro           | Euphorbiaceae         | <i>Ricinus communis</i> (castor bean)                  |
| 23480 | Phe                | Rosaceae              | <i>Fragaria vesca</i> (strawberry)                     |

Phe: *Phelipanche*, Oro: *Orobancha*, Str: *Striga*, Tri: *Triphysaria*, Ale: *Alectra*, Lin: *Lindebergia*

**Table S10.** Inferred Pfam domains for the HGT genes in the 42 orthogroups.

| orthogroup | HGT unigene     | Pfam domain                                                                                                                                      |
|------------|-----------------|--------------------------------------------------------------------------------------------------------------------------------------------------|
| 226        | PhAeBC5_14888.1 | [Cytochrome P450(31-483)]                                                                                                                        |
|            | PhAeBC5_15353.2 | [Bacteriophage coat protein B(47-66), ABC1 family(109-154), Beta-amyloid peptide (beta-APP)(154-162), Phosphotransferase enzyme family(215-253)] |
|            | PhAeBC5_9731.1  | [Salt stress response/antifungal(62-151), Protein of unknown function (DUF2970)(177-195), ABC1 family(238-281)]                                  |
| 1685       | PhAeBC5_6791.2  | [Salt stress response/antifungal(148-244), ABC1 family(327-376)]                                                                                 |
| 2376       | PhAeBC5_270.3   | [Proteasome subunit A N-terminal signature(142-147)]                                                                                             |
| 14624      | StHeGnB1_80049  | [BTB/POZ domain(272-300)]                                                                                                                        |
| 23343      | PhAeBC5_4800.1  | [NB-ARC domain(174-451), CENP-Q, a CENPA-CAD centromere                                                                                          |

|       |                                                                          |                                                                                                                                                                                                                                                                                                                                                                                                                              |
|-------|--------------------------------------------------------------------------|------------------------------------------------------------------------------------------------------------------------------------------------------------------------------------------------------------------------------------------------------------------------------------------------------------------------------------------------------------------------------------------------------------------------------|
|       |                                                                          | complex subunit(703-758), AAA ATPase domain(761-805), Leucine rich repeat(862-872)]                                                                                                                                                                                                                                                                                                                                          |
| 11841 | PhAeBC5_3756.1                                                           | [non-haem dioxygenase in morphine synthesis N-terminal(39-150), 2OG-Fe(II) oxygenase superfamily(200-294)]                                                                                                                                                                                                                                                                                                                   |
| 1886  | PhAeBC5_15496.1                                                          | [PUL domain(281-350)]                                                                                                                                                                                                                                                                                                                                                                                                        |
| 11437 | PhAeBC5_13226.1<br>PhAeBC5_6799.1                                        | [Kelch motif(207-212), Kelch motif(228-244)] [Kelch motif(155-190), Kelch motif(257-283)]                                                                                                                                                                                                                                                                                                                                    |
| 8888  | PhAeBC5_15086.1                                                          | [Poly A polymerase head domain(38-175), Probable RNA and SrmB-binding site of polymerase A(221-262)]                                                                                                                                                                                                                                                                                                                         |
| 18709 | PhAeBC5_654.1                                                            | [Nup53/35/40-type RNA recognition motif(116-150)]                                                                                                                                                                                                                                                                                                                                                                            |
| 806   | PhAeBC5_4239.1                                                           | [Leucyl-tRNA synthetase, Domain 2(347-405), tRNA synthetases class I (C) catalytic domain(632-673), Anticodon-binding domain of tRNA(774-922), KRI1-like family(995-1025)]                                                                                                                                                                                                                                                   |
| 2270  | PhAeBC5_3356.1<br>StHeBC3_2868.1                                         | [Adenylate kinase, active site lid(171-198)] [tRNA synthetases class I (I, L, M and V)(435-474), Anticodon-binding domain of tRNA(537-621)]                                                                                                                                                                                                                                                                                  |
| 4067  | PhAeBC5_9762.1                                                           | [tRNAHis guanylyltransferase(265-391)]                                                                                                                                                                                                                                                                                                                                                                                       |
| 10050 | PhAeBC5_4284.2                                                           | [Histidyl-tRNA synthetase(109-430), Anticodon binding domain(462-538)]                                                                                                                                                                                                                                                                                                                                                       |
| 13892 | PhAeBC5_4266.1                                                           | [Ribosomal protein S13/S18(60-132)]                                                                                                                                                                                                                                                                                                                                                                                          |
| 17    | PhAeBC5_8480.1                                                           | [ABC transporter transmembrane region(725-970), AAA domain(1076-1091), RNA helicase(1247-1282)]                                                                                                                                                                                                                                                                                                                              |
| 9613  | PhAeBC5_16890.17                                                         | [3-beta hydroxysteroid dehydrogenase/isomerase family(10-73), Dimerisation domain of Zinc Transporter(333-357)]                                                                                                                                                                                                                                                                                                              |
| 15246 | PhAeBC5_2525.1                                                           | [Albumin I chain a(71-112)]                                                                                                                                                                                                                                                                                                                                                                                                  |
| 1226  | PhAeBC5_11914.4                                                          | [DNA polymerase III beta subunit, central domain(12-79), BAAT / Acyl-CoA thioester hydrolase C terminal(135-162)]                                                                                                                                                                                                                                                                                                            |
| 10143 | PhAeBC5_14056.1                                                          | [HEAT-like repeat(383-391), Tubulin folding cofactor D C terminal(427-614), HEAT repeat(640-657)]                                                                                                                                                                                                                                                                                                                            |
| 3861  | PhAeBC5_22555.2<br>PhAeBC5_9914.1                                        | [Poly (ADP-ribose) glycohydrolase (PARG)(614-632)] [Poly (ADP-ribose) glycohydrolase (PARG)(78-432)]                                                                                                                                                                                                                                                                                                                         |
| 4598  | PhAeBC5_13756.1                                                          | [Colicin D(303-330)]                                                                                                                                                                                                                                                                                                                                                                                                         |
| 19696 | PhAeBC5_17034.1                                                          | [Peptidase C39 family(300-311)]                                                                                                                                                                                                                                                                                                                                                                                              |
| 16703 | StHeBC3_11327.15                                                         | [GRF zinc finger(56-86)]                                                                                                                                                                                                                                                                                                                                                                                                     |
| 4572  | PhAeBC5_8623.1                                                           | [Leucine Rich Repeat(182-192), Leucine Rich repeat(206-214), Leucine Rich repeats (2 copies)(316-325)]                                                                                                                                                                                                                                                                                                                       |
| 5896  | StHeBC3_21126.2                                                          | [Proline-rich nuclear receptor coactivator(17-65), Uncharacterised protein family (UPF0180)(206-237), PCI domain(299-377)]                                                                                                                                                                                                                                                                                                   |
| 218   | PhAeBC5_31016.1<br>StHeBC3_32425.1<br>PhAeBC5_20413.1<br>TrVeBC3_29569.1 | [Protein of unknown function (DUF 659)(16-145), Domain of unknown function (DUF4413)(278-387), hAT family C-terminal dimerisation region(456-535)] [BED zinc finger(57-115), Protein of unknown function (DUF 659)(199-334), Domain of unknown function (DUF4413)(492-590)] [Protein of unknown function (DUF 659)(371-392)] [Domain of unknown function (DUF4413)(250-355), Protein of unknown function (DUF 659)(393-413)] |
| 1021  | PhAeBC5_17559.1<br>TrVeBC3_24500.1                                       | [DDE superfamily endonuclease(66-145), hAT family C-terminal dimerisation region(419-489)] [BED zinc finger(69-113), Protein of unknown function (DUF 659)(247-393)]                                                                                                                                                                                                                                                         |
| 5002  | PhAeBC5_9781.2                                                           | [BED zinc finger(316-368), Domain of unknown function (DUF4413)(414-512), hAT family C-terminal dimerisation region(568-650)]                                                                                                                                                                                                                                                                                                |
| 12835 | StHeBC3_10075.1                                                          | [Plant transposon protein(167-274)]                                                                                                                                                                                                                                                                                                                                                                                          |
| 14230 | PhAeBC5_34854.1                                                          | [RhoGEF domain(297-379), MULE transposase domain(433-464), Domain of Unknown Function with PDB structure (DUF3862)(495-                                                                                                                                                                                                                                                                                                      |

|       |                   |                                                                                                                                     |
|-------|-------------------|-------------------------------------------------------------------------------------------------------------------------------------|
|       |                   | 547)]                                                                                                                               |
| 15149 | PhAeBC5_8832.4    | [hAT family C-terminal dimerisation region(142-224)]                                                                                |
|       | PhAeBC5_1584.1    | [Kelch motif(200-213), Domain of unknown function (DUF4585)(252-270), Galactose oxidase, central domain(279-310)] [Kelch motif(144- |
| 13512 | PhAeBC5_3740.1    | 157), Protein of unknown function (DUF1668)(222-244)]                                                                               |
| 14233 | StHeBC3_16619.1   | [Kelch motif(339-357)]                                                                                                              |
| 14675 | PhAeBC5_12620.5   | [Kelch motif(198-213)]                                                                                                              |
| 18354 | PhAeBC5_5786.1    | [Zinc-finger of C2H2 type(255-261), C2H2-type zinc finger(311-314)]                                                                 |
| 20190 | PhAeBC5_2529.1    | [DNA polymerase phi(10-104)]                                                                                                        |
| 23480 | PhAeBC5_5395.1    | [GAG-polyprotein viral zinc-finger(137-151)]                                                                                        |
| 18774 | StHeBC3_4423.1    | [Protein of unknown function (DUF1618)(174-337)]                                                                                    |
| 13656 | StHeBC3_41710.1   | NO HITS                                                                                                                             |
|       | ShContig9483_gi29 |                                                                                                                                     |
| 19297 | 5389393_19297     | NO HITS                                                                                                                             |
| 20188 | PhAeBC5_1574.1    | NO HITS                                                                                                                             |

Genes from each orthogroup were annotated with a Pfam domain, with bracket separating the information for each gene. Domains for a gene are separated by comma, and each domain is followed by the corresponding region in the encoded protein sequence.
